# Supplementary material for: Improved mammalian family phylogeny using gap-rare multiple sequence alignment: A timetree of extant placentals and marsupials
Source: PubMed Central journal article supplement — Zool Res. 2023 Nov 18;44(6):1064–79. doi: 10.24272/j.issn.2095-8137.2023.189 (PMC10802097; doi:10.24272/j.issn.2095-8137.2023.189), 2023-11-18
Supplement: zr-44-1064-S1.pdf [file zr-44-1064-S1.pdf]

## Supplementary Materials

### **Improved mammalian family phylogeny using gap-rare multiple sequence alignment: A timetree of extant placentals and marsupials**

Gao-Ming Liu<sup>1</sup>, Qi Pan<sup>1,2</sup>, Juan Du<sup>1,2</sup>, Ping-Fen Zhu<sup>1</sup>, Wei-Qiang Liu<sup>1,2</sup>, Zi-Hao Li<sup>1,2</sup>, Ling Wang<sup>1,2</sup>, Chun-Yan Hu<sup>1,2</sup>, Yi-Chen Dai<sup>1</sup>, Xiao-Xiao Zhang<sup>1,2</sup>, Zhan Zhang<sup>1,2</sup>, Yang Yu<sup>3</sup>, Meng Li<sup>1</sup>, Peng-Cheng Wang<sup>1,4</sup>, Xiao Wang<sup>1</sup>, Ming Li<sup>1</sup>, Xu-Ming Zhou<sup>1,\*</sup>

<sup>1</sup>Key Laboratory of Animal Ecology and Conservation Biology, Institute of Zoology, Chinese Academy of Sciences, Beijing 100101, China

<sup>2</sup>University of Chinese Academy of Sciences, Beijing 100049, China

<sup>3</sup>School of Life Sciences, University of Science and Technology of China, Hefei, Anhui 230026, China

<sup>4</sup>College of Life Sciences, Nanjing Normal University, Nanjing, Jiangsu 210023, China

\*Corresponding author, E-mail: [zhouxuming@ioz.ac.cn](mailto:zhouxuming@ioz.ac.cn)

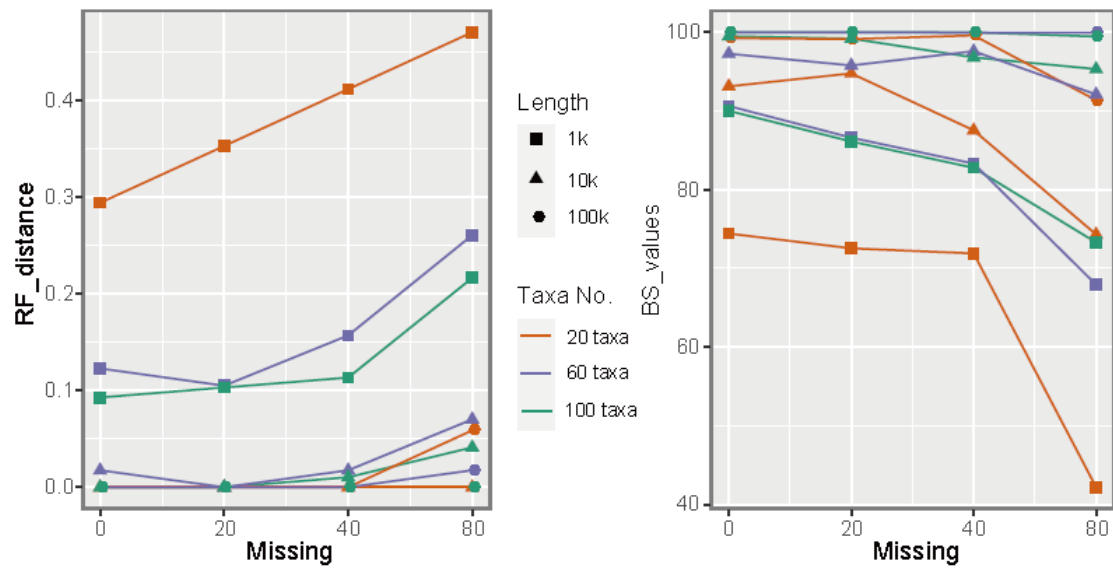

**Supplementary Figure S1 RF distance and BS value under different percentages of missing data**

Different line colors indicate different number of taxa and different shape indicates different alignment lengths.

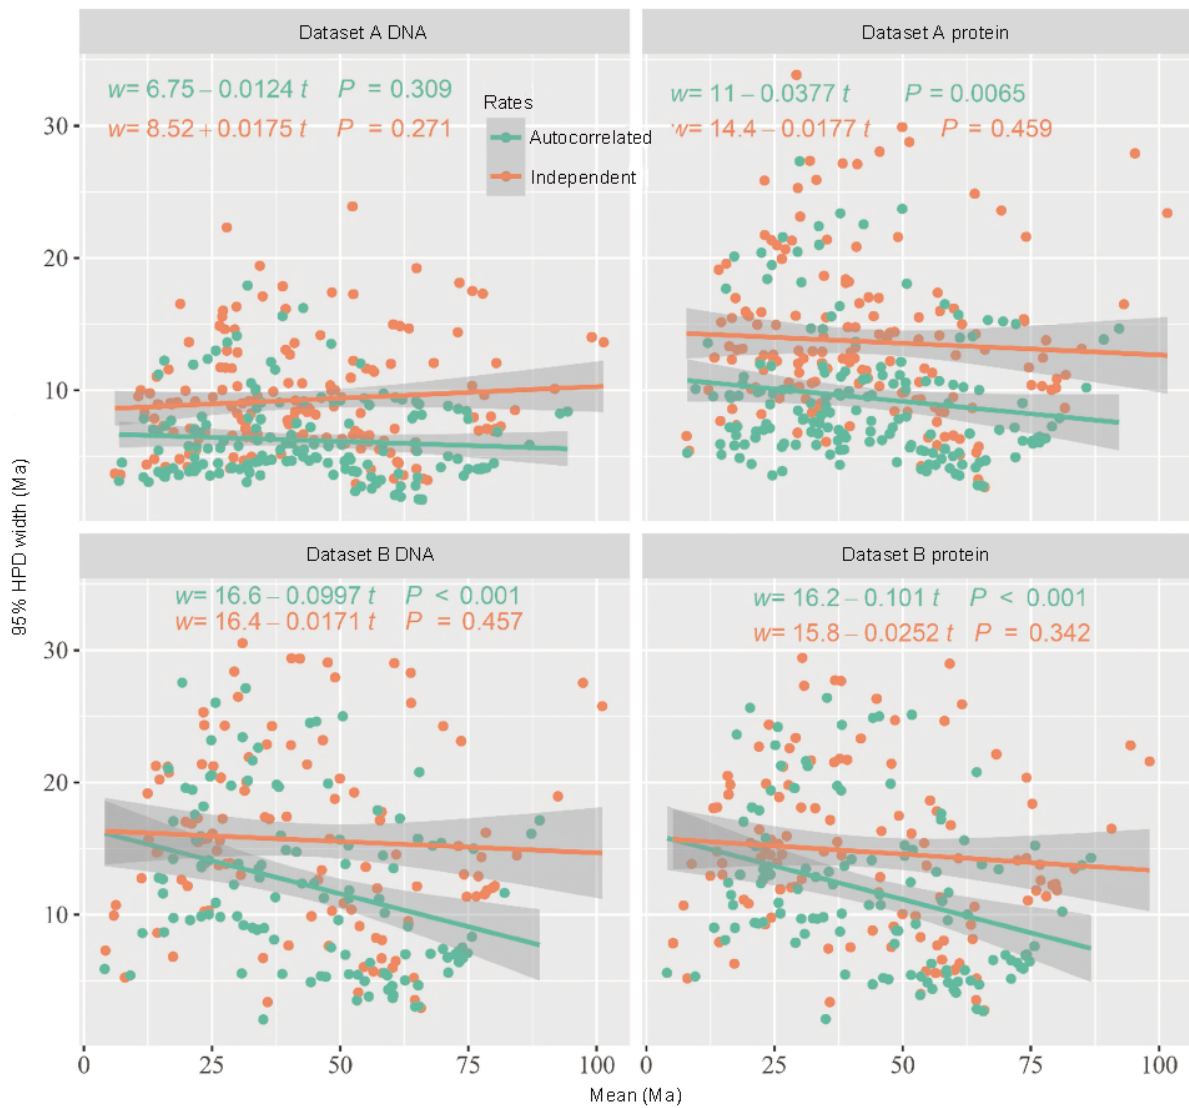

**Supplementary Figure S2 Posterior 95% HPD width plots against mean posterior divergence times for two datasets under AR and IR clocks**

Fitted solid line with confidence interval (CI) (gray shadow) is the regression between posterior mean and 95% HPD width.

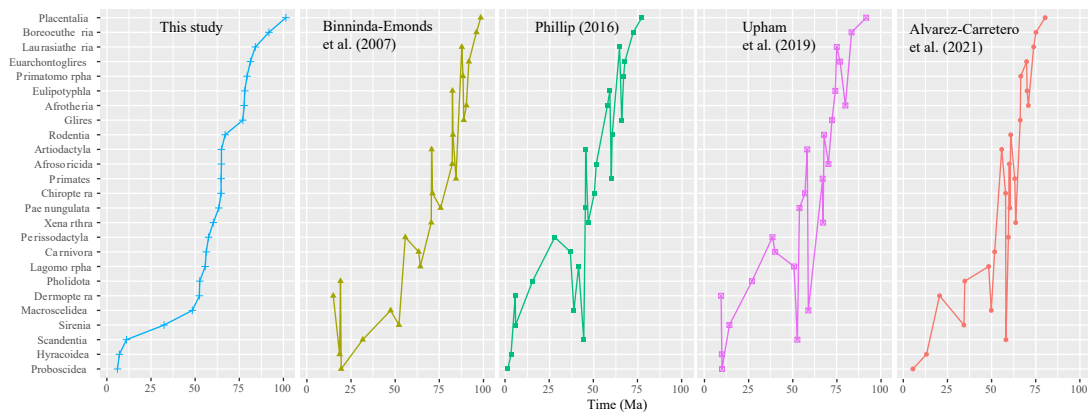

**Supplementary Figure S3 Vital internode divergence time comparison between this and other studies**

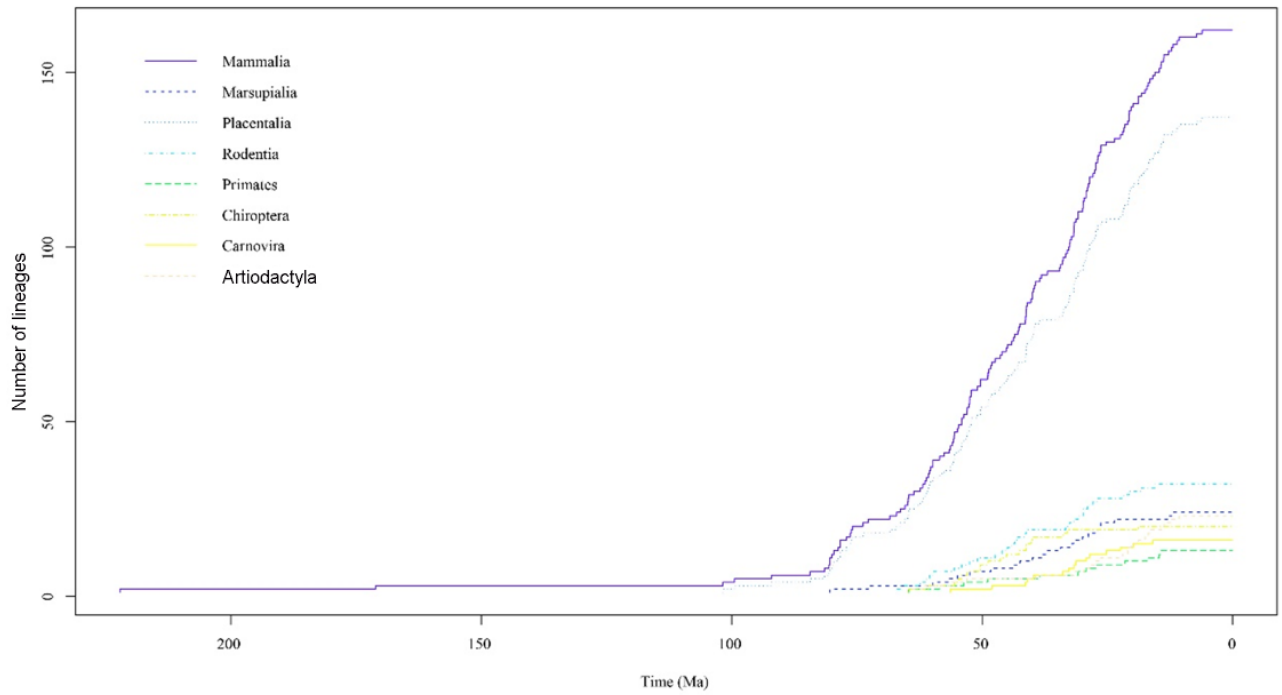

**Supplementary Figure S4 Lineage-through-time (LTT) plot of mammalian and large group lineages**  
Different colors indicate timetree of different mammalian lineages.

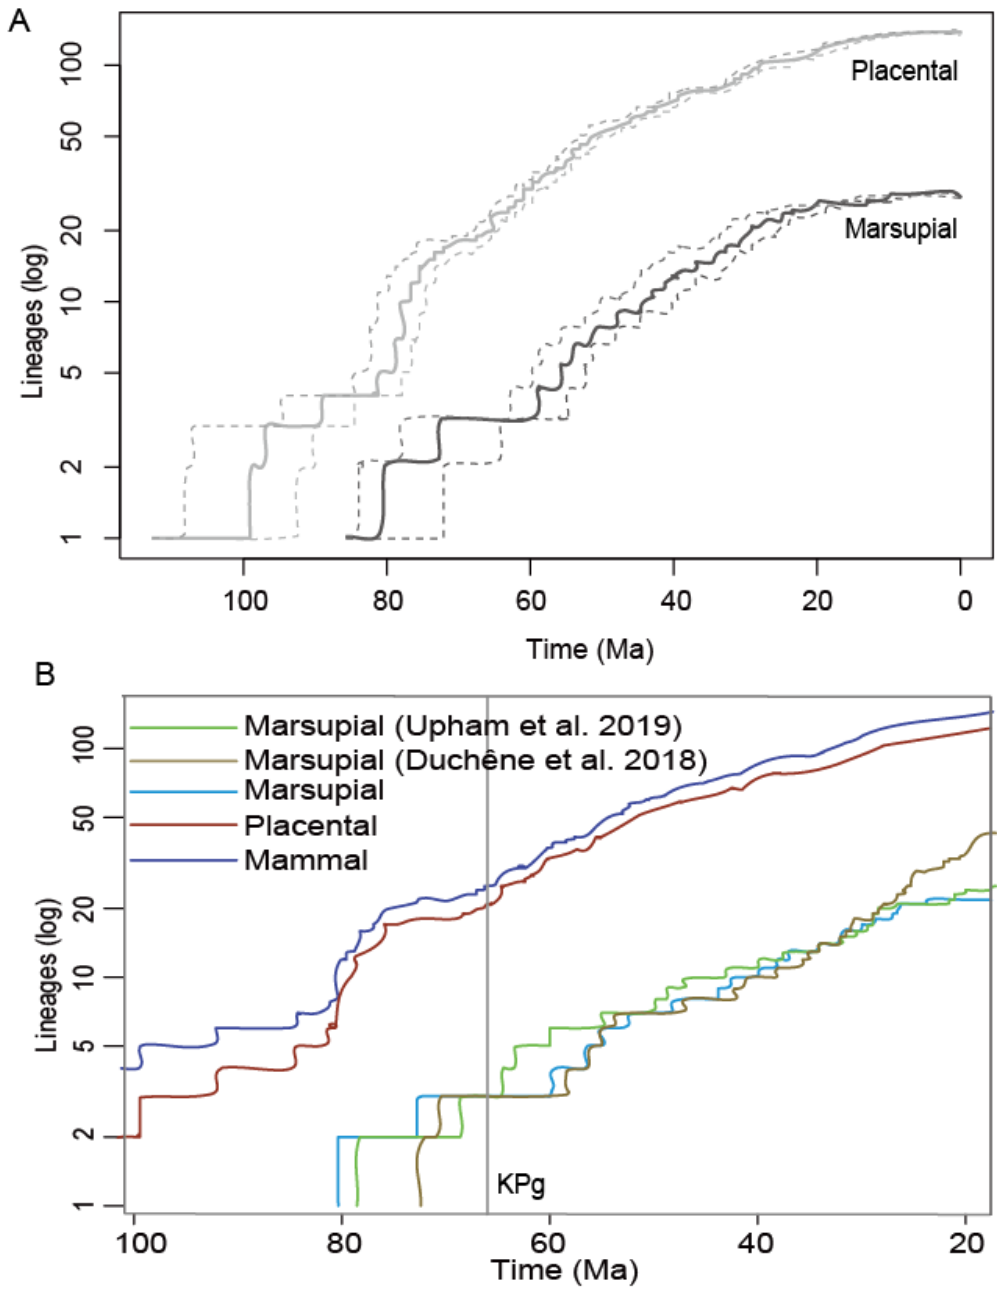

**Supplementary Figure S5 Lineage-through-time (LTT) plots of placentals and marsupials**

A: Mean and 95% CI of LTTs of placentals and marsupials. B: LTT plots for mammals, placentals, and marsupials with different sources.

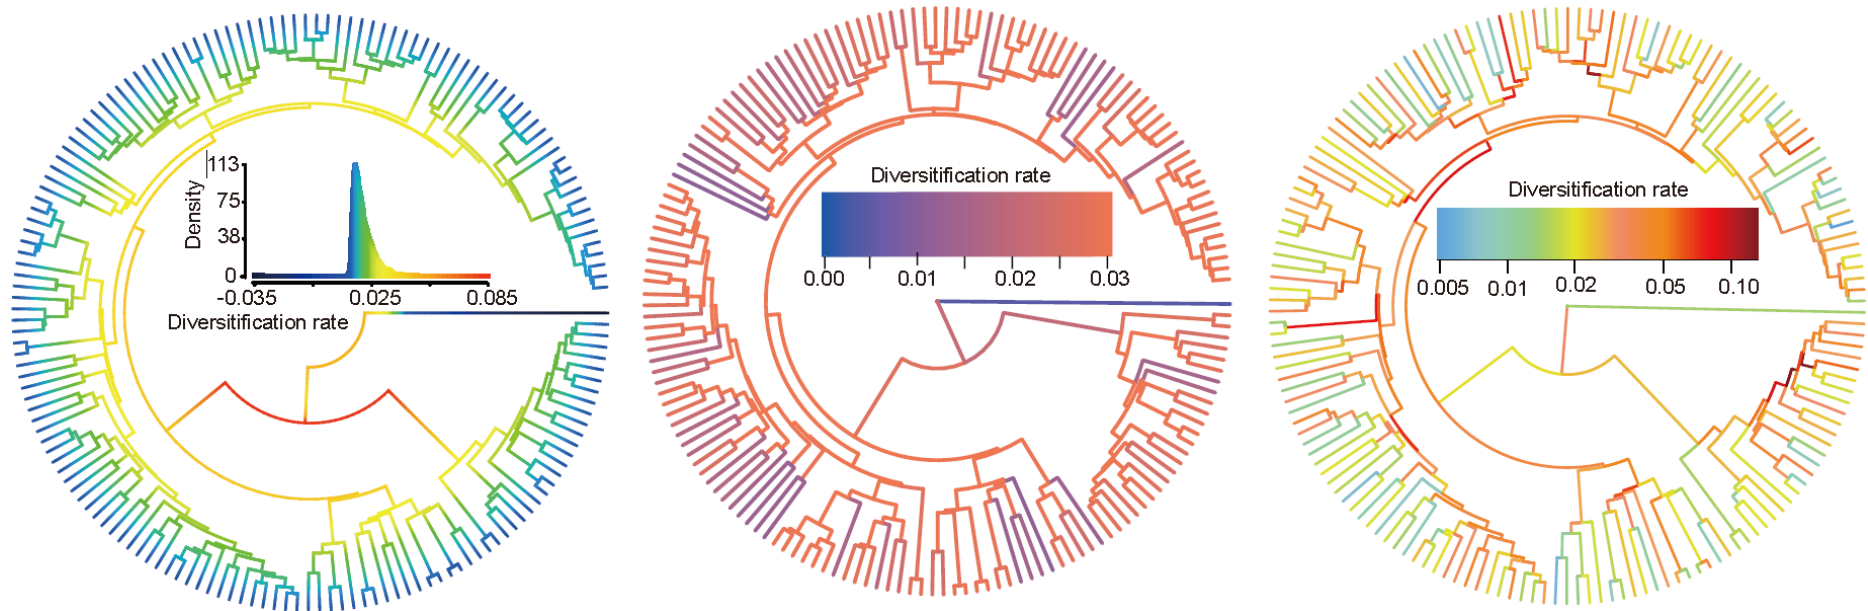

**Supplementary Figure S6 Branch-specific rate of mammalian lineages inferred from BAMMtools (left), RevBayes (middle), and RPANDA (rights)**  
 Diversification rate is represented by varying colors. Central left portion displays density of the diversification rate, while color gradient in the central and right portions indicates diversification rate from low to high..



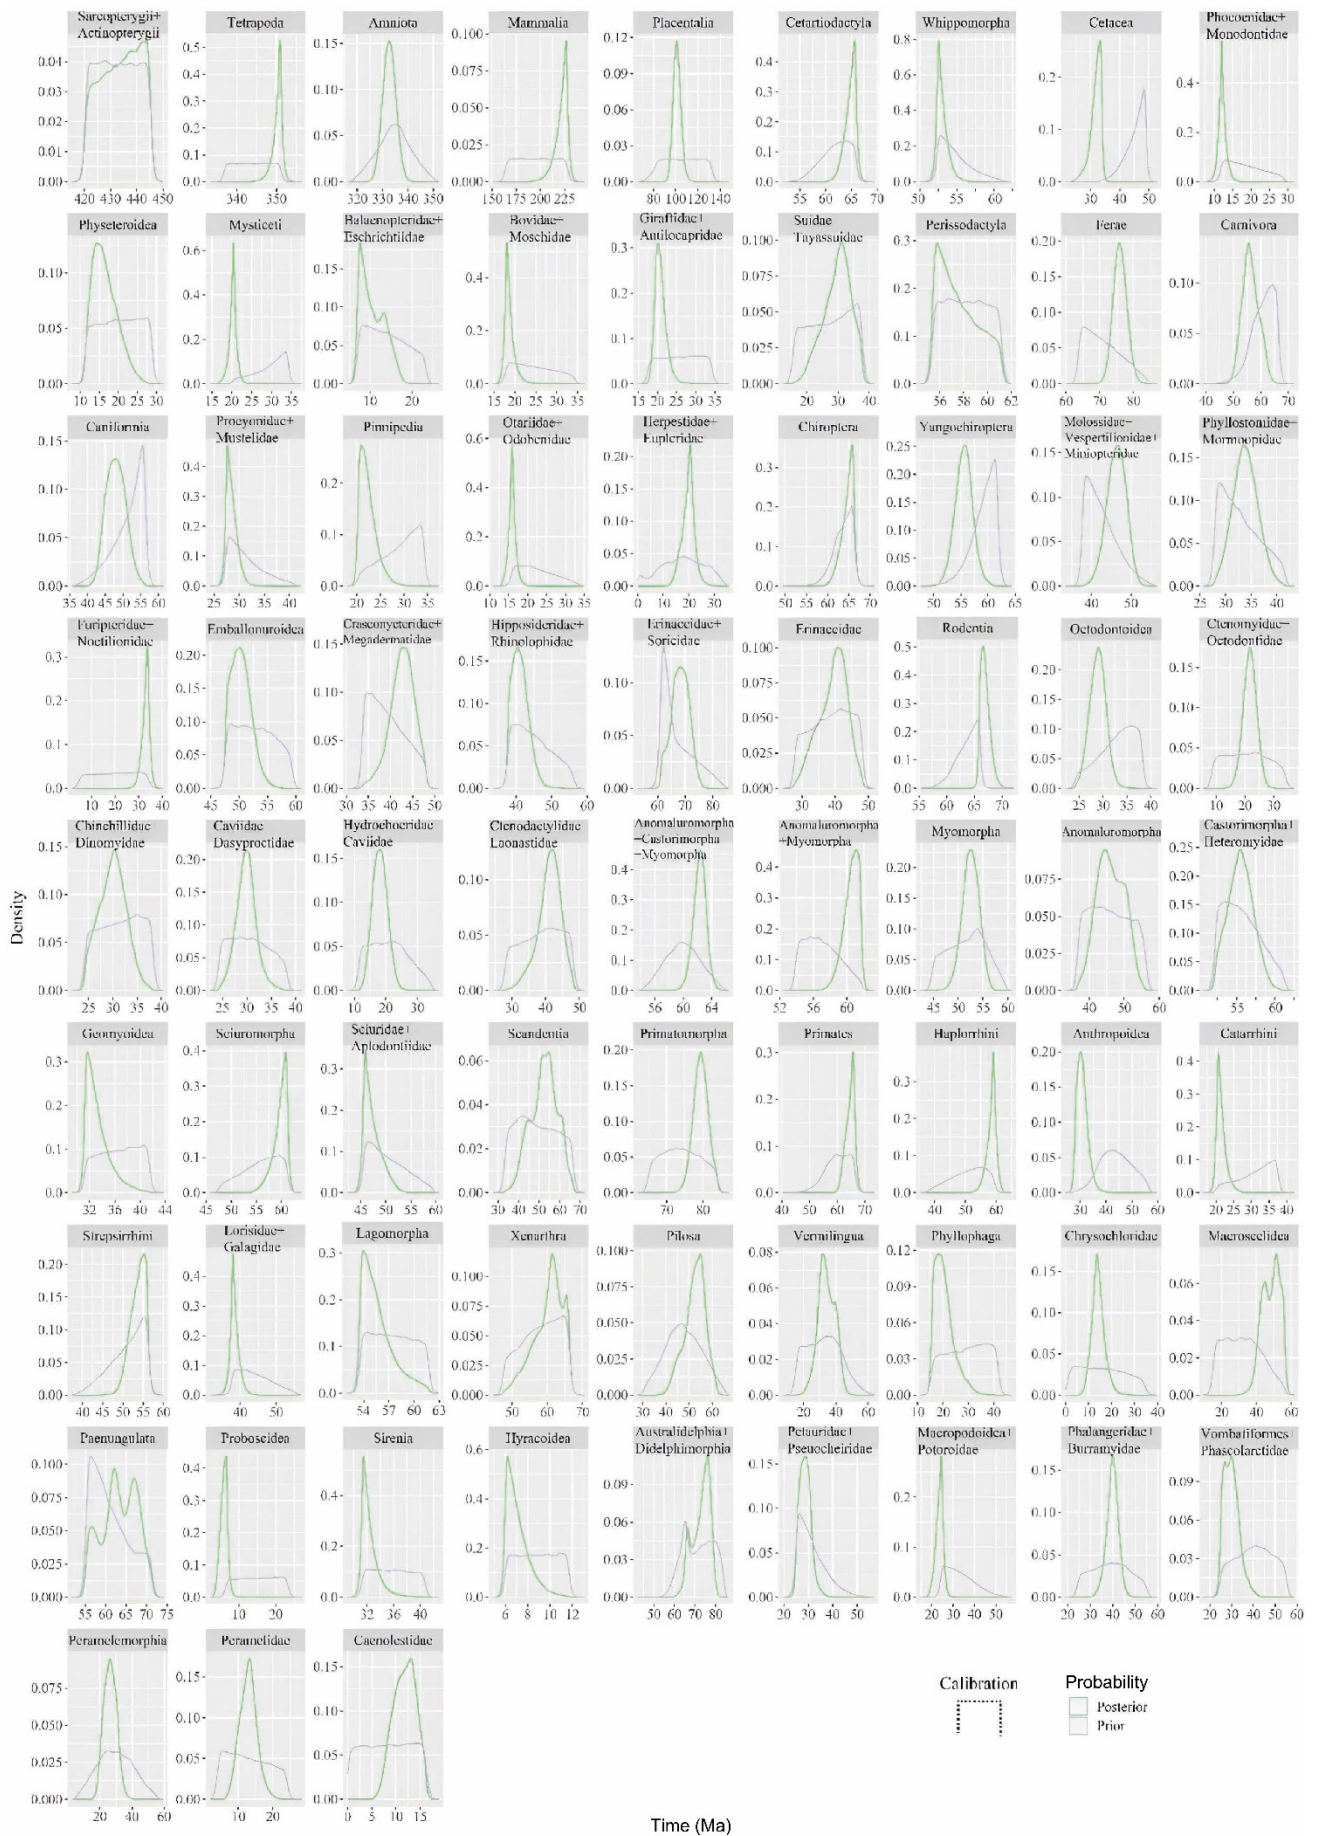



**Supplementary Figure S7 Prior (purple) and posterior (green) distribution of fossil calibration (dashed line) nodes from DNA alignments of Dataset A under an IR clock**

Purple and green lines indicate prior and posterior distribution, respectively. Black dotted line indicates fossil calibration.

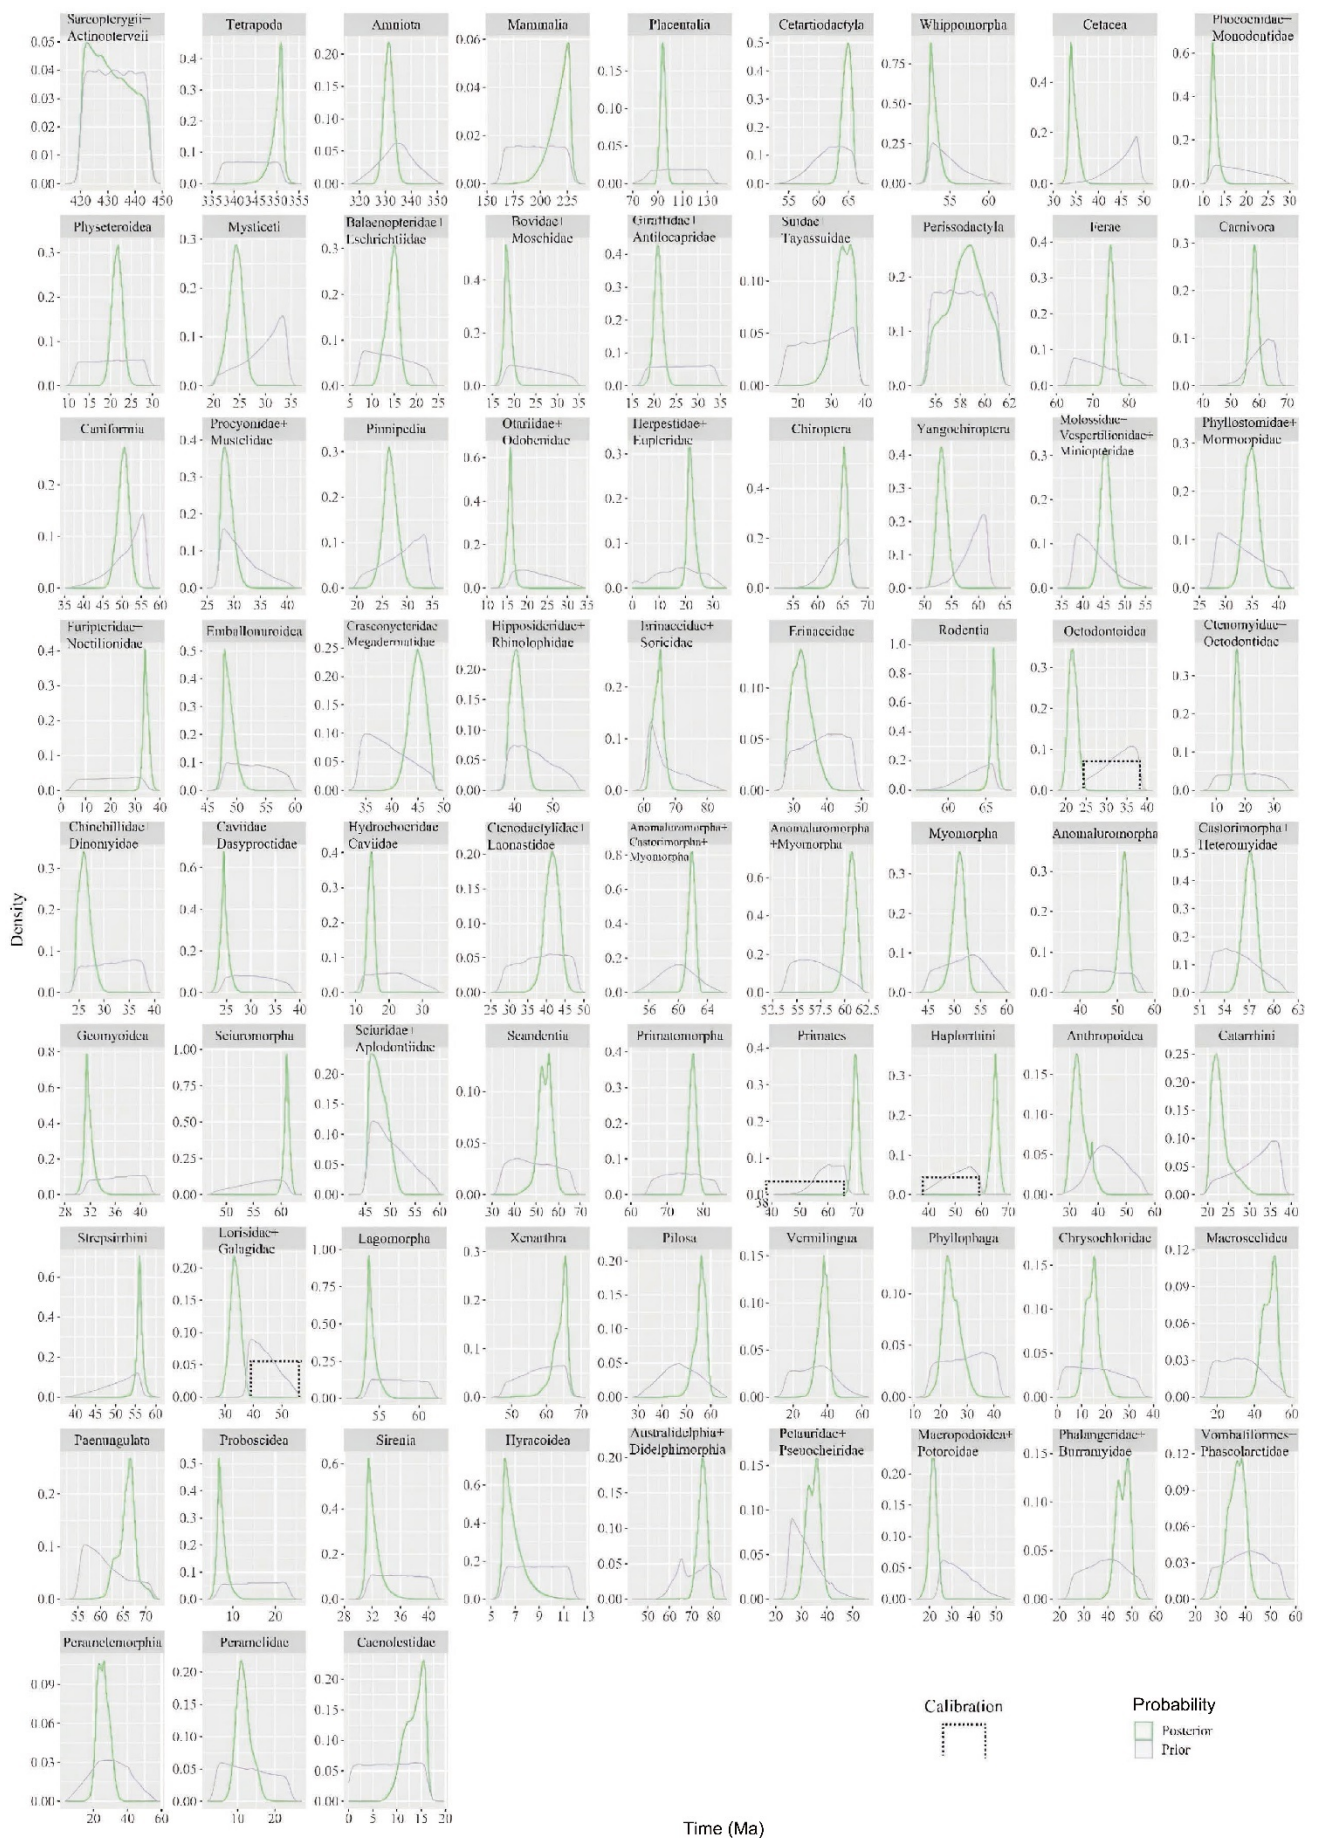

**Supplementary Figure S8 Prior (purple) and posterior (green) distribution of fossil calibration (dashed line) nodes from DNA alignments of Dataset A under an AR clock**

Purple and green lines indicate prior and posterior distribution, respectively. Black dotted line indicates fossil calibration.



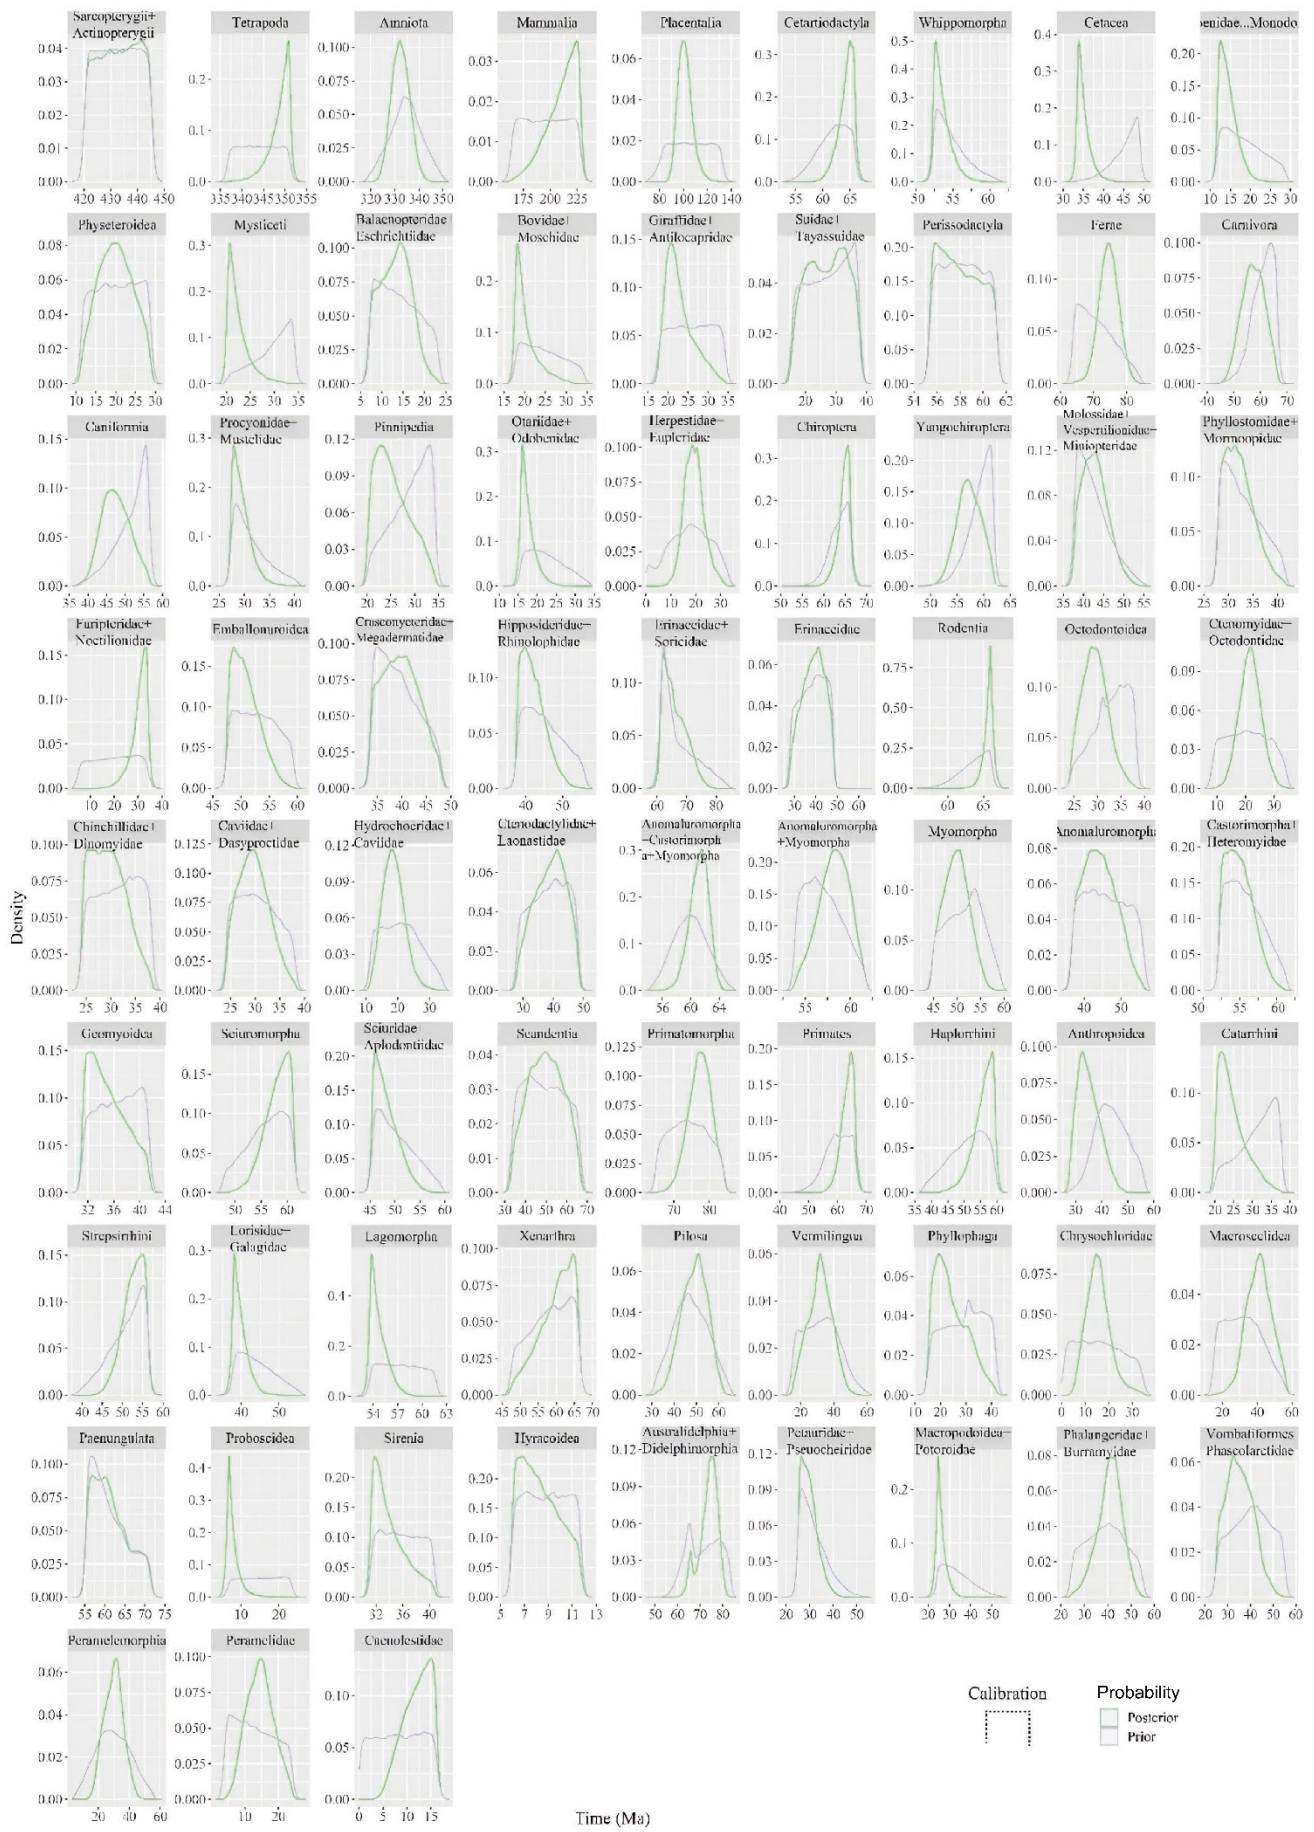

**Supplementary Figure S9 Prior (purple) and posterior (green) distribution of fossil calibration (dashed line) nodes from Dataset A protein sequences under an IR clock**

Purple and green lines indicate prior and posterior distribution, respectively. Black dotted line indicates fossil calibration.



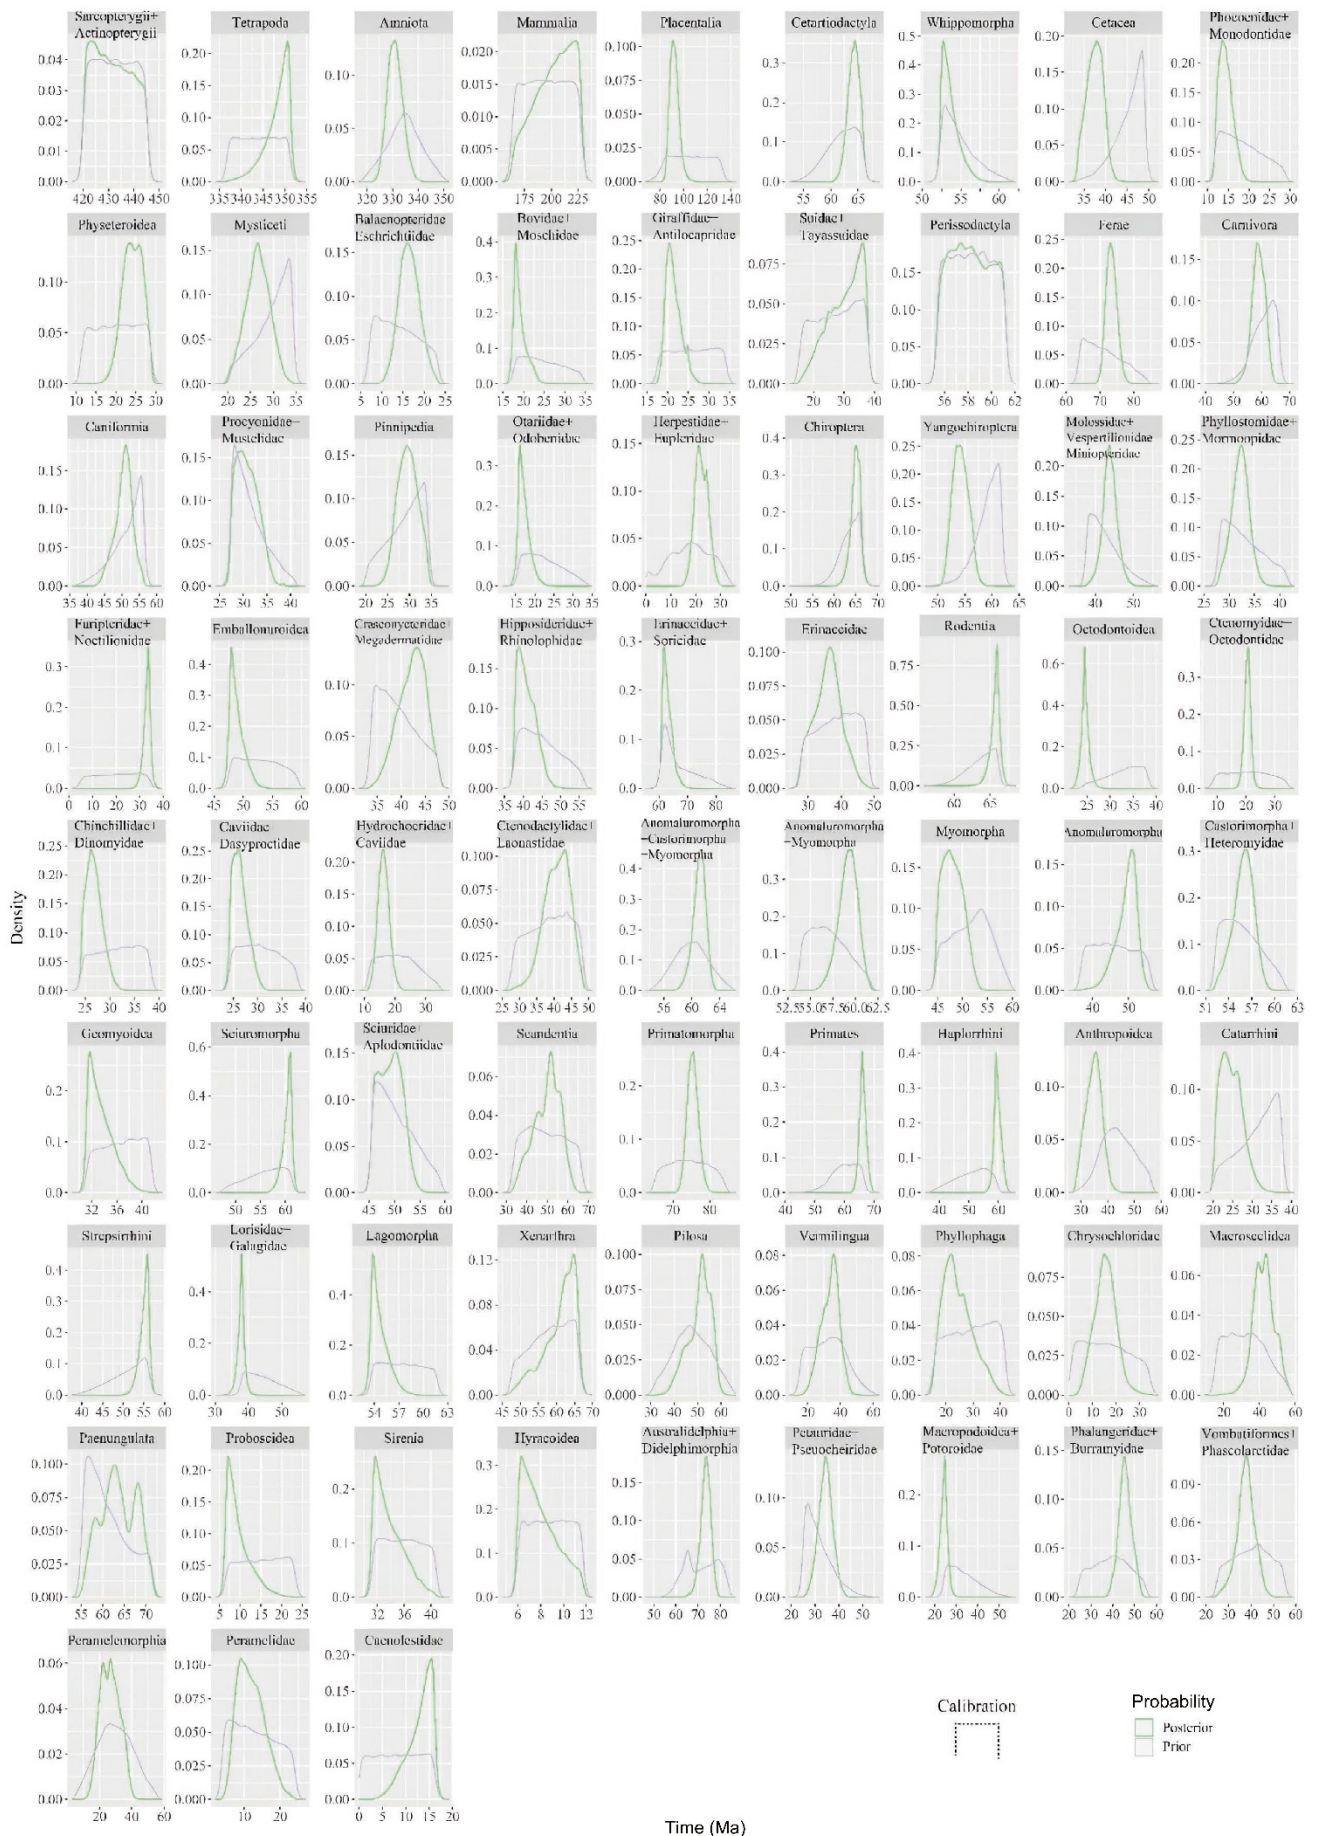

**Supplementary Figure S10 Prior (purple) and posterior (green) distribution of fossil calibration (dashed line) nodes from protein sequences of Dataset A under an AR clock**

Purple and green lines indicate prior and posterior distribution, respectively. Black dotted line indicates fossil calibration.



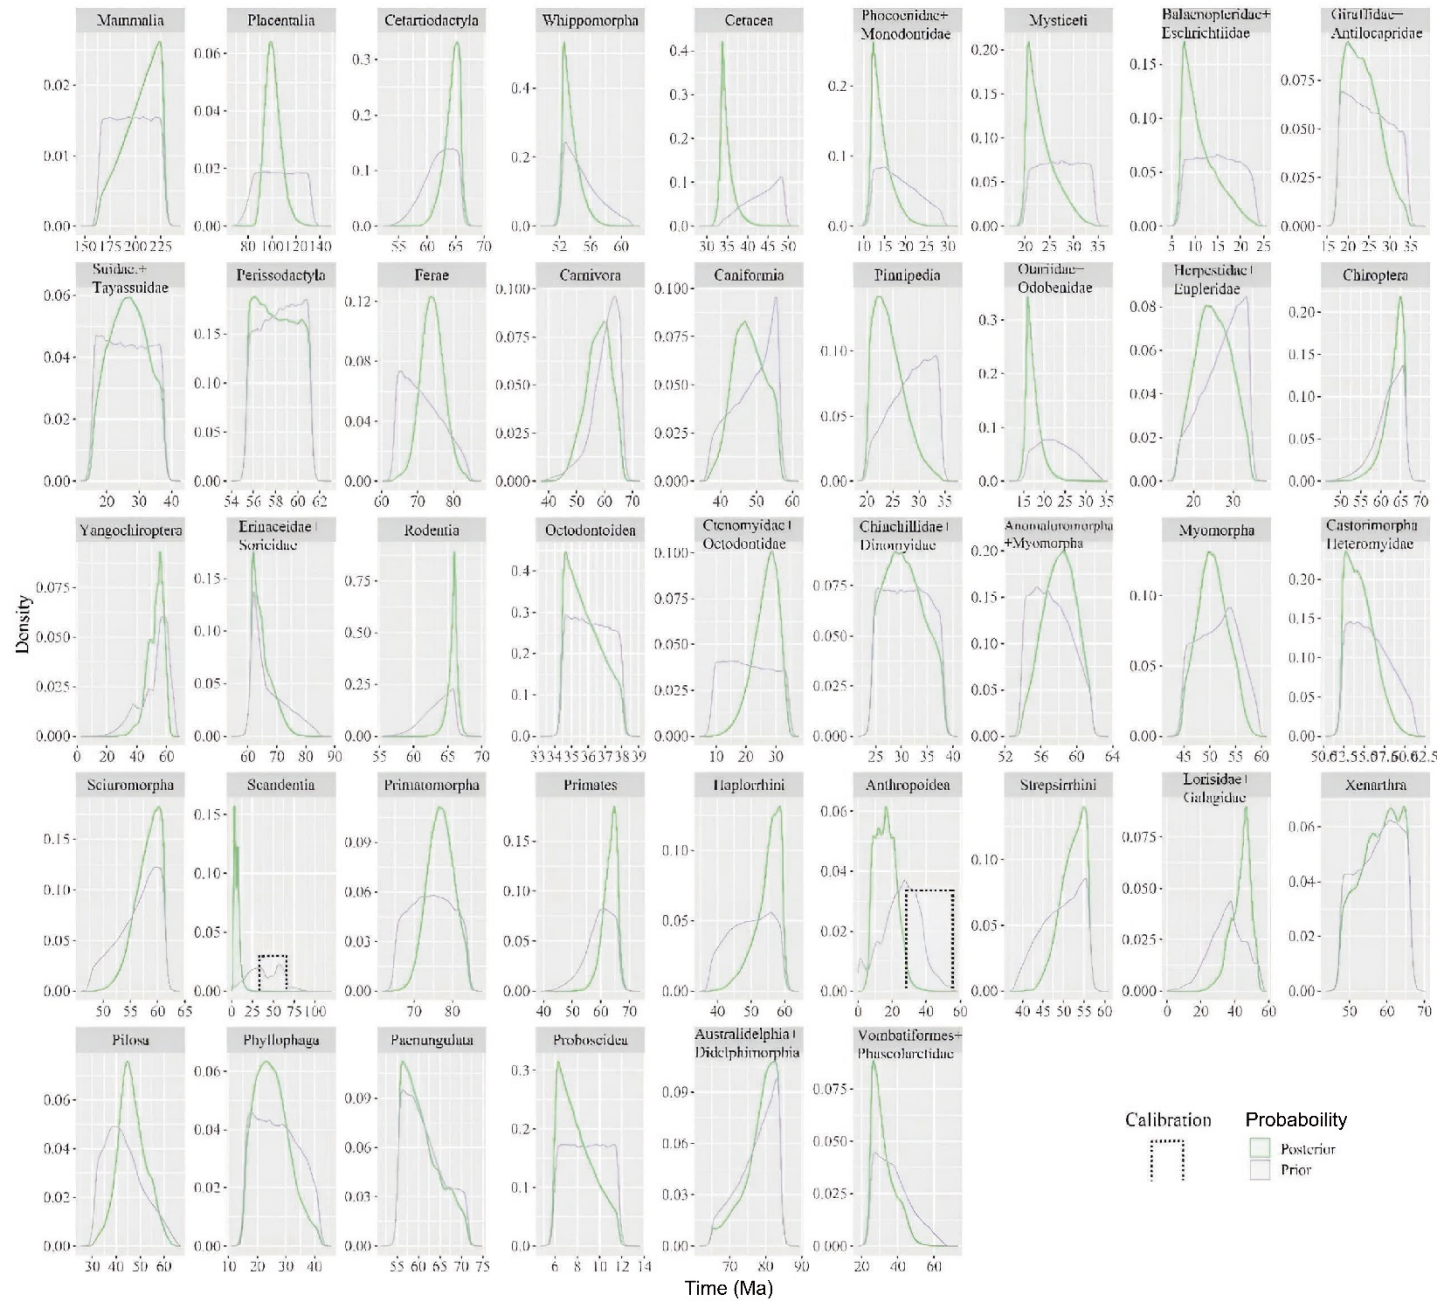

**Supplementary Figure S11 Prior (purple) and posterior (green) distribution of fossil calibration (dashed line) nodes from DNA sequences of Dataset B under an IR clock**

Purple and green lines indicate prior and posterior distribution, respectively. Black dotted line indicates fossil calibration.

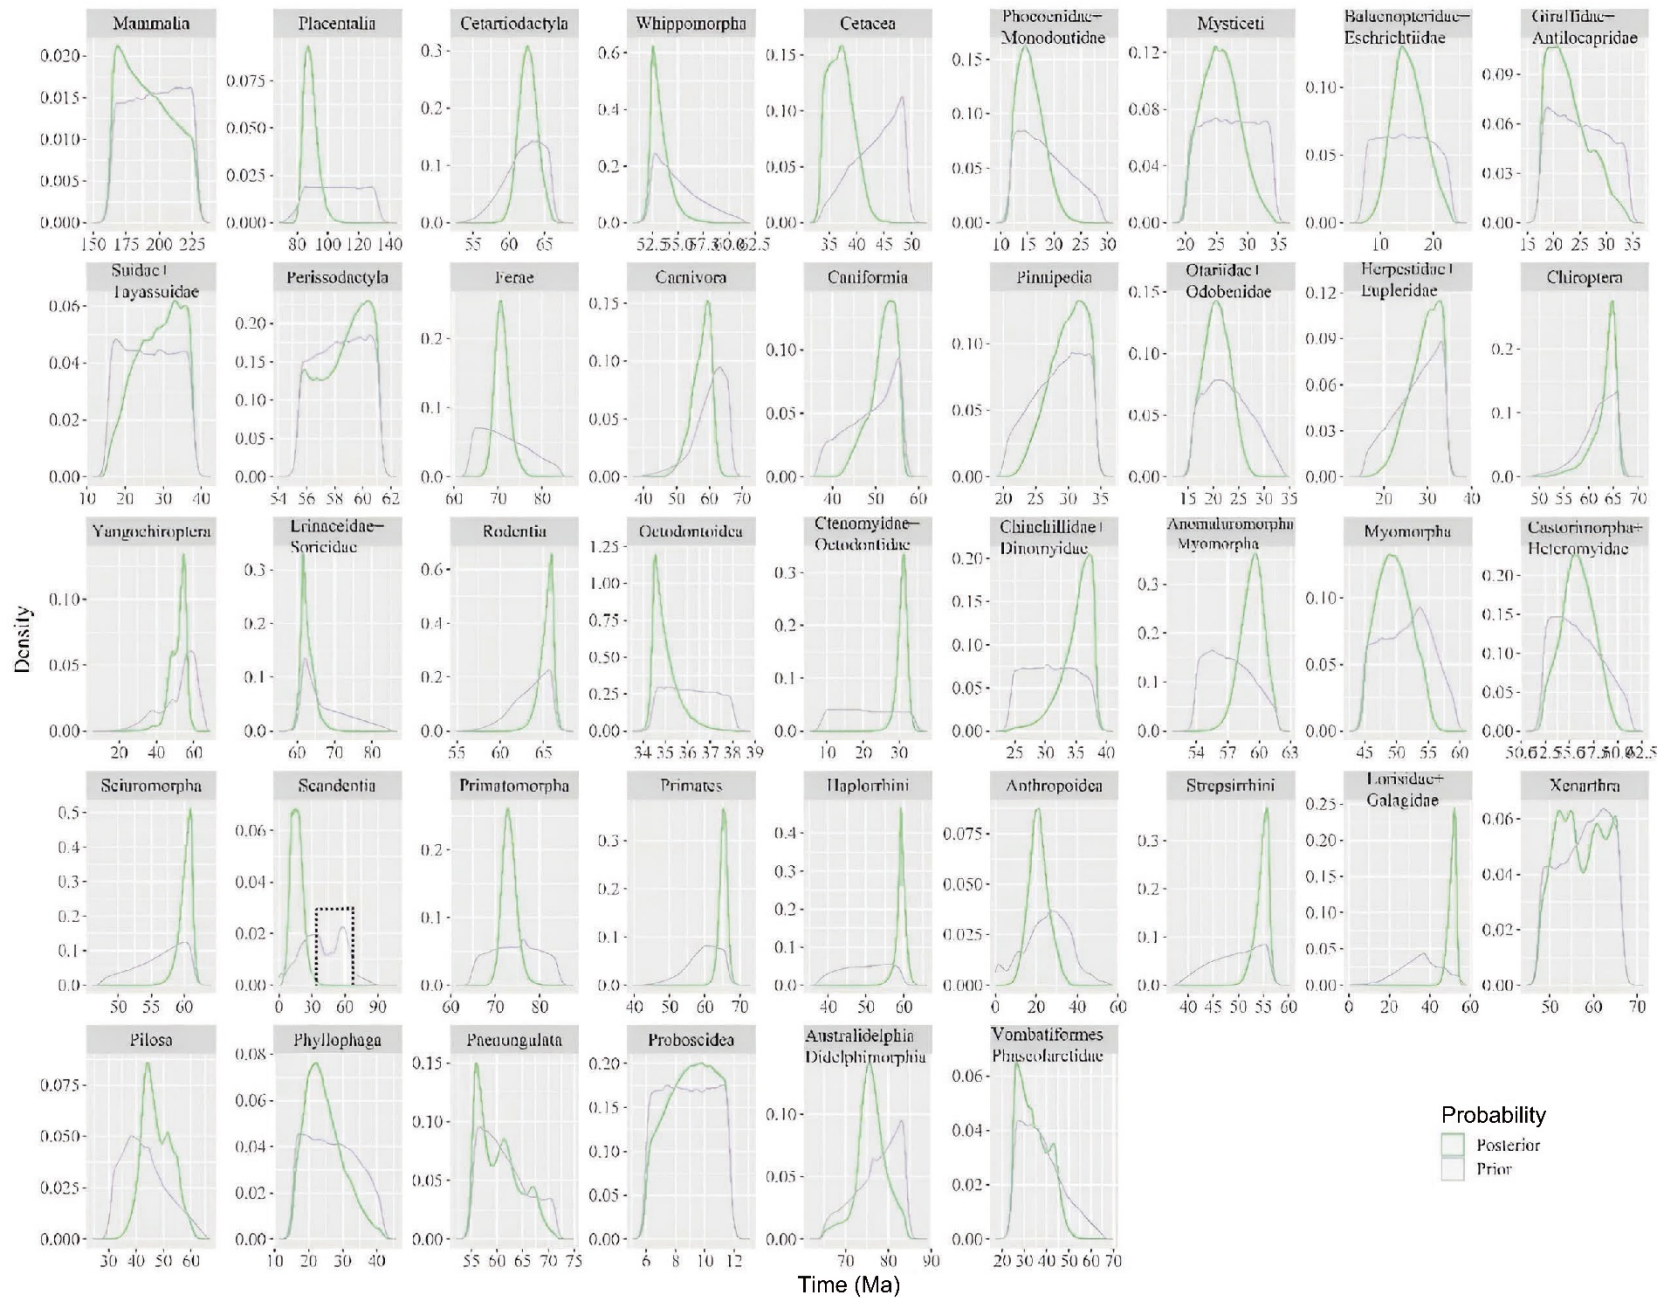

**Supplementary Figure S12 Prior (purple) and posterior (green) distribution of fossil calibration (dashed line) nodes from DNA sequences of Dataset B under an AR clock**

Purple and green lines indicate prior and posterior distribution, respectively. Black dotted line indicates fossil calibration.



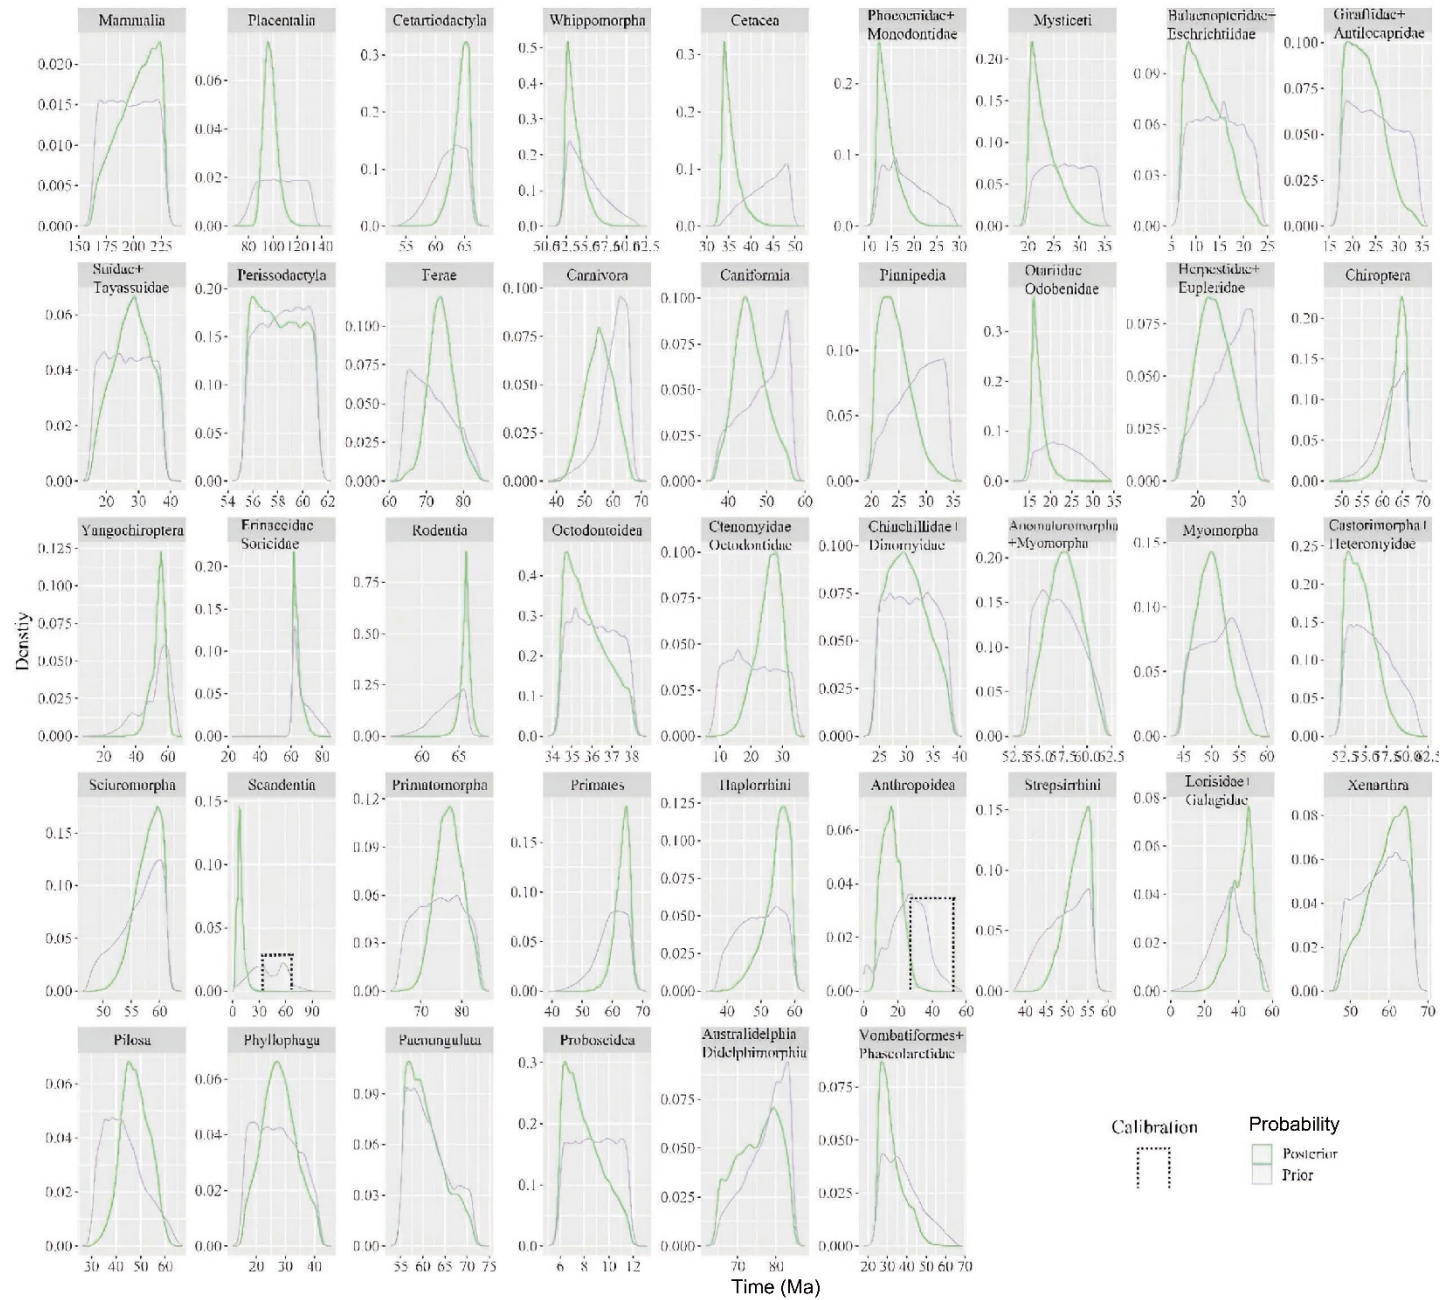

**Supplementary Figure S13 Prior (purple) and posterior (green) distribution of fossil calibration (dashed line) nodes from protein sequences of Dataset B under an IR clock**

Purple and green lines indicate prior and posterior distribution, respectively. Black dotted line indicates fossil calibration.

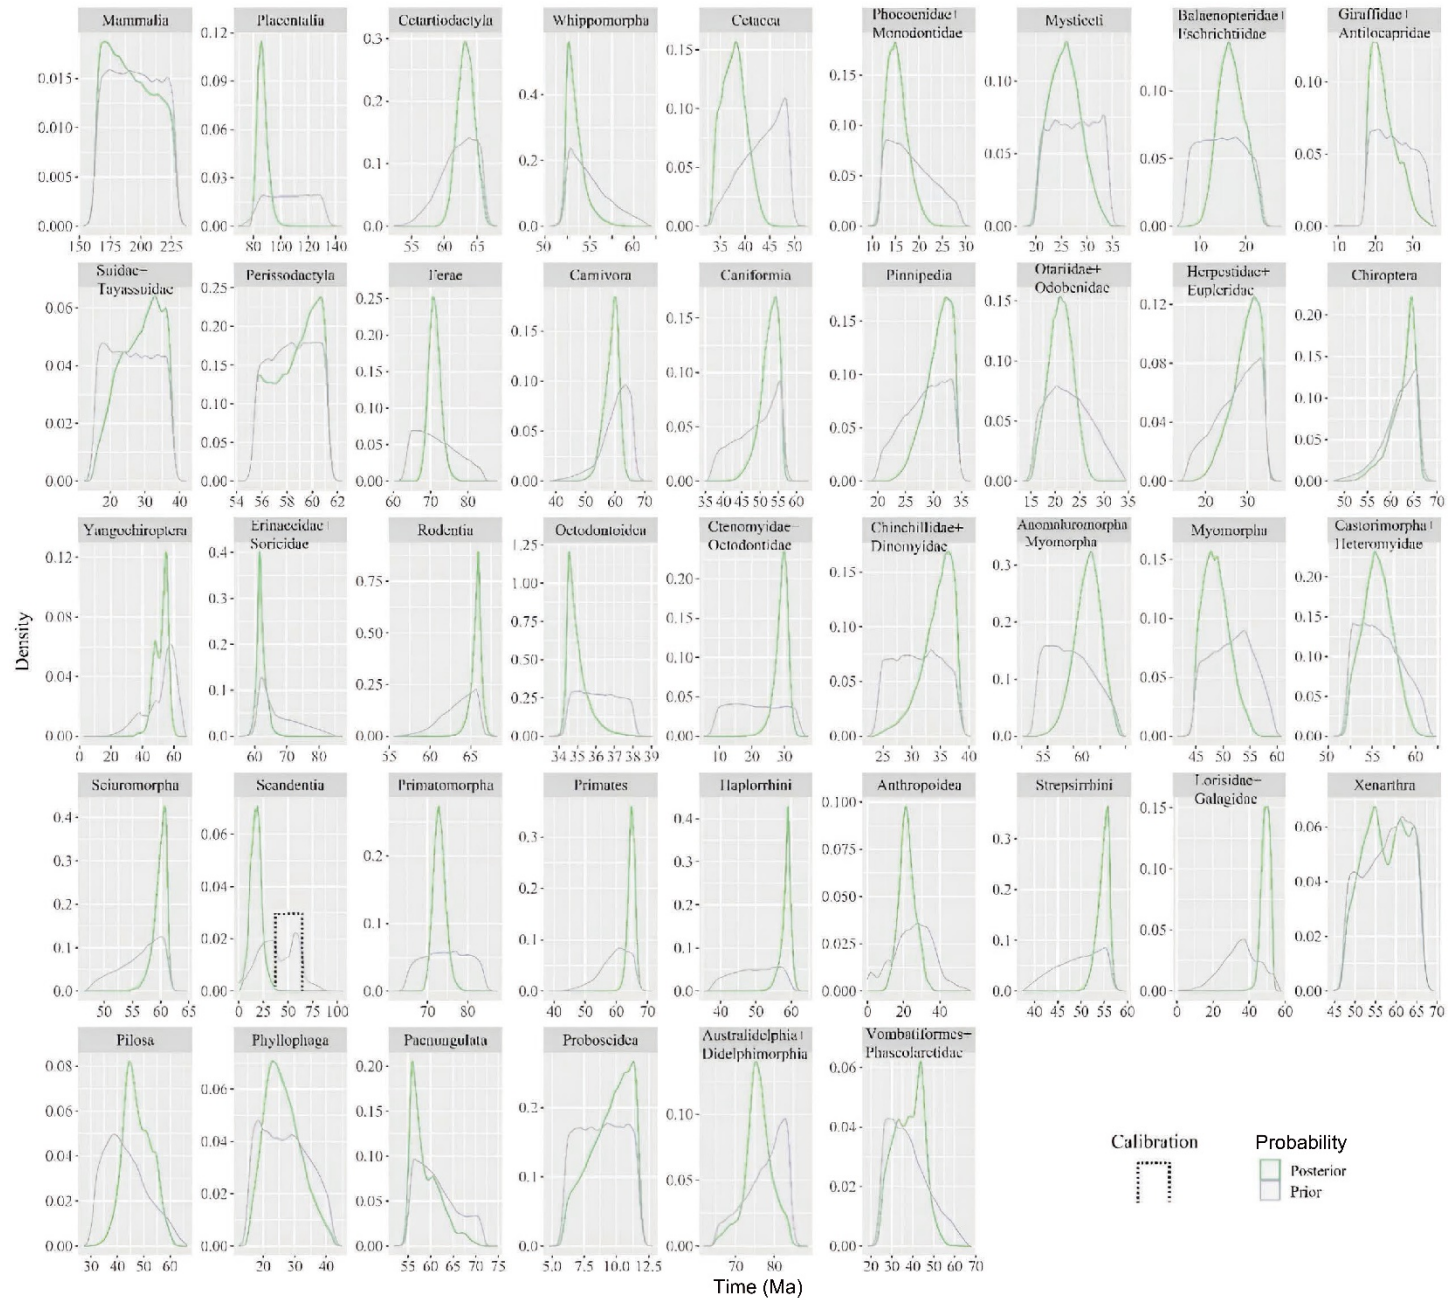



**Supplementary Figure S14 Prior (purple) and posterior (green) distribution of fossil calibration (dashed line) nodes from protein sequences of under an AR clock**

Purple and green lines indicate prior and posterior distribution, respectively. Black dotted line indicates fossil calibration.

**Supplementary Table S1. Sequence origins and gap information of 162 mammalian lineages in dataset A.**

| Species_famality                             | ADORA3          | ADRB2           | APP             | ATP7A           | BCHE            |
|----------------------------------------------|-----------------|-----------------|-----------------|-----------------|-----------------|
| Ailurus fulgens_Ailuridae                    | +               | +               | +               | +               | +               |
| Chrysochloridae_Chrysochloridae              | +               | +               | +               | +               | +               |
| Aplodontia rufa_Aplodontiidae                | +               | +               | +               | +               | GCA_004027875.1 |
| Arctocephalus forsteri_Otariidae             | +               | +               | +               | +               | +               |
| Bradypus tridactylus_Bradypodidae            | +               | +               | +               | +               | +               |
| Capromys pilorides_Capromyidae               | +               | +               | GCA_004027915.1 | +               | +               |
| Ceratotherium simum_Rhinocerotidae           | +               | +               | +               | +               | +               |
| Chinchilla lanigera_Chinchillidae            | -               | GCF_000276665.1 | +               | +               | +               |
| Chrysochloris asiatica_Chrysochloridae       | +               | +               | +               | +               | +               |
| Craseonycteris thonglongyai_Craseonycteridae | +               | +               | +               | +               | GCA_004027555.1 |
| Cricetus cricetus_Cricetidae                 | +               | +               | +               | +               | GCF_000223135.1 |
| Dasyprocta punctata_Dasyproctidae            | +               | +               | +               | +               | +               |
| Dasyuridae_Dasyuridae                        | +               | +               | +               | +               | +               |
| Didelphidae_Didelphidae                      | +               | +               | +               | +               | +               |
| Dinomys branickii_Dinomyidae                 | +               | +               | +               | +               | +               |
| Dipodomys_Heteromyidae                       | +               | +               | +               | +               | GCF_000151885.1 |
| Elephas maximus_Elephantidae                 | +               | GCA_014332765.1 | +               | +               | +               |
| Emballonuridae_Emballonuridae                | +               | +               | +               | +               | -               |
| Eschrichtius robustus_Eschrichtiidae         | +               | +               | GCA_002189225.1 | +               | +               |
| Viverridae_Viverridae                        | +               | GCA_004024585.1 | +               | +               | +               |
| Gliridae_Gliridae                            | +               | +               | +               | +               | +               |
| Heterocephalus glaber_Bathyergidae           | +               | +               | +               | +               | +               |
| Jaculus jaculus_Dipodidae                    | +               | +               | +               | GCA_000280705.1 | +               |
| Peramelidae_Peramelidae                      | GCA_904811065.1 | +               | +               | +               | GCA_904811065.1 |
| Manis pentadactyla_Manidae                   | +               | +               | AY011374.1      | +               | +               |
| Manis tricuspis_Manidae                      | +               | +               | +               | +               | +               |
| Mustelidae_Mustelidae                        | +               | +               | +               | +               | +               |
| Miniopterus_Vespertilionidae                 | +               | +               | +               | +               | GCF_001595765.1 |

|                                            |   |                 |                 |   |                 |
|--------------------------------------------|---|-----------------|-----------------|---|-----------------|
| Myocastor coypus_Myocastoridae             | + | +               | GCA_004027025.1 | + | +               |
| Myotis lucifugus_Vespertilionidae          | + | +               | GCF_000147115.1 | + | +               |
| Myzopoda aurita_Myzopodidae                | + | +               | +               | + | -               |
| Nandinia binotata_Nandiniidae              | + | -               | +               | + | +               |
| Noctilio_Noctilionidae                     | + | +               | +               | + | GCA_004026585.1 |
| Ochotona_Ochotonidae                       | + | +               | +               | + | +               |
| Ctenomyidae_Ctenomyidae                    | + | GCA_004027165.1 | +               | + | +               |
| Odobenus rosmarus_Odobenidae               | + | GCF_000321225.1 | +               | + | GCF_000321225.1 |
| Ornithorhynchus anatinus_Ornithorhynchidae | + | -               | -               | + | +               |
| Nesomyidae_Nesomyidae                      | + | +               | GCA_004027575.1 | + | -               |
| Erinaceidae_Erinaceidae                    | + | +               | +               | + | GCF_000296755.1 |
| Viverridae_Viverridae                      | + | +               | +               | + | +               |
| Procyon lotor_Procyonidae                  | + | +               | +               | + | +               |
| Rhinopoma hardwickii_Rhinopomatidae        | + | +               | +               | + | -               |
| Solenodon paradoxus_Solenodontidae         | + | +               | +               | + | +               |
| Sorex_Soricidae                            | + | +               | +               | + | +               |
| Spalacidae_Spalacidae                      | + | +               | GCF_000622305.1 | + | GCF_000622305.1 |
| Suricata suricatta_Herpestidae             | + | +               | +               | + | +               |
| Talpidae_Talpidae                          | + | +               | +               | + | +               |
| Tapirus indicus_Tapiridae                  | + | +               | +               | + | +               |
| Thryonomys swinderianus_Thryonomyidae      | + | GCA_004025085.1 | +               | + | +               |

Sample gap information (continuous)

| Species_famality                   | BDNF            | BMI1            | BRCA1 | CNR1 | CREM            |
|------------------------------------|-----------------|-----------------|-------|------|-----------------|
| Ailurus fulgens_Ailuridae          | +               | +               | +     | +    | +               |
| Chrysochloridae_Chrysochloridae    | +               | +               | +     | +    | +               |
| Aplodontia rufa_Aplodontiidae      | +               | GCA_004027875.1 | +     | +    | +               |
| Arctocephalus forsteri_Otariidae   | +               | +               | +     | +    | +               |
| Bradypus tridactylus_Bradypodidae  | +               | +               | +     | +    | +               |
| Capromys pilorides_Capromyidae     | GCA_004027915.1 | GCA_004027915.1 | +     | +    | GCA_004027915.1 |
| Ceratotherium simum_Rhinocerotidae | +               | GCF_000283155.1 | +     | +    | +               |

|                                              |                 |                 |            |                 |                 |
|----------------------------------------------|-----------------|-----------------|------------|-----------------|-----------------|
| Chinchilla lanigera_Chinchillidae            | GCF_000276665.1 | +               | +          | +               | +               |
| Chrysochloris asiatica_Chrysochloridae       | +               | +               | +          | +               | GCF_000296735.1 |
| Craseonycteris thonglongyai_Craseonycteridae | +               | +               | +          | +               | +               |
| Cricetus cricetus_Cricetidae                 | +               | +               | +          | +               | +               |
| Dasyprocta punctata_Dasyproctidae            | GCA_004363535.1 | +               | +          | +               | +               |
| Dasyuridae_Dasyuridae                        | +               | +               | +          | +               | +               |
| Didelphidae_Didelphidae                      | +               | +               | +          | +               | +               |
| Dinomys branickii_Dinomyidae                 | +               | +               | +          | GCA_004027595.1 | +               |
| Dipodomys_Heteromyidae                       | +               | +               | +          | +               | +               |
| Elephas maximus_Elephantidae                 | +               | +               | +          | +               | +               |
| Emballonuridae_Emballonuridae                | +               | +               | +          | +               | +               |
| Eschrichtius robustus_Eschrichtiidae         | +               | +               | +          | +               | +               |
| Viverridae_Viverridae                        | +               | +               | +          | +               | +               |
| Gliridae_Gliridae                            | +               | GCA_004027185.1 | +          | GCA_004027185.1 | -               |
| Heterocephalus glaber_Bathyergidae           | GCA_000247695.1 | +               | +          | +               | +               |
| Jaculus jaculus_Dipodidae                    | GCA_000280705.1 | GCA_000280705.1 | +          | +               | +               |
| Peramelidae_Peramelidae                      | +               | +               | +          | +               | +               |
| Manis pentadactyla_Manidae                   | +               | +               | +          | +               | +               |
| Manis tricuspis_Manidae                      | +               | +               | +          | GCA_004765945.1 | +               |
| Mustelidae_Mustelidae                        | +               | GCA_000215625.1 | +          | +               | +               |
| Miniopterus_Vespertilionidae                 | +               | +               | +          | GCF_001595765.1 | +               |
| Myocastor coypus_Myocastoridae               | +               | +               | +          | +               | +               |
| Myotis lucifugus_Vespertilionidae            | +               | +               | +          | +               | +               |
| Myzopoda aurita_Myzopodidae                  | +               | +               | AY834649.1 | -               | +               |
| Nandinia binotata_Nandiniidae                | +               | +               | +          | +               | -               |
| Noctilio_Noctilionidae                       | +               | +               | +          | +               | +               |
| Ochotona_Ochotonidae                         | +               | +               | +          | +               | +               |
| Ctenomyidae_Ctenomyidae                      | -               | GCA_004027165.1 | +          | +               | +               |
| Odobenus rosmarus_Odobenidae                 | +               | +               | +          | +               | +               |
| Ornithorhynchus anatinus_Ornithorhynchidae   | +               | GCA_004115215.4 | -          | +               | GCA_004115215.4 |

|                                       |                 |                 |   |   |   |
|---------------------------------------|-----------------|-----------------|---|---|---|
| Nesomyidae_Nesomyidae                 | +               | +               | + | + | + |
| Erinaceidae_Erinaceidae               | +               | +               | + | + | + |
| Viverridae_Viverridae                 | +               | GCA_004024585.1 | + | + | + |
| Procyon lotor_Procyonidae             | +               | +               | + | + | + |
| Rhinopoma hardwickii_Rhinopomatidae   | +               | +               | + | + | + |
| Solenodon paradoxus_Solenodontidae    | +               | +               | + | + | + |
| Sorex_Soricidae                       | +               | +               | + | + | + |
| Spalacidae_Spalacidae                 | +               | +               | + | + | + |
| Suricata suricatta_Herpestidae        | +               | GCA_006229205.1 | + | + | + |
| Talpidae_Talpidae                     | +               | +               | + | + | + |
| Tapirus indicus_Tapiridae             | +               | +               | + | + | + |
| Thryonomys swinderianus_Thryonomyidae | GCA_004025085.1 | +               | + | + | - |

Sample gap information (continuous)

| Species_famality                             | DMP1            | EDG1            | FBN1            | GHR             | PLCB4           |
|----------------------------------------------|-----------------|-----------------|-----------------|-----------------|-----------------|
| Ailurus fulgens_Ailuridae                    | +               | GCA_002007465.1 | +               | +               | GCA_002007465.1 |
| Chrysochloridae_Chrysochloridae              | +               | +               | GCF_000296735.1 | +               | +               |
| Aplodontia rufa_Aplodontiidae                | +               | +               | +               | +               | +               |
| Arctocephalus forsteri_Otariidae             | +               | +               | GU931076.1      | +               | +               |
| Bradypus tridactylus_Bradypodidae            | +               | GCA_004027775.1 | +               | +               | +               |
| Capromys pilorides_Capromyidae               | +               | +               | +               | +               | +               |
| Ceratotherium simum_Rhinocerotidae           | +               | +               | +               | +               | +               |
| Chinchilla lanigera_Chinchillidae            | +               | GCF_000276665.1 | +               | +               | +               |
| Chrysochloris asiatica_Chrysochloridae       | +               | +               | +               | +               | +               |
| Craseonycteris thonglongyai_Craseonycteridae | GCA_004027555.1 | +               | +               | +               | +               |
| Cricetus cricetus_Cricetidae                 | +               | +               | +               | +               | +               |
| Dasyprocta punctata_Dasyproctidae            | +               | +               | +               | +               | +               |
| Dasyuridae_Dasyuridae                        | +               | +               | +               | +               | +               |
| Didelphidae_Didelphidae                      | +               | +               | +               | GCF_000002295.2 | +               |
| Dinomys branickii_Dinomyidae                 | +               | GCA_004027595.1 | +               | +               | +               |
| Dipodomys_Heteromyidae                       | +               | +               | +               | +               | +               |

|                                            |   |                 |                 |                 |                 |
|--------------------------------------------|---|-----------------|-----------------|-----------------|-----------------|
| Elephas maximus_Elephantidae               | + | +               | +               | +               | +               |
| Emballonuridae_Emballonuridae              | + | AY834563.1      | +               | +               | +               |
| Eschrichtius robustus_Eschrichtiidae       | + | +               | +               | +               | +               |
| Viverridae_Viverridae                      | + | +               | GCA_004024585.1 | +               | +               |
| Gliridae_Gliridae                          | + | +               | +               | +               | +               |
| Heterocephalus glaber_Bathyergidae         | + | +               | +               | +               | +               |
| Jaculus jaculus_Dipodidae                  | + | GCA_000280705.1 | +               | +               | +               |
| Peramelidae_Peramelidae                    | + | +               | +               | +               | +               |
| Manis pentadactyla_Manidae                 | + | +               | +               | +               | +               |
| Manis tricuspis_Manidae                    | + | +               | +               | +               | +               |
| Mustelidae_Mustelidae                      | + | +               | +               | +               | +               |
| Miniopterus_Vespertilionidae               | + | GCF_001595765.1 | +               | +               | +               |
| Myocastor coypus_Myocastoridae             | + | +               | +               | +               | +               |
| Myotis lucifugus_Vespertilionidae          | + | +               | +               | +               | +               |
| Myzopoda aurita_Myzopodidae                | + | +               | -               | +               | +               |
| Nandinia binotata_Nandiniidae              | + | -               | GU931063.1      | +               | +               |
| Noctilio_Noctilionidae                     | + | +               | GCA_004026585.1 | GCA_004026585.1 | +               |
| Ochotona_Ochotonidae                       | + | +               | +               | +               | GCF_000292845.1 |
| Ctenomyidae_Ctenomyidae                    | + | GCA_004027165.1 | +               | +               | +               |
| Odobenus rosmarus_Odobenidae               | + | +               | +               | +               | +               |
| Ornithorhynchus anatinus_Ornithorhynchidae | + | +               | GCA_004115215.4 | +               | -               |
| Nesomyidae_Nesomyidae                      | + | +               | +               | +               | +               |
| Erinaceidae_Erinaceidae                    | + | +               | GCF_000296755.1 | +               | +               |
| Viverridae_Viverridae                      | + | +               | +               | +               | +               |
| Procyon lotor_Procyonidae                  | + | +               | +               | +               | GCA_015708975.1 |
| Rhinopoma hardwickii_Rhinopomatidae        | + | AY834561.1      | -               | +               | +               |
| Solenodon paradoxus_Solenodontidae         | + | +               | GCA_004363575.1 | +               | +               |
| Sorex_Soricidae                            | + | +               | +               | +               | +               |
| Spalacidae_Spalacidae                      | + | +               | +               | +               | +               |
| Suricata suricatta_Herpestidae             | + | +               | +               | +               | +               |

|                                       |   |   |                 |   |   |
|---------------------------------------|---|---|-----------------|---|---|
| Talpidae_Talpidae                     | + | + | GCF_000260355.1 | + | + |
| Tapirus indicus_Tapiridae             | + | + | +               | + | + |
| Thryonomys swinderianus_Thryonomyidae | + | + | +               | + | + |

Sample gap information (continuous)

| Species_famality                             | PNOC            | RAG2            | TYR1            | VWF |
|----------------------------------------------|-----------------|-----------------|-----------------|-----|
| Ailurus fulgens_Ailuridae                    | +               | +               | GCA_002007465.1 | +   |
| Chrysochloridae_Chrysochloridae              | +               | +               | +               | +   |
| Aplodontia rufa_Aplodontiidae                | +               | +               | +               | +   |
| Arctocephalus forsteri_Otariidae             | +               | +               | +               | +   |
| Bradypus tridactylus_Bradypodidae            | +               | +               | -               | +   |
| Capromys pilorides_Capromyidae               | +               | +               | -               | +   |
| Ceratotherium simum_Rhinocerotidae           | +               | +               | +               | +   |
| Chinchilla lanigera_Chinchillidae            | -               | GCF_000276665.1 | GCF_000276665.1 | +   |
| Chrysochloris asiatica_Chrysochloridae       | +               | +               | +               | +   |
| Craseonycteris thonglongyai_Craseonycteridae | +               | +               | GCA_004027555.1 | +   |
| Cricetus cricetus_Cricetidae                 | GCF_000223135.1 | +               | +               | +   |
| Dasyprocta punctata_Dasyproctidae            | -               | +               | GCA_004363535.1 | +   |
| Dasyuridae_Dasyuridae                        | GCF_902635505.1 | +               | +               | +   |
| Didelphidae_Didelphidae                      | +               | +               | +               | +   |
| Dinomys branickii_Dinomyidae                 | +               | +               | +               | +   |
| Dipodomys_Heteromyidae                       | +               | +               | +               | +   |
| Elephas maximus_Elephantidae                 | GCA_014332765.1 | +               | +               | +   |
| Emballonuridae_Emballonuridae                | AY834587.1      | +               | +               | +   |
| Eschrichtius robustus_Eschrichtiidae         | +               | +               | +               | +   |
| Viverridae_Viverridae                        | +               | +               | +               | +   |
| Gliridae_Gliridae                            | -               | +               | +               | +   |
| Heterocephalus glaber_Bathyergidae           | +               | +               | +               | +   |
| Jaculus jaculus_Dipodidae                    | +               | GCA_000280705.1 | +               | +   |
| Peramelidae_Peramelidae                      | +               | +               | +               | +   |
| Manis pentadactyla_Manidae                   | +               | +               | -               | +   |



|                                            |                 |                 |                 |                 |
|--------------------------------------------|-----------------|-----------------|-----------------|-----------------|
| Manis tricuspis_Manidae                    | +               | GCA_004765945.1 | +               | +               |
| Mustelidae_Mustelidae                      | GCA_000215625.1 | +               | +               | +               |
| Miniopterus_Vespertilionidae               | GCF_001595765.1 | +               | +               | +               |
| Myocastor coypus_Myocastoridae             | +               | +               | +               | +               |
| Myotis lucifugus_Vespertilionidae          | +               | +               | +               | +               |
| Myzopoda aurita_Myzopodidae                | +               | +               | -               | -               |
| Nandinia binotata_Nandiniidae              | +               | +               | +               | +               |
| Noctilio_Noctilionidae                     | +               | +               | GCA_004026585.1 | +               |
| Ochotona_Ochotonidae                       | +               | +               | +               | +               |
| Ctenomyidae_Ctenomyidae                    | -               | +               | GCA_004027165.1 | +               |
| Odobenus rosmarus_Odobenidae               | +               | +               | +               | +               |
| Ornithorhynchus anatinus_Ornithorhynchidae | -               | +               | +               | +               |
| Nesomyidae_Nesomyidae                      | +               | GCA_004027575.1 | +               | +               |
| Erinaceidae_Erinaceidae                    | -               | +               | +               | +               |
| Viverridae_Viverridae                      | +               | +               | +               | +               |
| Procyon lotor_Procyonidae                  | +               | +               | +               | +               |
| Rhinopoma hardwickii_Rhinopomatidae        | +               | +               | +               | +               |
| Solenodon paradoxus_Solenodontidae         | +               | +               | +               | +               |
| Sorex_Soricidae                            | GCF_000181275.1 | +               | +               | GCF_000181275.1 |
| Spalacidae_Spalacidae                      | +               | +               | +               | +               |
| Suricata suricatta_Herpestidae             | +               | +               | +               | +               |
| Talpidae_Talpidae                          | -               | +               | +               | +               |
| Tapirus indicus_Tapiridae                  | +               | +               | GCA_004024905.1 | +               |
| Thryonomys swinderianus_Thryonomyidae      | -               | +               | +               | +               |

Note: #, the sample sequence has been used in Meredith *et al.* (6); -, the sample sequence is still gap.

**Supplementary Table S2. The species name, tissue and origin of sample.**

| Sample name                 | Tissue or blood | Origin                  | Donated or collected | Accession No.                                                                                                                                                                                                                                                                                                                                                                                                                                                                                                                                                                                                                                                                                                                                                                                                                    |
|-----------------------------|-----------------|-------------------------|----------------------|----------------------------------------------------------------------------------------------------------------------------------------------------------------------------------------------------------------------------------------------------------------------------------------------------------------------------------------------------------------------------------------------------------------------------------------------------------------------------------------------------------------------------------------------------------------------------------------------------------------------------------------------------------------------------------------------------------------------------------------------------------------------------------------------------------------------------------|
| <i>Nycticebus sp.</i>       | blood           | Shijiazhuang ZOO, China | donated              | OR503106,OR503119,OR503153,OR503165,OR503182,OR503193,OR503203,OR503216,OR503229,OR503240,OR503252,OR503265,OR503290,OR503297,OR503315,OR503330,OR503341,OR503421,OR503432,OR503444,OR503457,OR503466,OR503486,OR503499,OR503518,OR503530,OR503548,OR503559,OR503569,OR503577,OR503587,OR503599,OR503611,OR503631,OR503639,OR503650,OR503660,OR503671,OR503680,OR503691,OR503703,OR503710,OR503720,OR503729,OR503739,OR503750,OR503757,OR503769,OR503779,OR503790,OR503800,OR503812,OR503822,OR503830,OR503850,OR503859,OR503868,OR503880,OR503888,OR503898,OR503911,OR503920,OR503930,OR503940,OR503950,OR503961,OR503968,OR503978,OR503988,OR503998,OR504009,OR504022,OR504032,OR504042,OR504053,OR504060                                                                                                                      |
| <i>Paguma larvata</i>       | blood           | Shijiazhuang ZOO, China | donated              | OR503110,OR503123,OR503132,OR503144,OR503155,OR503168,OR503186,OR503196,OR503207,OR503220,OR503232,OR503244,OR503256,OR503269,OR503285,OR503300,OR503307,OR503322,OR503334,OR503344,OR503355,OR503372,OR503384,OR503391,OR503400,OR503407,OR503424,OR503435,OR503447,OR503460,OR503468,OR503478,OR503489,OR503502                                                                                                                                                                                                                                                                                                                                                                                                                                                                                                                |
| <i>Ateles geoffroyi</i>     | muscle          | Beijing ZOO, China      | collected            | OR503107,OR503120,OR503129,OR503141,OR503154,OR503166,OR503173,OR503183,OR503194,OR503204,OR503217,OR503241,OR503253,OR503266,OR503282,OR503291,OR503298,OR503316,OR503320,OR503331,OR503342,OR503352,OR503365,OR503381,OR503405,OR503414,OR503422,OR503433,OR503445,OR503458,OR503467,OR503476,OR503487,OR503500,OR503511,OR503519,OR503531,OR503541,OR503549,OR503560,OR503570,OR503578,OR503588,OR503600,OR503612,OR503622,OR503632,OR503640,OR503651,OR503661,OR503672,OR503681,OR503692,OR503704,OR503711,OR503721,OR503730,OR503740,OR503751,OR503758,OR503770,OR503780,OR503791,OR503801,OR503813,OR503831,OR503841,OR503851,OR503860,OR503869,OR503881,OR503889,OR503899,OR503912,OR503921,OR503931,OR503941,OR503951,OR503962,OR503969,OR503979,OR503989,OR503999,OR504010,OR504023,OR504033,OR504043,OR504054,OR504061 |
| <i>Chiropotes israelita</i> | muscle          | Beijing ZOO, China      | collected            | OR503108,OR503121,OR503130,OR503142,OR503167,OR503174,OR503184,OR503195,OR503205,OR503218,OR503230,OR503242,OR503254,OR503267,OR503277,OR503283,OR503299,OR503                                                                                                                                                                                                                                                                                                                                                                                                                                                                                                                                                                                                                                                                   |

|                                 |        |                                    |           |                                                                                                                                                                                                                                                                                                                                                                                                                                                                                                                                                                                                                                                                                                                                                 |
|---------------------------------|--------|------------------------------------|-----------|-------------------------------------------------------------------------------------------------------------------------------------------------------------------------------------------------------------------------------------------------------------------------------------------------------------------------------------------------------------------------------------------------------------------------------------------------------------------------------------------------------------------------------------------------------------------------------------------------------------------------------------------------------------------------------------------------------------------------------------------------|
|                                 |        |                                    |           | 306,OR503317,OR503321,OR503332,OR503343,OR503353,OR503366,OR503382,OR503406,OR503423,OR503434,OR503446,OR503459,OR503477,OR503488,OR503501,OR503512,OR503520,OR503532,OR503542,OR503550,OR503561,OR503571,OR503579,OR503589,OR503601,OR503613,OR503623,OR503633,OR503641,OR503652,OR503662,OR503673,OR503682,OR503693,OR503705,OR503712,OR503722,OR503731,OR503741,OR503752,OR503759,OR503771,OR503781,OR503792,OR503802,OR503814,OR503823,OR503832,OR503842,OR503852,OR503861,OR503870,OR503882,OR503890,OR503900,OR503906,OR503913,OR503922,OR503932,OR503942,OR503952,OR503963,OR503970,OR503980,OR503990,OR504000,OR504011,OR504018,OR504024,OR504034,OR504044,OR504055,OR504062                                                            |
| <i>Suricata suricatta</i>       | muscle | Beijing ZOO, China                 | collected | OR503117,OR503139,OR503151,OR503163,OR503191,OR503201,OR503214,OR503227,OR503238,OR503250,OR503263,OR503275,OR503280,OR503304,OR503313,OR503328,OR503339,OR503350,OR503363,OR503379,OR503397,OR503412,OR503442,OR503455,OR503484,OR503497,OR503509,OR503516,OR503528,OR503539,OR503557,OR503567,OR503585,OR503597,OR503609,OR503620,OR503630,OR503648,OR503658,OR503669,OR503678,OR503689,OR503701,OR503727,OR503737,OR503748,OR503767,OR503777,OR503788,OR503810,OR503821,OR503839,OR503857,OR503866,OR503878,OR503918,OR503938,OR503948,OR503959,OR503966,OR503986,OR503996,OR504007,OR504041,OR504051                                                                                                                                        |
| <i>Herpestes sp.</i>            | muscle | Beijing ZOO, China                 | collected | OR503118,OR503128,OR503140,OR503152,OR503164,OR503181,OR503192,OR503202,OR503215,OR503228,OR503239,OR503251,OR503264,OR503276,OR503281,OR503296,OR503305,OR503314,OR503329,OR503340,OR503351,OR503364,OR503380,OR503389,OR503398,OR503404,OR503413,OR503431,OR503443,OR503456,OR503475,OR503485,OR503498,OR503510,OR503517,OR503529,OR503540,OR503558,OR503568,OR503586,OR503598,OR503610,OR503621,OR503649,OR503659,OR503670,OR503679,OR503690,OR503702,OR503719,OR503728,OR503738,OR503749,OR503768,OR503778,OR503789,OR503799,OR503811,OR503840,OR503858,OR503867,OR503879,OR503887,OR503897,OR503905,OR503919,OR503929,OR503939,OR503949,OR503960,OR503967,OR503977,OR503987,OR503997,OR504008,OR504017,OR504031,OR504052,OR504059,OR504069 |
| <i>Typhlomys daloushanensis</i> | muscle | Sichuan Academy of Forestry, China | donated   | OR503109,OR503122,OR503131,OR503143,OR503175,OR503185,OR503206,OR503219,OR503231,OR503243,OR503255,OR503268,OR503284,OR503333,OR503354,OR503383,OR503390,OR503399                                                                                                                                                                                                                                                                                                                                                                                                                                                                                                                                                                               |
| <i>Taphozous</i>                | muscle | Xishuangbanna                      | collected | OR503111,OR503133,OR503145,OR503156,OR503176,OR503197,OR503208,OR503221,OR50323                                                                                                                                                                                                                                                                                                                                                                                                                                                                                                                                                                                                                                                                 |

|                                |        |                                              |           |                                                                                                                                                                                                                                                                                                                                                                                                                                                                                                                                                                                                                                                                                                                                                                                                                                                                                        |
|--------------------------------|--------|----------------------------------------------|-----------|----------------------------------------------------------------------------------------------------------------------------------------------------------------------------------------------------------------------------------------------------------------------------------------------------------------------------------------------------------------------------------------------------------------------------------------------------------------------------------------------------------------------------------------------------------------------------------------------------------------------------------------------------------------------------------------------------------------------------------------------------------------------------------------------------------------------------------------------------------------------------------------|
| <i>melanopogon</i>             |        | National Nature Reserve, China               | d         | 3,OR503257,OR503270,OR503286,OR503292,OR503301,OR503318,OR503323,OR503345,OR503356,OR503367,OR503373,OR503385,OR503392,OR503401,OR503415,OR503448,OR503461,OR503469,OR503479,OR503490,OR503503,OR503521,OR503533,OR503543,OR503551,OR503562,OR503572,OR503580,OR503590,OR503602,OR503614,OR503624,OR503634,OR503642,OR503653,OR503663,OR503674,OR503683,OR503694,OR503706,OR503723,OR503732,OR503742,OR503753,OR503760,OR503772,OR503782,OR503803,OR503815,OR503833,OR503843,OR503862,OR503871,OR503923,OR503933,OR503943,OR503953,OR503971,OR503981,OR503991,OR504001,OR504012,OR504025,OR504035,OR504045,OR504063                                                                                                                                                                                                                                                                    |
| <i>Aselliscus stoliczkanus</i> | muscle | Xishuangbanna National Nature Reserve, China | collected | OR503112,OR503124,OR503134,OR503146,OR503157,OR503169,OR503177,OR503187,OR503209,OR503222,OR503234,OR503245,OR503258,OR503271,OR503278,OR503293,OR503302,OR503308,OR503324,OR503346,OR503357,OR503368,OR503374,OR503386,OR503393,OR503402,OR503416,OR503425,OR503436,OR503449,OR503470,OR503480,OR503491,OR503504,OR503522,OR503534,OR503552,OR503563,OR503573,OR503591,OR503603,OR503615,OR503625,OR503635,OR503643,OR503654,OR503664,OR503675,OR503684,OR503695,OR503713,OR503733,OR503743,OR503754,OR503761,OR503783,OR503793,OR503804,OR503816,OR503824,OR503834,OR503844,OR503872,OR503891,OR503901,OR503907,OR503914,OR503924,OR503934,OR503944,OR503954,OR503972,OR503982,OR504002,OR504013,OR504026,OR504036,OR504046,OR504064                                                                                                                                                 |
| <i>Chaerephon plicatus</i>     | muscle | Xishuangbanna National Nature Reserve, China | collected | OR503113,OR503135,OR503147,OR503158,OR503170,OR503178,OR503188,OR503198,OR503210,OR503223,OR503235,OR503246,OR503259,OR503272,OR503287,OR503294,OR503303,OR503309,OR503319,OR503325,OR503335,OR503347,OR503358,OR503369,OR503375,OR503387,OR503394,OR503403,OR503408,OR503417,OR503426,OR503437,OR503450,OR503462,OR503471,OR503481,OR503492,OR503505,OR503513,OR503523,OR503535,OR503544,OR503553,OR503564,OR503574,OR503581,OR503592,OR503604,OR503616,OR503626,OR503636,OR503644,OR503655,OR503665,OR503676,OR503685,OR503696,OR503707,OR503714,OR503734,OR503744,OR503755,OR503762,OR503773,OR503784,OR503794,OR503805,OR503817,OR503825,OR503835,OR503845,OR503853,OR503863,OR503873,OR503883,OR503892,OR503902,OR503908,OR503915,OR503925,OR503935,OR503945,OR503955,OR503964,OR503973,OR503983,OR503992,OR504003,OR504014,OR504019,OR504027,OR504037,OR504047,OR504056,OR504065 |
| <i>Hipposideros larvatus</i>   | muscle | Xishuangbanna National Nature Reserve, China | collected | OR503114,OR503125,OR503136,OR503148,OR503159,OR503171,OR503179,OR503199,OR503211,OR503224,OR503247,OR503260,OR503288,OR503310,OR503326,OR503359,OR503370,OR503376,OR503395,OR503409,OR503418,OR503427,OR503438,OR503451,OR503463,OR503472,OR5                                                                                                                                                                                                                                                                                                                                                                                                                                                                                                                                                                                                                                          |

|                           |        |                   |           |                                                                                                                                                                                                                                                                                                                                                                                                                                                                                                                                                                                                                                                                                                                                                                   |
|---------------------------|--------|-------------------|-----------|-------------------------------------------------------------------------------------------------------------------------------------------------------------------------------------------------------------------------------------------------------------------------------------------------------------------------------------------------------------------------------------------------------------------------------------------------------------------------------------------------------------------------------------------------------------------------------------------------------------------------------------------------------------------------------------------------------------------------------------------------------------------|
|                           |        |                   |           | 03482,OR503493,OR503506,OR503524,OR503536,OR503545,OR503554,OR503565,OR503575,OR503582,OR503593,OR503605,OR503617,OR503627,OR503637,OR503645,OR503656,OR503666,OR503677,OR503686,OR503697,OR503708,OR503715,OR503724,OR503735,OR503745,OR503756,OR503763,OR503774,OR503785,OR503795,OR503806,OR503818,OR503826,OR503836,OR503846,OR503854,OR503864,OR503874,OR503884,OR503893,OR503903,OR503909,OR503916,OR503926,OR503936,OR503946,OR503956,OR503974,OR503984,OR503993,OR504004,OR504015,OR504020,OR504028,OR504038,OR504048,OR504057,OR504066                                                                                                                                                                                                                   |
| <i>Myocastor coypus</i>   | muscle | Pet market, China | collected | OR503115,OR503126,OR503137,OR503149,OR503160,OR503189,OR503212,OR503225,OR503236,OR503248,OR503261,OR503273,OR503279,OR503289,OR503311,OR503327,OR503336,OR503348,OR503360,OR503377,OR503388,OR503396,OR503410,OR503419,OR503428,OR503439,OR503452,OR503464,OR503473,OR503494,OR503514,OR503525,OR503537,OR503546,OR503555,OR503566,OR503576,OR503583,OR503594,OR503606,OR503618,OR503628,OR503646,OR503657,OR503667,OR503687,OR503698,OR503709,OR503716,OR503725,OR503746,OR503764,OR503775,OR503786,OR503796,OR503807,OR503819,OR503827,OR503837,OR503847,OR503855,OR503865,OR503875,OR503885,OR503894,OR503910,OR503917,OR503927,OR503937,OR503947,OR503957,OR503975,OR503985,OR503994,OR504005,OR504016,OR504021,OR504029,OR504039,OR504049,OR504058,OR504067 |
| <i>Petaurus breviceps</i> | muscle | Pet market, China | collected | OR503116,OR503127,OR503138,OR503150,OR503161,OR503172,OR503180,OR503190,OR503200,OR503213,OR503226,OR503237,OR503249,OR503262,OR503274,OR503295,OR503312,OR503337,OR503349,OR503361,OR503371,OR503378,OR503411,OR503420,OR503429,OR503440,OR503453,OR503495,OR503507,OR503526,OR503556,OR503584,OR503595,OR503607,OR503699,OR503717,OR503747,OR503765,OR503797,OR503808,OR503828,OR503848,OR503876,OR503886,OR503895,OR503904,OR503928,OR503958,OR503965,OR503976,OR503995,OR504006,OR504030,OR504040,OR504050,OR504068                                                                                                                                                                                                                                           |
| <i>Graphiurus kelleni</i> | muscle | Pet market, China | collected | OR503162,OR503338,OR503362,OR503430,OR503441,OR503454,OR503465,OR503474,OR503483,OR503496,OR503508,OR503515,OR503527,OR503538,OR503547,OR503596,OR503608,OR503619,OR503629,OR503638,OR503647,OR503668,OR503688,OR503700,OR503718,OR503726,OR503736,OR503766,OR503776,OR503787,OR503798,OR503809,OR503820,OR503829,OR503838,OR503849,OR503856,OR503877,OR503896                                                                                                                                                                                                                                                                                                                                                                                                    |

---

**Supplementary Table S3. The designed PCR primers information in this study.**

| No. | Marker   | Forward Primer (5'→3')           | Reverse Primer (5'→3')              | PL<br>(bp) | AT<br>(°C) |
|-----|----------|----------------------------------|-------------------------------------|------------|------------|
| 1*  | ANKHD1   | AACAGATYCGGCATCCTC               | GGTGGYAAAGAYTTATTTGCTGG             | 1011       | 61         |
| 2*  | ZNF281   | CTAGTGCRGAACCTGGGTC              | TGGCAACTGAGGTAACAG                  | 1063       | 59         |
| 3*  | KLHL25   | ATGTGYGACAAGATYACCAGG            | GTGGGGATGAGBGARTARGG                | 817        | 61         |
| 4*  | TAB2     | CATCTTTGCACATACATGGTGTACC        | CAGGKGGYTTATTDGGAGAAAC              | 848        | 59         |
| 5*  | ADNP     | GCACCTTACATAGCAAAGGC             | GATGTGCAAGTGCATCAGA                 | 1359       | 59         |
| 6*  | ARHGAP35 | GAGCGGTACATTMGAGAT               | TGACATTSCCYTCTATTGG                 | 1314       | 55         |
| 7*  | LRR8A    | TGGARCACTTTGTBTCTATCC            | TGCTGGAARCTGATGATCTC                | 1452       | 59         |
| 8*  | PROX1    | CGAAAAGAACAGAAGCGAGAGGAG         | TGRGATGACATCTTGGTCTCAGACT           | 910        | 59         |
| 9*  | RBBP6    | GTTCCAAACGDAGAGATGAAAGG          | TGTTTTGGCTYTTTTCCAATTCT             | 849        | 61         |
| 10* | FZD4     | ATGTGCCAATGTGCACRGAGAAGATCAAC    | GCMGACCARATCCACATGCC                | 910        | 59         |
| 11* | ZBTB6    | CTGCTTGYTCHACTTTCATGAGAG         | TGYTTYTTGAGRGCAGATTTGTG             | 1044       | 61         |
| 12* | SP3      | CAAGTCCAGTTTCAGGGAGTTRCAATTGGTGG | TGTAGATTTGGCAACTGACCAGTGCTTAGAC     | 877        | 55         |
| 13* | TRIM13   | AACAARATCAARRTCTCTCCCAAAATGCC    | TCCCAYTGACTRGTATCAAARTTYTT          | 613        | 61         |
| 14* | TTC30B   | GTSACCYTGACAACCAGGC              | GAARCATCTTTGGCRTARTACCAGG           | 908        | 61         |
| 15* | NR3C1    | ATTYCCWCARCAGGGCCAAA             | TCATCKCCAGATCCYTGGCA                | 827        | 57         |
| 16* | GJC1     | GGYTATGCCATYCAAYAAGATTGCC        | GAYTTGCTRCTRGCACTGCT                | 886        | 61         |
| 17* | MARCH7   | CARGGAGCRAGACCAAAAAGA            | AGAAATCKAAATCCYTGAG                 | 514        | 53         |
| 18* | NFE2L2   | GCTTCAGYGATTCTGARATGGAAG         | AGCATGCTGAASACYTCDAGAT              | 594        | 61         |
| 19* | GJA1     | CAGTGGTACATCTAYGGMTTCAGC         | GCTGGCTCTRCKGAAGG                   | 589        | 61         |
| 20* | CEBPZ    | ACARARCHTTGGCTCAGAA              | AGKGCCTDAGCATTTTWGA                 | 846        | 57         |
| 21* | DET1     | TACCAGGGCTGCCARGCA               | AGSAGGTCATCCTCATAGC                 | 538        | 59         |
| 22* | PLXNB2   | CAGCCTCTTCAAGGGCATCTG            | TGGCACTSCAGGTCCAYCTC                | 479        | 61         |
| 23* | HIPK2    | CCTTCAATCAAGTGCCTTCTGTAGTGTGAAG  | CCTTCAATCAAGTGCCTTCTGTAGTGTGAAG     | 475        | 61         |
| 24* | HIPK3    | ATGTTGCARACMAACATGGGAAATCCAGTGAC | TTCTCTGGTTTRAGGTCAGCATGAATTAACCAAG  | 523        | 61         |
| 25* | TMEM168  | GGATTGTCYATTGCYAGYAC             | CGCATYCCTTTRGATGCCAT                | 559        | 61         |
| 26* | WDR89    | ATTTGTGCTGGYACWGAAAAAATTG        | TGTGCATCYTCTCCWCCAG                 | 643        | 59         |
| 27* | ACKR4    | TCTGGRATGCAGTTTCTGGC             | TGKATGGCVACATCYATGCG                | 484        | 57         |
| 28* | Fbxo42   | GATYTGAATTGGGAYCTRAA             | GGATAGTACTTCACATTCTGYTTCTTGTCCATGAG | 613        | 57         |

|     |             |                                     |                                     |      |       |
|-----|-------------|-------------------------------------|-------------------------------------|------|-------|
| 29* | 1 EDG1      | CGCTAYATCAC SATGCTSAAGATG           | GTGTARATGATGGGGTTGG                 | 511  | 61    |
| 30* | MAPK6       | CAAAGCAAAGAAAARTCTGATAAGARAGGCAAGTC | GGGAYGCCTATRGAYTCAAGCTGC            | 598  | 61    |
| 31* | RNF146      | AAAGGTAAAAAGARCACTGAAATGTTAATTGCYGG | ATCCTCACTATCACTACTVGCRTCTG          | 554  | 61    |
| 32* | ZNF768      | GGYATCTGYGGRAAGAGCTT                | GGRCACTTRAAGGGCTTYTC                | 505  | 61    |
| 33# | CASR        | TCCGYTGAACTGGGTGGGCACMATTGCAGC      | CTGCCAVGCCTCAACYTTCTTGATGTCTGCACAGG | 770  | 63/55 |
| 34# | KERA        | GAGCTAGAGGAGGTACCTTCTCCATTGCCAAGAAG | AAGGTGCTGCAGRTKAGCAYTGATT           | 468  | 63/55 |
| 35# | KLHL28      | CCCCGACCTACATGCTTGCTAACTTAACCCACT   | GGAGCACAGCGAGGTCTGTGCATCAAGACTGTCTG | 832  | 63/55 |
| 36# | BCHE2       | TGGAATGCCACAAAATATGCAAATTC          | TCATARCCATGCATCACTCCCATCCAT         | 1175 | 63/55 |
| 37# | BTBD3       | ATCTATTGTGATGAAATTGAYTTGGCTGCGYACAC | GAGAAGTACTTGCTBARGTTCTGCC           | 794  | 63/55 |
| 38# | MYPN        | AGTCGAGCDGARCCYTCCTCCAACCCCT        | GGTGGAATTCCTACCACTATRCAATCCAACCTG   | 824  | 63/55 |
| 39# | STON2       | ACATCATGTCCTCYAGGCACTGGGGACC        | CCAAAACYGCCCGGTTCACTTTGGCTTTC       | 976  | 63/55 |
| 40# | ZNF318      | GAGAGAGCTAGCCAGGAYGGCAGTGG          | GCTGCATATGCCATGTARTGCCTATAKGCATCA   | 938  | 63/55 |
| 41# | MED13L      | CCAAGAACTCCCAGAGGWGGGGCACTGCGYAGTGG | TGRTTCTGVARGAGGAGGAGRAGGCT          | 539  | 63/55 |
| 42# | KCNJ2       | CGCTGGMGGTGGATGCTGGTYATCTTCTG       | CTGGGCTCTAGAGGYACRCKGCTGGTTGTG      | 1022 | 63/55 |
| 43# | ZNFX1       | TGAGRGCCTCTGGKGTTRACATARAAG         | AGGCTTCCATYTGRGAGTCATCCAGC          | 987  | 63/55 |
| 44# | BMP2        | CACCGAATTAATATTTATGAAATYATAAARCCTGC | CCCTCSACRACCATGTCCTGAT              | 671  | 63/55 |
| 45# | PLAGL2      | TGGCCACCCACTCAGCCCAGAAACCCACCAAGTG  | GGCCGCAGCTGCGYCCGGCTGAGGTGAG        | 905  | 63/55 |
| 46# | CHRNA6      | GACAAAGCTGAAATTGAYCTTCTMATCATTGG    | TCTTCATGTTTTCYGCTATGA               | 802  | 63/55 |
| 47# | ZC3H12C     | GGCCTTCCATCTGGAGTTCAYTTCCASCTCAGG   | TGGCKGCRGCSAGCTGCTGGGCRTC           | 1018 | 63/55 |
| 48# | KCNJ1       | GGAAGGTGYAACATHGARTTTGGCA           | TGGGARCAAAVCGGTARCCCCARAGCAC        | 844  | 63/55 |
| 49# | SETBP1      | CTCCAGCCCATCAGTGCTCTTCCAACCAAAACCC  | TGGCTGGAGAAGCCWGTGGCTTTGCCTGC       | 1130 | 63/55 |
| 50# | KCNJ6       | GTGGCCATYCACCAAGCCWAAGTTGCCTAAGC    | TTGGAGATCTCCAGAARGGACTCTG           | 809  | 63/55 |
| 51# | BMP10       | GGAACCAACAGTGAGTGGGAGAC             | AGGTGACGACRCCYTRTCTAAATAGAGGATGGAG  | 652  | 63/55 |
| 52# | ZNF691      | CCYGGAGAGTGGATGRCTCHRAGG            | AGCTGGARCTGTTGCTRAAGCTCT            | 574  | 63/55 |
| 53# | FRMD7       | TGTGAATGGAGTGCACGC                  | AGGTCAGCTTTACGACTSAGAGYAGGRCAAGGCCC | 792  | 63/55 |
| 54# | KIAA0355    | AARCTGACMTCCCGSTTCACMAAGAA          | AGCTGCTCACYAGACCCAAGCTGTAYAAGTCAG   | 793  | 63/55 |
| 55# | CDKN2AIP    | TGTTGAAAKCMAGTRTGAATAGTCA           | TTGCTTTTTCCACAGCCRGTGCCCAAT         | 832  | 63/55 |
| 56# | NP_689653.3 | GGAGGRCAGTCTCAGAAGGCGYTKCAGCC       | AGGAARGAAATAAARTGGGAGTCTCT          | 545  | 63/55 |
| 57# | DMRTA1      | TGGAATCAGGAAATGAAAGTGAGTGG          | CCYGAAAAGGCATAATCCARAGCWGG          | 532  | 63/55 |
| 58# | C3orf59     | TGCGCCACTCAGCCTTRTYCACTCTTGGC       | GCTCCAGCGTCAGCCKGTTGGCYGCCTTGACGTGC | 870  | 63/55 |
| 59# | GRIN2A      | CCAAAGSGAGCTCSCCCAGGGACAAGATCTACACC | AGGCATTTTCTGTACACRCGTCTAYTGCTGCAGG  | 1073 | 63/55 |

|     |               |                                      |                                      |      |       |
|-----|---------------|--------------------------------------|--------------------------------------|------|-------|
| 60# | COG8          | GCATTGTGAAYGAAGTGCGCCARTCCATGCAGCTG  | GGGCAGCARAGRCGCAGATCA                | 778  | 63/55 |
| 61# | ENPP4         | TCCTTYGAYGGYTTCCAGAGCTGACT           | GARCACTGGGTCATCCCRTRGRTCRCT          | 620  | 63/55 |
| 62# | FAM135A       | GCCTAAATCTYGTGCAAATTTGCCATTTCCAGG    | GTCCAAGTTAGGTTTGGAG                  | 1052 | 63/55 |
| 63# | FBX040        | CATGTCCCGCCACAAGCTGGCCAAGC           | CGAGCCCGCTTYCCACAGTAGCTCAC           | 867  | 63/55 |
| 64# | FZD6          | TGGTGTCCMAGGCATCTYAAGACTTCTGG        | AGGCCACTRAAGACTCCWATKCGAATCAT        | 791  | 63/55 |
| 65# | MET           | CTGTGCTTRCACCTGGCRTYCTTGCTTCTG       | GCMCCAGGCTTACTGACATABGCAGCTTG        | 970  | 63/55 |
| 66# | KIAA010       | TGGAGCCCMCCAGATCACATG                | GCCCCGGCGCATRGGYGTGTTGCCATAGAGACGACG | 878  | 63/55 |
| 67# | CASR2         | AGTGCCCHGATGACTTCTGGTCCAATGARAACCAC  | CTGCAGCGCACCTCCTCGATGGTG             | 874  | 63/55 |
| 68# | GPRC5C        | CTGCTGGGGACCCTGGGCCTCTTCTGCCTCG      | GAGGCTGGCTCRTCCATGGAAAABGCCTTG       | 788  | 63/55 |
| 69# | NPAS4         | GAGGCTGTGCTTCTCTTYAGCCTCCAYGAGCCC    | AGGGGAATGCTGAGACACCTGTCTCAAAGGCGG    | 1023 | 63/55 |
| 70# | PAPPA         | CGTGACCGAGGATGGGYGTGGGMATTCACACC     | GCCAGCTGCTGGTGGTGAAGTCRATCTGCTG      | 713  | 63/55 |
| 71# | POLR1B        | CTCTGCCAYGATGCBACMCCCTTCA            | TGTTTCATAGCTGCCAGYTCRGCTACAAAATACCG  | 556  | 63/55 |
| 72# | SCN8A         | TGGCCCGTATTGGGCGCATCYTGCGTCTGATC     | GCCACGAACCKCTCCTCCATCTG              | 763  | 63/55 |
| 73# | STOX2         | CGCCSTCTGCCTCAGGCTGCRTCAGGGAAAG      | CGGTCCTGGGTATGGCTGTGGCTTCGGTG        | 898  | 63/55 |
| 74# | SYT11         | GTRCTGGTGGTGTGYGTTSTCRGTGAC          | TGCAGSACCAGGTCYTSAGCTGGCTG           | 656  | 63/55 |
| 75# | C60RF60       | TGATGAGCAYGAATCTGCAATTCAGCCCTCA      | CCTATGGTTTTTCGYAAAATTGCTTCTTG        | 723  | 63/55 |
| 76# | NEDD9         | AAGCCYGTGGAGAAAGACATCTC              | TCTTGAGCTGYTCGCABAGCTGGTTGCTGGAG     | 334  | 63/55 |
| 77# | KL            | GCTCAYGCCAAAATCTGGCATCTCTAC          | TCTTGGTGGTCCCKGARACRAACCAGC          | 454  | 63/55 |
| 78# | GGPS1         | ATTGAAGTGACDGARATGTRCATA             | CTTTTGTTTTCRCTRATTCTTTGGAGTG         | 461  | 63/55 |
| 79# | MRPL16        | TGAAATGATGCGCCTGACRATCAACCGCT        | AGCATGTTGGCRGTGRCKATGCGCTC           | 366  | 63/55 |
| 80# | SIPA1L1-exon8 | GTGGCYGTSACCAGGTCCAGAG               | GTCCACCCKATCACRTRCTCTGCAGG           | 467  | 63/55 |
| 81# | GPR987-intro6 | ATTCAACTGAAAAGTGTRGAAGGAGGAGCTG      | GCCAACATCTGCCCTTGTGCAAATGSAGAACTCC   | 966  | 63/55 |
| 82# | HAS3          | AGCGGGCYTGCCAGTCTACTTTGGCTGYGTGCAG   | AAGCTATACTGYTCTGGCTTCTTCCC           | 835  | 63/55 |
| 83# | MED13         | GATCAAGAATATGGYCTGCTTAYACACCTCA      | TGACGYCCATGTTCTAATGCAAGGTAGCA        | 818  | 63/55 |
| 84# | PPARGC1A      | TCCACCCACAACCTCCTCCTCAYAAAGCCAACCAAG | GATCTACTGCCTGGGGACCKWGATCTTGACCTGG   | 912  | 63/55 |
| 85# | EHBP1         | TCTCTATCAAATMAGRGACATTTTCAGYGGCCAAG  | TCTGRATCAGAYTCTGTYTGCCTCAGGG         | 765  | 63/55 |
| 86# | NR4A2         | AGGCGCAGTATGGGTCCTCGCCTCAAGGAGCCAGC  | AGCAGCTGCGACGCGTGGCCGATCTGCAG        | 718  | 63/55 |
| 87# | TRIP12        | CCACARCCASAGGAYCCAGACAGAGCC          | GATGTYTCTGACTTAGAAGACCCTGGAAGAGACAG  | 743  | 63/55 |
| 88# | C17orf71      | TGAACCAAGTACTCCAGATCCTGCWCCTGC       | AAAGGAGCATCRGGAACYACAACAAAMAGCCTCAT  | 798  | 63/55 |
| 89# | GRM5          | GAGCCCATTGCWGCWGTGGTGTGGCTGCCT       | GTGGTGAAGGCGCTGCGYAC                 | 782  | 63/55 |
| 90# | HAS2          | CCTGGATCTCYTTCCTCAGCAGTGTGAGATACTGG  | ATGGTTTTCTTCCAGATGTGCCCCACCCAGC      | 664  | 63/55 |



|     |        |                                    |                                     |      |       |
|-----|--------|------------------------------------|-------------------------------------|------|-------|
| 91# | VCP1P1 | TCTGCCTGGCAAACMTTGTCTATAATGCTTCTG  | CAGCATCTTGRCTATCCATCTCTTCRGGCTCCTCC | 803  | 63/55 |
| 92# | ZNF192 | AGGCAGCGRGGRAATCCCACCCARGAGAGACG   | AGGCCAGTGTCCCATGAARGCTTCCCACATTC    | 668  | 63/55 |
| 93# | ZNF652 | AGCAGGRATGGCACAAGA                 | CTTCTCCTTYTTCTTCTGCCT               | 499  | 63/55 |
| 94# | TRPS1  | AGCCATTCTGCTCAGCAGCCRGTCCTGGTCAGCC | TGTCCGTGCAAAGATGCTGGCATATGCTGCACTG  | 727  | 63/55 |
| 95# | PCDH9  | TCTGAGAATCTGCCAAAGTATAGTACTGTGGGGG | AGCCTCCTTGGGAAGTGCCTCTGAGGCACTGAAG  | 1261 | 63/55 |
| 96# | KLHL15 | TCAAGCCGCATCCGYTCTGCCAAACC         | GAATCGCTGTAATGACCRTTGTAGCAAAGGCCTCC | 863  | 63/55 |
| 97# | KLHL23 | TTTCTGGATGCATTCAGAACATTTACTTGGATGG | TGGGKCCAAACAYGTAACRCCATAGCTCTCCC    | 898  | 63/55 |
| 98# | HDX    | ACGTGGGTYGGCAATAARAGAAGAAAAATGAG   | TCATCARCATCTCCAGTCTCCATTGCA         | 788  | 63/55 |

Note: \*, newly designed primers in this study. #, the primers from the Zhou et al. (Zhou et al., 2011).

**Supplementary Table S4. Likelihood ratio test of alternative topologies for dataset A DNA alignments as implemented in CONSEN package.**

| Tree topology                                         | ln L       | $\Delta$ ln L | SH probability | AU probability |
|-------------------------------------------------------|------------|---------------|----------------|----------------|
| <b>Laurastheria</b>                                   |            |               |                |                |
| (Chroptera, (Artiodactyla, (Perissodactyle, Ferae)))  | -1243820.9 | Best          | 0.894          | 0.763          |
| (Ferae, (Chiroptera, (Perissodactyle, Artiodactyla))) | -1243828.1 | 7.2           | 0.506          | 0.433          |
| (Chiroptera, ((Perissodactyle, Artiodactyla), Ferae)) | -1243830.0 | 9.1           | 0.480          | 0.240          |
| (Chroptera, (Perissodactyle, (Artiodactyla, Ferae)))  | -1243834.6 | 13.7          | 0.279          | 0.102          |
| ((Chiroptera, Perissodactyle), (Artiodactyla, Ferae)) | -1243835.0 | 14.1          | 0.294          | 0.189          |
| <b>Paenungulata</b>                                   |            |               |                |                |
| (Sirenia, (Proboscidea, Hyracoidea))                  | -1243819.9 | Best          | 0.783          | 0.703          |
| (Proboscidea, (Sirenia, Hyracoidea))                  | -1243823.7 | 3.7           | 0.499          | 0.421          |
| (Hyracoidea, (Proboscidea, Sirenia))                  | -1243830.0 | 10.0          | 0.238          | 0.130          |
| <b>Placenticia root</b>                               |            |               |                |                |
| Afrotheria                                            | -1243828.5 | Best          | 0.722          | 0.618          |
| Atlantogenata                                         | -1243830.0 | 1.5           | 0.571          | 0.510          |
| Xenartheria                                           | -1243835.2 | 6.7           | 0.291          | 0.150          |
| <b>Rodentia</b>                                       |            |               |                |                |
| (Sciuromorpha, (Mouse-related clade, Hystricomorpha)) | -1243817.5 | Best          | 0.806          | 0.810          |
| (Mouse-related clade, (Sciuromorpha, Hystricomorpha)) | -1243830.0 | 12.5          | 0.194          | 0.190          |
| <b>Scandentia</b>                                     |            |               |                |                |
| Sister to Glires                                      | -1243830.0 | Best          | 0.791          | 0.788          |
| Sister to Primatomorpha                               | -1243838.2 | 8.2           | 0.209          | 0.212          |

Abbreviations: ln L, log-likelihood;  $\Delta$  ln L, the difference between best topology and other topology; SH probability, Shimodaira-Hasegawa probability; AU probability, approximately unbiased probability.

**Supplementary Table S5. Likelihood ratio test of alternative topologies for dataset A protein sequences as implemented in CONSENL package.**

| Tree topology                                         | ln L          | $\Delta$ ln L | SH probability | AU probability |
|-------------------------------------------------------|---------------|---------------|----------------|----------------|
| Laurastheria                                          |               |               |                |                |
| (Ferae, (Chiroptera, (Perissodactyle, Artiodactyla))) | -<br>660387.6 | Best          | 0.951          | 0.858          |
| (Chiroptera, ((Perissodactyle, Artiodactyla), Ferae)) | -<br>660400.0 | 12.4          | 0.354          | 0.134          |
| (Chroptera, (Artiodactyla, (Perissodactyle, Ferae)))  | -<br>660401.7 | 14.4          | 0.299          | 0.244          |
| (Chroptera, (Perissodactyle, (Artiodactyla, Ferae)))  | -<br>660413.3 | 25.7          | 0.052          | <b>0.041</b>   |
| ((Chiroptera, Perissodactyle), (Artiodactyla, Ferae)) | -<br>660416.1 | 28.5          | <b>0.047</b>   | <b>0.022</b>   |
| Paenungulata                                          |               |               |                |                |
| (Sirenia, (Proboscidea, Hyracoidea))                  | -<br>660393.7 | Best          | 0.787          | 0.683          |
| (Hyracoidea, (Proboscidea, Sirenia))                  | -<br>660400.0 | 6.3           | 0.505          | 0.434          |
| (Proboscidea, (Sirenia, Hyracoidea))                  | -<br>660405.5 | 11.8          | 0.364          | 0.242          |
| Placencia root                                        |               |               |                |                |
| Atlantogenata                                         | -<br>660400.0 | Best          | 0.931          | 0.883          |
| Afrotheria                                            | -<br>660414.0 | 14.0          | 0.186          | 0.165          |
| Xenartheria                                           | -<br>660414.6 | 14.6          | 0.171          | 0.154          |
| Rodentia                                              |               |               |                |                |
| (Sciuromorpha, (Mouse-related clade, Hystricomorpha)) | -<br>660385.6 | Best          | 0.783          | 0.801          |
| (Mouse-related clade, (Sciuromorpha, Hystricomorpha)) | -<br>660400.0 | 14.4          | 0.217          | 0.199          |
| Scandentia                                            |               |               |                |                |
| Sister to Glires                                      | -<br>660400.0 | Best          | 0.699          | 0.699          |
| Sister to Primatomorpha                               | -<br>660405.7 | 5.7           | 0.301          | 0.301          |

Abbreviations: ln L, log-likelihood;  $\Delta$  ln L, the difference between best topology and other topology; SH probability, Shimodaira-Hasegawa probability; AU probability, approximately unbiased probability.

**Supplementary Table S6. Likelihood ratio test of alternative topologies for dataset B DNA sequences as implemented in CONSEN package.**

| Tree topology                                         | ln L           | $\Delta$ ln L | SH probability | AU probability |
|-------------------------------------------------------|----------------|---------------|----------------|----------------|
| Laurastheria                                          |                |               |                |                |
| (Chroptera, (Perissodactyle, (Artiodactyla, Ferae)))  | -<br>1120805.2 | Best          | 0.965          | 0.895          |
| (Chroptera, (Artiodactyla, (Perissodactyle, Ferae)))  | -<br>1120823.9 | 18.7          | 0.323          | 0.191          |
| (Chiroptera, ((Perissodactyle, Artiodactyla), Ferae)) | -<br>1120825.4 | 20.2          | 0.275          | 0.144          |
| ((Chiroptera, Perissodactyle), (Artiodactyla, Ferae)) | -<br>1120829.8 | 24.6          | 0.218          | 0.211          |
| (Ferae, (Chiroptera, (Perissodactyle, Artiodactyla))) | -<br>1120832.2 | 27.0          | 0.168          | 0.192          |
| Paenungulata                                          |                |               |                |                |
| (Sirenia, (Proboscidea, Hyracoidea))                  | -<br>1120813.3 | Best          | 0.844          | 0.774          |
| (Proboscidea, (Sirenia, Hyracoidea))                  | -<br>1120820.7 | 7.4           | 0.419          | 0.348          |
| (Hyracoidea, (Proboscidea, Sirenia))                  | -<br>1120825.4 | 12.1          | 0.272          | 0.166          |
| Placencia root                                        |                |               |                |                |
| Xenarthria                                            | -<br>1120820.6 | Best          | 0.734          | 0.632          |
| Atlantogenata                                         | -<br>1120822.5 | 1.9           | 0.579          | 0.475          |
| Afrotheria                                            | -<br>1120825.4 | 4.8           | 0.453          | 0.298          |
| Rodentia                                              |                |               |                |                |
| Sciuromorpha, (Mouse-related clade, Hystricomorpha)   | -<br>1120825.4 | Best          | 0.580          | 0.602          |
| Mouse-related clade, (Sciuromorpha, Hystricomorpha)   | -<br>1120828.1 | 2.7           | 0.420          | 0.398          |
| Scandentia                                            |                |               |                |                |
| Sister to Glires                                      | -<br>1120825.3 | Best          | 0.680          | 0.681          |
| Sister to Primatomorpha                               | -<br>1120829.2 | 3.9           | 0.320          | 0.319          |

Abbreviations: ln L, log-likelihood;  $\Delta$  ln L, the difference between best topology and other topology; SH probability, Shimodaira-Hasegawa probability; AU probability, approximately unbiased probability.

**Supplementary Table S7. Likelihood ratio test of alternative topologies for dataset B protein sequences as implemented in CONSEN package.**

| Tree topology                                         | ln L          | $\Delta$ ln L | SH probability | AU probability   |
|-------------------------------------------------------|---------------|---------------|----------------|------------------|
| Laurastheria                                          |               |               |                |                  |
| (Ferae, (Chiroptera, (Perissodactyle, Artiodactyla))) | -<br>413317.4 | Best          | 0.974          | 0.948            |
| (Chiroptera, ((Perissodactyle, Artiodactyla), Ferae)) | -<br>413326.9 | 9.5           | 0.522          | 0.106            |
| ((Chiroptera, Perissodactyle), (Artiodactyla, Ferae)) | -<br>413339.0 | 21.6          | 0.230          | 0.113            |
| (Chroptera, (Perissodactyle, (Artiodactyla, Ferae)))  | -<br>413343.6 | 26.2          | 0.162          | 0.133            |
| (Chroptera, (Artiodactyla, (Perissodactyle, Ferae)))  | -<br>413366.9 | 49.5          | <b>0.006</b>   | <b>&lt;0.001</b> |
| Paenungulata                                          |               |               |                |                  |
| (Proboscidea, (Sirenia, Hyracoidea))                  | -<br>413296.2 | Best          | 0.835          | 0.753            |
| (Sirenia, (Proboscidea, Hyracoidea))                  | -<br>413306.9 | 10.7          | 0.393          | 0.287            |
| (Hyracoidea, (Proboscidea, Sirenia))                  | -<br>413326.9 | 30.7          | <b>0.046</b>   | <b>0.021</b>     |
| Placencia root                                        |               |               |                |                  |
| Xenarthria                                            | -<br>413309.5 | Best          | 0.690          | 0.565            |
| Afrotheria                                            | -<br>413311.0 | 1.5           | 0.603          | 0.477            |
| Atlantogenata                                         | -<br>413326.9 | 17.4          | 0.086          | <b>0.020</b>     |
| Rodentia                                              |               |               |                |                  |
| (Sciuromorpha, (Mouse-related clade, Hystricomorpha)) | -<br>413326.9 | Best          | 0.763          | 0.738            |
| (Mouse-related clade, (Sciuromorpha, Hystricomorpha)) | -<br>413337.8 | 10.9          | 0.237          | 0.262            |
| Scandentia                                            |               |               |                |                  |
| Sister to Glires                                      | -<br>413326.9 | Best          | 0.809          | 0.825            |
| Sister to Primatomorpha                               | -<br>413335.4 | 8.5           | 0.191          | 0.175            |

Abbreviations: ln L, log-likelihood;  $\Delta$  ln L, the difference between best topology and other topology; SH probability, Shimodaira-Hasegawa probability; AU probability, approximately unbiased probability.

**Supplementary Table S8. Guanine-cytosine (GC) along with the third position of codon (GC3) content of two datasets.**

| <b>Dataset A</b> | <b>GC</b> | <b>GC3</b> |                  |           |            |                  |           |            |
|------------------|-----------|------------|------------------|-----------|------------|------------------|-----------|------------|
| A2AB             | 0.6005    | 0.8393     | 014_comb         | 0.4419    | 0.5364     | 058_comb         | 0.5409    | 0.5392     |
| ADORA3           | 0.4569    | 0.6664     | 015_comb         | 0.4454    | 0.4221     | 059_comb         | 0.4541    | 0.4197     |
| ADRB2            | 0.5325    | 0.7666     | <b>Dataset B</b> | <b>GC</b> | <b>GC3</b> | 060_comb         | 0.4879    | 0.6157     |
| ApoB             | 0.4315    | 0.4610     | 016_comb         | 0.4475    | 0.4880     | 061_comb         | 0.4611    | 0.3475     |
| APP              | 0.3691    | None       | 017_comb         | 0.3919    | 0.2313     | <b>Dataset B</b> | <b>GC</b> | <b>GC3</b> |
| ATP7A            | 0.4063    | 0.3453     | 018_comb         | 0.4295    | 0.3975     | 062_comb         | 0.5448    | 0.7562     |
| BCHE             | 0.4134    | 0.3506     | 019_comb         | 0.5035    | 0.5634     | 063_comb         | 0.5478    | 0.7229     |
| BDNF             | 0.5558    | 0.6688     | 020_comb         | 0.4164    | 0.4259     | 064_comb         | 0.5608    | 0.6771     |
| BMI1             | 0.3259    | None       | 021_comb         | 0.5378    | 0.6734     | 065_comb         | 0.4205    | 0.4961     |
| BRCA1            | 0.4180    | 0.3435     | 022_comb         | 0.6303    | 0.8764     | 066_comb         | 0.3715    | 0.2407     |
| BRCA2            | 0.3488    | 0.2666     | 023_comb         | 0.5581    | 0.6454     | 067_comb         | 0.4993    | 0.5357     |
| CNR1             | 0.5304    | 0.7352     | 025_comb         | 0.3907    | 0.3433     | 068_comb         | 0.4200    | 0.4622     |
| CREM             | 0.4333    | None       | 027_comb         | 0.3514    | 0.3303     | 069_comb         | 0.4514    | 0.4466     |
| DMP1             | 0.5136    | 0.5250     | 028_comb         | 0.4066    | 0.3498     | 070_comb         | 0.5213    | 0.5479     |
| EDG1             | 0.5624    | 0.8367     | 029_comb         | 0.4472    | 0.5570     | 071_comb         | 0.5799    | 0.8603     |
| ENAM             | 0.4470    | 0.3444     | 030_comb         | 0.5737    | 0.5662     | 072_comb         | 0.6199    | 0.8567     |
| FBN1             | 0.3425    | None       | 031_comb         | 0.5905    | 0.8931     | 073_comb         | 0.5756    | 0.6338     |
| GHR              | 0.4886    | 0.4779     | 033_comb         | 0.4212    | 0.4365     | 074_comb         | 0.5848    | 0.7557     |
| IRBP             | 0.6099    | 0.7530     | 034_comb         | 0.4896    | 0.3402     | 075_comb         | 0.5019    | 0.5387     |
| PLCB4            | 0.4013    | None       | 036_comb         | 0.6333    | 0.8130     | 076_comb         | 0.5268    | 0.7368     |
| PNOC             | 0.6150    | 0.7479     | 037_comb         | 0.5145    | 0.6142     | 077_comb         | 0.5055    | 0.5739     |
| RAG1             | 0.5192    | 0.6270     | 038_comb         | 0.4224    | 0.4587     | 078_comb         | 0.5471    | 0.6794     |
| RAG2             | 0.4391    | 0.4105     | 039_comb         | 0.4061    | 0.3468     | 079_comb         | 0.4292    | 0.4432     |
| TTN              | 0.4175    | 0.3156     | 040_comb         | 0.4177    | 0.3308     | 080_comb         | 0.5544    | 0.7640     |
| TYR1             | 0.4746    | 0.5678     | 041_comb         | 0.5418    | 0.6467     | 082_comb         | 0.4432    | 0.4759     |
| vWF              | 0.5928    | 0.7890     | 042_comb         | 0.4768    | 0.4351     | 084_comb         | 0.4148    | 0.3861     |
| <b>Dataset B</b> | <b>GC</b> | <b>GC3</b> | 043_comb         | 0.5217    | 0.6665     | 085_comb         | 0.5590    | 0.6301     |
| 000_comb         | 0.4931    | 0.3702     | 044_comb         | 0.5045    | 0.4279     | 086_comb         | 0.4919    | 0.6069     |
| 001_comb         | 0.4128    | 0.4109     | 045_comb         | 0.5056    | 0.5874     | 087_comb         | 0.3504    | 0.2900     |
| 002_comb         | 0.6337    | 0.8548     | 046_comb         | 0.4854    | 0.5952     | 089_comb         | 0.5390    | 0.7256     |
| 003_comb         | 0.4792    | 0.4463     | 047_comb         | 0.4792    | 0.5621     | 090_comb         | 0.4343    | 0.2972     |
| 004_comb         | 0.4735    | 0.4631     | 048_comb         | 0.5171    | 0.6304     | 091_comb         | 0.4901    | 0.5122     |
| 005_comb         | 0.4604    | 0.5287     | 049_comb         | 0.5744    | 0.6951     | 092_comb         | 0.4177    | 0.3546     |
| 006_comb         | 0.5860    | 0.9082     | 050_comb         | 0.4497    | 0.5605     | 093_comb         | 0.5911    | 0.8014     |
| 007_comb         | 0.5861    | 0.6485     | 051_comb         | 0.5272    | 0.5658     | 094_comb         | 0.4950    | 0.4067     |
| 009_comb         | 0.4273    | 0.3854     | 052_comb         | 0.4583    | 0.5487     | 095_comb         | 0.4465    | 0.3198     |
| 010_comb         | 0.4955    | 0.5893     | 053_comb         | 0.5249    | 0.6360     | 096_comb         | 0.4781    | 0.6368     |
| 011_comb         | 0.4076    | 0.3877     | 054_comb         | 0.4963    | 0.6716     | 097_comb         | 0.4645    | 0.5763     |
| 012_comb         | 0.4276    | 0.3033     | 055_comb         | 0.5111    | 0.6163     | 098_comb         | 0.4488    | 0.3124     |
| 013_comb         | 0.4251    | 0.4938     | 056_comb         | 0.5756    | 0.7108     | 099_comb         | 0.4831    | 0.5193     |
|                  |           |            | 057_comb         | 0.4699    | 0.4320     | 100_comb         | 0.4601    | 0.5153     |

|          |        |        |
|----------|--------|--------|
| 101_comb | 0.4527 | 0.4038 |
| 102_comb | 0.4708 | 0.5108 |
| 103_comb | 0.4582 | 0.4770 |
| 104_comb | 0.3819 | 0.3596 |
| 105_comb | 0.4059 | 0.3703 |

---

**Supplementary Table S9. The Robinson-Foulds (RF) distance between the tree without GC-rich genes and the trees under multiple partition strategies.**

| Dataset A - DNA | ①concatenation | ②gene   | ③coding+ noncoding | ④codon1/2+ codon3+ noncoding | ⑤gene+codon1/2 + codon3 + noncoding | ⑥Partition-Finder2 |
|-----------------|----------------|---------|--------------------|------------------------------|-------------------------------------|--------------------|
| GC-rich         | 0.0061         | 0.0061  | 0.0061             | 0.0183                       | 0.0183                              | 0.0000             |
| 0               |                | 0.0000  | 0.0000             | 0.0183                       | 0.0183                              | 0.0061             |
| ②               |                |         | 0.0000             | 0.0183                       | 0.0183                              | 0.0061             |
| ③               |                |         |                    | 0.0183                       | 0.0183                              | 0.0061             |
| ④               |                |         |                    |                              | 0.0000                              | 0.0183             |
| ⑤               |                |         |                    |                              |                                     | 0.0183             |
| Dataset B - DNA | ①concatenation | ②gene   | ③codon1/2 + codon3 | ④gene+ codon1/2 + codon3     | ⑤PartitionFinder2                   |                    |
| GC-rich         | 0.0342         | 0.00855 | 0.0513             | 0.0256                       | 0.0256                              |                    |
| ①               | 0.0000         | 0.0256  | 0.0427             | 0.0256                       | 0.0427                              |                    |
| ②               |                | 0.000   | 0.0427             | 0.0171                       | 0.0171                              |                    |
| ③               |                |         | 0.0000             | 0.0513                       | 0.0598                              |                    |
| ④               |                |         |                    | 0.0000                       | 0.0171                              |                    |



**Supplementary Table S10. Calibrations used in molecular dating analyses.**

| Number | Clade                            | MinAge | MaxAge | References            |
|--------|----------------------------------|--------|--------|-----------------------|
| 1      | Caenolestidae                    | 0      | 15.97  | Meredith et al., 2011 |
| 2      | Peramelidae                      | 4.36   | 23.8   | Meredith et al., 2011 |
| 3      | Peramelemorphia                  | 4.36   | 54.65  | Meredith et al., 2011 |
| 4      | Phalangeridae+Burramyidae        | 25     | 54.65  | Meredith et al., 2011 |
| 5      | Petauridae+Pseudocheiridae       | 25.5   | 54.65  | Meredith et al., 2011 |
| 6      | Macropodoidea+Potoroidae         | 24.7   | 54.65  | Meredith et al., 2011 |
| 7*     | Placentalia                      | 65.2   | 131.5  | Meredith et al., 2011 |
| 8*     | Vombatiformes                    | 25.5   | 54.65  | Springer et al., 2017 |
| 9*     | Australidelphia +Didelphimorphia | 65.18  | 83.8   | Springer et al., 2017 |
| 10     | Vermilingua                      | 15.97  | 61.1   | Meredith et al., 2011 |
| 11*    | Phyllophaga                      | 15.97  | 41.3   | Springer et al., 2017 |
| 12*    | Pilosa                           | 31.5   | 66     | Springer et al., 2017 |
| 13*    | Xenarthra                        | 47.8   | 66     | Springer et al., 2017 |
| 14     | Proboscidea                      | 6.8    | 23.03  | Meredith et al.,      |

|     |                                           |       |       |                                     |
|-----|-------------------------------------------|-------|-------|-------------------------------------|
| 15* | Hyracoidea                                | 6.08  | 11.62 | 2011<br>Springer<br>et al.,<br>2017 |
| 16  | Sirenia                                   | 31.4  | 40.6  | Meredith<br>et al.,<br>2011         |
| 17  | Macroscelidea                             | 15.97 | 56    | Meredith<br>et al.,<br>2011         |
| 18  | Chrysochloridae                           | 1.7   | 33.9  | Meredith<br>et al.,<br>2011         |
| 19* | Paenungulata                              | 55.6  | 71.2  | Springer<br>et al.,<br>2017         |
| 20  | Lagomorpha                                | 53.7  | 61.6  | Meredith<br>et al.,<br>2011         |
| 21  | Emballonuroidea                           | 47.8  | 59.2  | Meredith<br>et al.,<br>2011         |
| 22  | Hipposideridae+Rhinolophidae              | 38    | 56    | Meredith<br>et al.,<br>2011         |
| 23  | Craseonycteridae+Megadermatidae           | 33.9  | 47.8  | Meredith<br>et al.,<br>2011         |
| 24  | Molossidae+Vespertilionidae+Miniopteridae | 38    | 56    | Meredith<br>et al.,<br>2011         |
| 25  | Phyllostomidae+Mormoopidae                | 28.1  | 41.3  | Meredith<br>et al.,<br>2011         |
| 26  | Furipteridae+Noctilionidae                | 5.332 | 33.9  | Meredith<br>et al.,<br>2011         |
| 27* | Chiroptera                                | 47.8  | 66    | Springer<br>et al.,<br>2017         |
| 28* | Yangochiroptera                           | 47.8  | 61.6  | Springer<br>et al.,<br>2017         |
| 29* | Caniformia                                | 37.1  | 56    | Springer                            |

|     |                        |       |      |                             |
|-----|------------------------|-------|------|-----------------------------|
|     |                        |       |      | et al.,<br>2017             |
| 30  | Procyonidae+Mustelidae | 27.6  | 40.6 | Meredith<br>et al.,<br>2011 |
| 31* | Otariidae+Odobenidae   | 15.97 | 34   | Springer<br>et al.,<br>2017 |
| 32* | Pinnipedia             | 20.43 | 34   | Springer<br>et al.,<br>2017 |
| 33  | Felidae+Prionodontidae | 28.1  | 41.3 | Meredith<br>et al.,<br>2011 |
| 34* | Herpestidae+Eupleridae | 15.97 | 34   | Springer<br>et al.,<br>2017 |
| 35* | Ferae                  | 64    | 83.8 | Springer<br>et al.,<br>2017 |
| 36* | Carnivora              | 38    | 66   | Springer<br>et al.,<br>2017 |
| 37* | Lorisidae+Galagidae    | 38    | 56   | Springer<br>et al.,<br>2017 |
| 38* | Haplorrhini            | 38    | 59.2 | Springer<br>et al.,<br>2017 |
| 39* | Anthropoidea           | 28.3  | 56   | Meredith<br>et al.,<br>2011 |
| 40* | Primateomorpha         | 65.2  | 83.8 | Springer<br>et al.,<br>2017 |
| 41* | Primates               | 38    | 66   | Springer<br>et al.,<br>2017 |
| 42  | Catarrhini             | 20.55 | 37.3 | Meredith<br>et al.,<br>2011 |
| 43* | Strepsirrhini          | 38    | 56   | Springer<br>et al.,<br>2017 |

|     |                                |        |       |                       |
|-----|--------------------------------|--------|-------|-----------------------|
| 44* | Scandentia                     | 34     | 66    | Meredith et al., 2011 |
| 45* | Perissodactyla                 | 55.5   | 61.1  | Springer et al., 2017 |
| 46* | Erinaceidae+Soricidae          | 61.6   | 83.8  | Springer et al., 2017 |
| 47  | Erinaceidae                    | 28.1   | 47.8  | Meredith et al., 2011 |
| 48* | Artiodactyla                   | 52.5   | 65.8  | Springer et al., 2017 |
| 49* | Giraffidae+Antilocapridae      | 17.8   | 34    | Springer et al., 2017 |
| 50* | Balaenopteridae+Eschrichtiidae | 7.3    | 23.03 | Springer et al., 2017 |
| 51  | Bovidae+Moschidae              | 18     | 34    | Meredith et al., 2011 |
| 52* | Suidae+Tayassuidae             | 15.97  | 37.3  | Springer et al., 2017 |
| 53* | Whippomorpha                   | 52.5   | 61.1  | Springer et al., 2017 |
| 54* | Cetacea                        | 33.8   | 48.8  | Springer et al., 2017 |
| 55* | Mysticeti                      | 20.43  | 34    | Springer et al., 2017 |
| 56  | Physeteroidea                  | 11.608 | 28.5  | Meredith et al., 2011 |
| 57* | Phocoenidae+Monodontidae       | 12.1   | 28.5  | Springer et al., 2017 |
| 58* | Rodentia                       | 56     | 66    | Springer et al.,      |

|     |                                         |       |      |                                     |
|-----|-----------------------------------------|-------|------|-------------------------------------|
| 59  | Sciuridae+Aplodontiidae                 | 45.7  | 59.2 | 2017<br>Springer<br>et al.,<br>2017 |
| 60* | Sciuromorpha                            | 47.8  | 61.1 | Springer<br>et al.,<br>2017         |
| 61* | Octodontoidea+Ctenomyidae+Octodontidae  | 24.5  | 38   | Springer<br>et al.,<br>2017         |
| 62* | Ctenomyidae+Octodontidae                | 9.07  | 33.9 | Springer<br>et al.,<br>2017         |
| 63* | Chinchillidae+Dinomyidae                | 24.5  | 38   | Springer<br>et al.,<br>2017         |
| 64  | Hydrochoeridae+Caviidae                 | 11.8  | 34   | Meredith<br>et al.,<br>2011         |
| 65  | Caviidae+Dasyproctidae                  | 24.5  | 38   | Meredith<br>et al.,<br>2011         |
| 66* | Anomaluromorpha+Myomorpha               | 54    | 61.6 | Springer<br>et al.,<br>2017         |
| 67  | Anomaluromorpha                         | 37.1  | 56   | Meredith<br>et al.,<br>2011         |
| 68  | Geomyoidea                              | 31.4  | 41.3 | Meredith<br>et al.,<br>2011         |
| 69* | Castorimorpha+Heteromyidae              | 52.4  | 61.1 | Springer<br>et al.,<br>2017         |
| 70* | Myomorpha                               | 45    | 59.2 | Springer<br>et al.,<br>2017         |
| 71  | Ctenodactylidae                         | 28.3  | 47.8 | Meredith<br>et al.,<br>2011         |
| 72  | Anomaluromorpha+Castorimorpha+Myomorpha | 54    | 66   | Meredith<br>et al.,<br>2011         |
| 73* | Mammalia                                | 164.9 | 227  | Springer                            |

|    |                                |       |       |                                                |
|----|--------------------------------|-------|-------|------------------------------------------------|
| 74 | Amniota                        | 318   | 332.9 | et al.,<br>2017<br>Meredith<br>et al.,<br>2011 |
| 75 | Tetrapoda                      | 337   | 351   | Meredith<br>et al.,<br>2011                    |
| 76 | Sarcopterygii + Actinopterygii | 420.7 | 444.9 | Meredith<br>et al.,<br>2011                    |

---

Note: \*, the shared calibration fossil record between two datasets

**Supplementary Table S11. Bayesian selection of molecular clocks for dataset A and B amino acid alignments.**

| Data          | Clocks    | -logL           | S.E.         | BF              | Pr(M D)      |
|---------------|-----------|-----------------|--------------|-----------------|--------------|
| Dataset A AA  | CLK       | 5882.798        | 2.214        | 0.000           | 0.000        |
|               | IR        | 1195.989        | 2.220        | 4686.809        | 0.000        |
|               | <b>AR</b> | <b>1128.256</b> | <b>2.568</b> | <b>4754.542</b> | <b>1.000</b> |
| Dataset B DNA | CLK       | 10552.860       | 1.672        | 0.000           | 0.000        |
|               | IR        | 976.233         | 1.807        | 9576.627        | 0.000        |
|               | <b>AR</b> | <b>957.524</b>  | <b>2.118</b> | <b>9595.336</b> | <b>1.000</b> |
| Dataset B AA  | CLK       | 3012.954        | 1.707        | 0.000           | 0.000        |
|               | <b>IR</b> | <b>708.276</b>  | <b>1.886</b> | <b>2304.678</b> | <b>0.976</b> |
|               | AR        | 711.996         | 1.767        | 2300.958        | 0.024        |

Note: **BF**: Bayes factors, **CLK**: strict clock, **IR**: Independent-rates model under log-normal distribution, **AR**: Autocorrelated-rates model under geometric Brownian motion.

**Supplementary Table S12. The divergence time difference between this study and Meredith et al. (2011) from DNA alignments.**

| Order             | Class | Mean | Lower | Upper | Width | Class    | Mean | Lower | Upper | Width | $\Delta$ mean | $\Delta$ width |
|-------------------|-------|------|-------|-------|-------|----------|------|-------|-------|-------|---------------|----------------|
| Agreodontia       | 26DN  | 55.  | 49    | 61.   | 11    | 26DNA_   | 53.  | 51    | 55.   | 4.    | 3.60          | 7.09           |
|                   | A_new | 04   | .69   | 61.33 | .64   | meredith | 56   | .44   | 99    | 55    |               |                |
| Eomarsupialia     | 26DN  | 56.  | 51    | 62.   | 11    | 26DNA_   | 54.  | 51    | 56.   | 4.    | 2.59          | 6.9            |
|                   | A_new | 61   | .37   | 62.76 | .39   | meredith | 02   | .95   | 44    | 49    |               |                |
| Australidelphia   | 26DN  | 59.  | 54    | 66.   | 11    | 26DNA_   | 55.  | 53    | 58.   | 4.    | 6.23          | 7.33           |
|                   | A_new | 88   | .40   | 66.39 | .99   | meredith | 76   | .65   | 31    | 66    |               |                |
| Xenarthra         | 26DN  | 60.  | 51    | 66.   | 14    | 26DNA_   | 61.  | 58    | 66.   | 8.    | -1.24         | 6.62           |
|                   | A_new | 33   | .72   | 66.70 | .98   | meredith | 57   | .43   | 79    | 36    |               |                |
| Paenungulata      | 26DN  | 63.  | 55    | 70.   | 14    | 26DNA_   | 63.  | 59    | 68.   | 9.    | 4.38          | 4.93           |
|                   | A_new | 42   | .51   | 70.18 | .67   | meredith | 60   | .04   | 78    | 74    |               |                |
| Afroinsectivora   | 26DN  | 73.  | 61    | 79.   | 18    | 26DNA_   | 77.  | 72    | 93.   | 21    | -3.88         | -3.73          |
|                   | A_new | 25   | .51   | 79.63 | .12   | meredith | 13   | .09   | 94    | 5     |               |                |
| Afroinsectiphilia | 26DN  | 75.  | 64    | 81.   | 17    | 26DNA_   | 78.  | 73    | 95.   | 21    | 2.59          | -4.48          |
|                   | A_new | 78   | .37   | 81.88 | .51   | meredith | 29   | .19   | 18    | 9     |               |                |
| Ferae             | 26DN  | 76.  | 72    | 80.   | 7.    | 26DNA_   | 78.  | 73    | 81.   | 7.    | -2.62         | 0.13           |
|                   | A_new | 01   | .06   | 80.02 | .796  | meredith | 63   | .57   | 40    | 83    |               |                |
| Glires            | 26DN  | 76.  | 73    | 80.   | 6.    | 26DNA_   | 81.  | 79    | 83.   | 4.    | -2.14         | 2.61           |
|                   | A_new | 99   | .59   | 80.54 | .695  | meredith | 25   | .13   | 47    | 34    |               |                |
| Afrotheria        | 26DN  | 77.  | 66    | 83.   | 17    | 26DNA_   | 79.  | 74    | 96.   | 22    | -1.67         | -4.79          |
|                   | A_new | 80   | .45   | 83.76 | .31   | meredith | 47   | .41   | 51    | 0     |               |                |
| Primateomorpha    | 26DN  | 79.  | 75    | 83.   | 7.    | 26DNA_   | 83.  | 81    | 85.   | 4.    | -1.75         | 3.38           |
|                   | A_new | 40   | .65   | 83.63 | .798  | meredith | 37   | .15   | 75    | 60    |               |                |
| Variamina         | 26DN  | 80.  | 76    | 83.   | 6.    | 26DNA_   | 81.  | 76    | 83.   | 7.    | -1.09         | -0.43          |
|                   | A_new | 39   | .93   | 83.84 | .691  | meredith | 48   | .56   | 90    | 34    |               |                |



|                          |                  |           |                |           |                |                        |           |                |           |           |       |       |
|--------------------------|------------------|-----------|----------------|-----------|----------------|------------------------|-----------|----------------|-----------|-----------|-------|-------|
| Marsupialia              | 26DN<br>A_n<br>w | 80.<br>44 | 72.<br>.7<br>5 | 84.<br>81 | 12.<br>.0<br>6 | 26DNA_<br>meredit<br>h | 71.<br>68 | 67.<br>.9<br>3 | 75.<br>33 | 7.<br>40  | 12.51 | 4.66  |
| Euarcho<br>ntoglire<br>s | 26DN<br>A_n<br>w | 81.<br>30 | 77.<br>.7<br>8 | 85.<br>05 | 7.<br>27       | 26DNA_<br>meredit<br>h | 83.<br>89 | 81.<br>.8<br>2 | 86.<br>16 | 4.<br>34  | -2.59 | 2.93  |
| Laurasia<br>theria       | 26DN<br>A_n<br>w | 84.<br>09 | 80.<br>.0<br>1 | 88.<br>50 | 8.<br>49       | 26DNA_<br>meredit<br>h | 84.<br>05 | 80.<br>.1<br>4 | 86.<br>39 | 6.<br>25  | 3.95  | 2.24  |
| Boreoeu<br>theria        | 26DN<br>A_n<br>w | 91.<br>84 | 86.<br>.9<br>2 | 97.<br>03 | 10.<br>.1<br>1 | 26DNA_<br>meredit<br>h | 91.<br>67 | 89.<br>.2<br>3 | 94.<br>67 | 5.<br>44  | 0.17  | 4.67  |
| Placenta<br>lia          | 26DN<br>A_n<br>w | 10<br>1.3 | 94<br>.5       | 10<br>8.2 | 13<br>.6       | 26DNA_<br>meredit<br>h | 10<br>0.9 | 97<br>.2       | 11<br>4.6 | 17<br>.4  | 4.17  | -3.83 |
| Eulipoty<br>phla         | 26DN<br>A_n<br>w | 78.<br>10 | 73.<br>.2<br>9 | 82.<br>91 | 9.<br>62       | 26DNA_<br>meredit<br>h | 76.<br>89 | 72.<br>.4<br>8 | 79.<br>91 | 7.<br>43  | 1.21  | 2.19  |
| Rodenti<br>a             | 26DN<br>A_n<br>w | 67.<br>02 | 65.<br>.6<br>3 | 68.<br>84 | 3.<br>21       | 26DNA_<br>meredit<br>h | 72.<br>95 | 71.<br>.1<br>5 | 74.<br>80 | 3.<br>65  | -4.13 | -0.44 |
| Afrosori<br>cida         | 26DN<br>A_n<br>w | 64.<br>88 | 54.<br>.1<br>4 | 73.<br>37 | 19.<br>.2<br>3 | 26DNA_<br>meredit<br>h | 70.<br>75 | 65.<br>.3<br>6 | 87.<br>96 | 22.<br>.6 | -5.87 | -3.37 |
| Artiodac<br>tyla         | 26DN<br>A_n<br>w | 64.<br>85 | 62.<br>.5<br>0 | 66.<br>57 | 4.<br>07       | 26DNA_<br>meredit<br>h | 64.<br>90 | 62.<br>.3<br>4 | 66.<br>34 | 4.<br>00  | 2.51  | 0.07  |
| Primates                 | 26DN<br>A_n<br>w | 64.<br>70 | 64.<br>.3<br>5 | 67.<br>43 | 3.<br>08       | 26DNA_<br>meredit<br>h | 71.<br>90 | 67.<br>.0<br>4 | 75.<br>35 | 8.<br>31  | -7.20 | -5.23 |
| Chiropte<br>ra           | 26DN<br>A_n<br>w | 64.<br>69 | 61.<br>.4<br>9 | 66.<br>95 | 5.<br>46       | 26DNA_<br>meredit<br>h | 65.<br>81 | 62.<br>.7<br>4 | 68.<br>03 | 5.<br>29  | 1.95  | 0.17  |
| Perissod<br>actyla       | 26DN<br>A_n<br>w | 57.<br>62 | 55.<br>.3<br>3 | 60.<br>85 | 5.<br>52       | 26DNA_<br>meredit<br>h | 55.<br>87 | 55.<br>.0<br>8 | 57.<br>37 | 2.<br>29  | 1.75  | 3.23  |
| Carnivor<br>a            | 26DN<br>A_n<br>w | 56.<br>28 | 50.<br>.7<br>3 | 62.<br>25 | 11.<br>.5<br>2 | 26DNA_<br>meredit<br>h | 50.<br>37 | 47.<br>.3<br>5 | 53.<br>41 | 6.<br>06  | 8.93  | 5.46  |
| Lagomo<br>rpha           | 26DN<br>A_n<br>w | 55.<br>69 | 53.<br>.2<br>1 | 59.<br>80 | 6.<br>59       | 26DNA_<br>meredit<br>h | 51.<br>52 | 48.<br>.2<br>1 | 54.<br>45 | 6.<br>24  | 4.17  | 0.35  |

|                          |                   |           |               |           |               |                        |           |               |           |               |                               |                                    |
|--------------------------|-------------------|-----------|---------------|-----------|---------------|------------------------|-----------|---------------|-----------|---------------|-------------------------------|------------------------------------|
| Pilosa                   | 26DN<br>A_ne<br>w | 52.<br>56 | 43<br>.3<br>2 | 60.<br>59 | 17<br>.2<br>7 | 26DNA_<br>meredit<br>h | 53.<br>9  | 50<br>.2<br>8 | 59.<br>00 | 8.<br>72      | 2.28                          | 8.55                               |
| Scanden<br>tia           | 26DN<br>A_ne<br>w | 52.<br>40 | 40<br>.2<br>0 | 64.<br>10 | 23<br>.9<br>0 | 26DNA_<br>meredit<br>h | 56.<br>25 | 51<br>.0<br>0 | 62.<br>33 | 11<br>.3<br>3 | -3.85                         | 12.57                              |
| Macrosc<br>elidea        | 26DN<br>A_ne<br>w | 48.<br>38 | 39<br>.2<br>3 | 56.<br>63 | 17<br>.4<br>0 | 26DNA_<br>meredit<br>h | 52.<br>32 | 46<br>.2<br>9 | 56.<br>99 | 10<br>.7<br>0 | 2.09                          | 6.70                               |
| Diprot<br>ontia          | 26DN<br>A_ne<br>w | 48.<br>22 | 43<br>.5<br>6 | 53.<br>32 | 9.<br>76      | 26DNA_<br>meredit<br>h | 45.<br>13 | 42<br>.4<br>2 | 47.<br>85 | 5.<br>43      | 3.09                          | 4.33                               |
| Didelphi<br>morphia      | 26DN<br>A_ne<br>w | 38.<br>78 | 29<br>.8<br>4 | 47.<br>71 | 17<br>.8<br>7 | 26DNA_<br>meredit<br>h | 29.<br>17 | 25<br>.6<br>5 | 32.<br>37 | 6.<br>72      | 13.13                         | 11.15                              |
| Sirenia                  | 26DN<br>A_ne<br>w | 32.<br>40 | 30<br>.5<br>8 | 35.<br>21 | 4.<br>63      | 26DNA_<br>meredit<br>h | 29.<br>28 | 24<br>.9<br>6 | 31.<br>57 | 6.<br>61      | 3.12                          | -1.98                              |
| Pholidot<br>a            | 26DN<br>A_ne<br>w | 27.<br>87 | 17<br>.1<br>0 | 39.<br>42 | 22<br>.3<br>2 | 26DNA_<br>meredit<br>h | 20.<br>15 | 16<br>.9<br>1 | 24.<br>96 | 8.<br>05      | 10.96                         | 14.27                              |
| Dasyuro<br>morphia       | 26DN<br>A_ne<br>w | 27.<br>01 | 18<br>.6<br>1 | 34.<br>18 | 15<br>.5<br>7 | 26DNA_<br>meredit<br>h | 25.<br>66 | 22<br>.1<br>5 | 29.<br>64 | 7.<br>49      | 1.35                          | 8.08                               |
| Peramel<br>omorphi<br>a  | 26DN<br>A_ne<br>w | 26.<br>47 | 19<br>.1<br>8 | 34.<br>06 | 14<br>.8<br>8 | 26DNA_<br>meredit<br>h | 24.<br>26 | 21<br>.0<br>5 | 27.<br>69 | 6.<br>64      | 5.42                          | 8.24                               |
| Paucitu<br>berculat<br>a | 26DN<br>A_ne<br>w | 11.<br>81 | 7.<br>70      | 16.<br>00 | 8.<br>30      | 26DNA_<br>meredit<br>h | 10.<br>28 | 7.<br>96      | 12.<br>94 | 4.<br>98      | 1.53                          | 3.32                               |
| Dermop<br>tera           | 26DN<br>A_ne<br>w | 11.<br>10 | 6.<br>08      | 16.<br>08 | 10<br>.0<br>0 | 26DNA_<br>meredit<br>h | 7.3<br>2  | 5.<br>91      | 8.9<br>6  | 3.<br>05      | 3.78                          | 6.22                               |
| Hyracoi<br>dea           | 26DN<br>A_ne<br>w | 7.1<br>3  | 5.<br>72      | 9.3<br>3  | 3.<br>61      | 26DNA_<br>meredit<br>h | 4.9<br>1  | 3.<br>87      | 6.0<br>7  | 2.<br>20      | 2.22                          | 1.41                               |
| Probosci<br>dea          | 26DN<br>A_ne<br>w | 6.0<br>4  | 4.<br>04      | 7.7<br>3  | 3.<br>69      | 26DNA_<br>meredit<br>h | 2.4<br>4  | 1.<br>79      | 3.2<br>1  | 1.<br>42      | 4.25                          | 2.27                               |
| Sum                      |                   |           |               |           |               |                        |           |               |           |               | 75.90<br>(p=4.<br>56e-<br>02) | 123.7<br>9<br>(p=3.<br>43e-<br>04) |

Note:  $\Delta$ mean represents the difference mean values of in this study and Meredith et al. (2011);  $\Delta$ width represents the difference width values of in this study and Meredith et al. (2011). P values was calculated by paired Wilcoxon signed rank test.

**Supplementary Table S13. The divergence time difference between this study and Meredith et al. (2011) from protein sequences.**

| Order             | Class     | Mean  | Lower | Upper | Width | Class         | Mean  | Lower | Upper | Width | $\Delta$ mean | $\Delta$ width |
|-------------------|-----------|-------|-------|-------|-------|---------------|-------|-------|-------|-------|---------------|----------------|
| Agreodontia       | 21A_A_new | 59.84 | 54.7  | 65.11 | 10.41 | 21AA_meredith | 65.10 | 60.01 | 70.22 | 10.21 | -5.26         | -0.20          |
| Eomarsupialia     | 21A_A_new | 61.83 | 56.43 | 66.67 | 10.24 | 21AA_meredith | 66.38 | 61.41 | 71.58 | 10.17 | -4.55         | -0.07          |
| Australidelphia   | 21A_A_new | 64.89 | 59.83 | 69.83 | 10.00 | 21AA_meredith | 68.36 | 61.41 | 71.58 | 10.17 | -3.47         | 0.17           |
| Xenarthra         | 21A_A_new | 60.89 | 51.30 | 67.00 | 15.70 | 21AA_meredith | 68.42 | 63.11 | 71.50 | 8.39  | -7.53         | -7.31          |
| Paenungulata      | 21A_A_new | 63.65 | 56.48 | 70.56 | 14.08 | 21AA_meredith | 64.70 | 60.21 | 69.41 | 9.20  | -1.05         | -4.88          |
| Afroinsectivora   | 21A_A_new | 66.63 | 59.07 | 74.38 | 15.31 | 21AA_meredith | 76.75 | 71.44 | 80.90 | 9.46  | -10.12        | -5.85          |
| Afroinsectiphilia | 21A_A_new | 69.58 | 61.76 | 76.97 | 15.21 | 21AA_meredith | 77.98 | 72.89 | 81.90 | 9.01  | -8.40         | -6.20          |
| Ferae             | 21A_A_new | 73.42 | 70.41 | 76.59 | 6.18  | 21AA_meredith | 80.56 | 78.03 | 82.98 | 4.95  | -7.14         | -1.23          |
| Glires            | 21A_A_new | 72.00 | 69.61 | 75.54 | 5.93  | 21AA_meredith | 78.70 | 79.13 | 94.12 | 14.99 | -6.70         | 9.06           |
| Afrotheria        | 21A_A_new | 72.08 | 64.51 | 79.52 | 15.01 | 21AA_meredith | 81.77 | 77.31 | 85.30 | 7.99  | -9.69         | -7.02          |
| Primateomorpha    | 21A_A_new | 75.38 | 72.38 | 78.35 | 5.97  | 21AA_meredith | 81.74 | 79.33 | 84.14 | 4.81  | -6.36         | -1.16          |
| Variamina         | 21A_A_new | 76.70 | 73.56 | 80.04 | 6.48  | 21AA_meredith | 82.33 | 80.04 | 84.49 | 4.45  | -5.63         | -2.03          |
| Marsupialia       | 21A_A_new | 80.58 | 76.48 | 84.38 | 7.90  | 21AA_meredith | 87.87 | 81.57 | 96.45 | 14.88 | -7.29         | 6.98           |

|                      |                  |               |           |           |           |                       |                |           |                |           |       |       |
|----------------------|------------------|---------------|-----------|-----------|-----------|-----------------------|----------------|-----------|----------------|-----------|-------|-------|
| Euarcho<br>ntoglires | 21A<br>A_ne<br>w | 77<br>.8<br>8 | 74.<br>72 | 81.<br>08 | 6.3<br>6  | 21AA_<br>meredit<br>h | 83.<br>26      | 81.<br>02 | 85.<br>46      | 4.4<br>4  | -5.38 | -1.92 |
| Laurasiat<br>heria   | 21A<br>A_ne<br>w | 79<br>.1<br>2 | 75.<br>68 | 82.<br>94 | 7.2<br>6  | 21AA_<br>meredit<br>h | 84.<br>64      | 82.<br>14 | 87.<br>02      | 4.8<br>8  | -5.52 | -2.38 |
| Boreoeu<br>theria    | 21A<br>A_ne<br>w | 85<br>.8<br>1 | 80.<br>79 | 90.<br>99 | 10.<br>20 | 21AA_<br>meredit<br>h | 91.<br>34      | 88.<br>83 | 93.<br>85      | 5.0<br>2  | -5.53 | -5.18 |
| Placental<br>ia      | 21A<br>A_ne<br>w | 92<br>.2<br>2 | 85.<br>11 | 99.<br>78 | 14.<br>67 | 21AA_<br>meredit<br>h | 10<br>0.7<br>4 | 97.<br>37 | 10<br>4.1<br>1 | 6.7<br>4  | -8.52 | -7.93 |
| Eulipoty<br>phla     | 21A<br>A_ne<br>w | 71<br>.8<br>2 | 68.<br>31 | 75.<br>49 | 7.1<br>8  | 21AA_<br>meredit<br>h | 75.<br>71      | 72.<br>07 | 79.<br>13      | 7.0<br>6  | -3.89 | -0.12 |
| Rodentia             | 21A<br>A_ne<br>w | 65<br>.7<br>1 | 64.<br>21 | 66.<br>94 | 2.7<br>3  | 21AA_<br>meredit<br>h | 68.<br>60      | 67.<br>00 | 74.<br>80      | 7.8<br>0  | -2.89 | 5.07  |
| Afrosoric<br>ida     | 21A<br>A_ne<br>w | 58<br>.2<br>0 | 50.<br>07 | 66.<br>57 | 16.<br>5  | 21AA_<br>meredit<br>h | 64.<br>78      | 57.<br>83 | 69.<br>8       | 11.<br>97 | -6.58 | -4.53 |
| Artiodac<br>tyla     | 21A<br>A_ne<br>w | 64<br>.2<br>3 | 62.<br>06 | 66.<br>21 | 4.1<br>5  | 21AA_<br>meredit<br>h | 66.<br>11      | 64.<br>64 | 67.<br>98      | 3.3<br>4  | -1.88 | -0.81 |
| Primates             | 21A<br>A_ne<br>w | 66<br>.1<br>9 | 63.<br>89 | 68.<br>59 | 4.7<br>0  | 21AA_<br>meredit<br>h | 75.<br>77      | 73.<br>02 | 78.<br>43      | 5.4<br>1  | -9.58 | 0.71  |
| Chiropte<br>ra       | 21A<br>A_ne<br>w | 64<br>.9<br>8 | 62.<br>58 | 67.<br>12 | 4.5<br>4  | 21AA_<br>meredit<br>h | 66.<br>39      | 63.<br>34 | 69.<br>48      | 6.1<br>4  | -1.41 | 1.60  |
| Perissod<br>actyla   | 21A<br>A_ne<br>w | 58<br>.2<br>8 | 55.<br>58 | 61.<br>14 | 5.5<br>6  | 21AA_<br>meredit<br>h | 58.<br>03      | 55.<br>47 | 60.<br>98      | 5.5<br>1  | 0.25  | -0.05 |
| Carnivor<br>a        | 21A<br>A_ne<br>w | 58<br>.9<br>1 | 54.<br>41 | 63.<br>43 | 9.0<br>2  | 21AA_<br>meredit<br>h | 57.<br>12      | 53.<br>68 | 60.<br>64      | 6.9<br>6  | 1.79  | -2.06 |
| Lagomo<br>rpha       | 21A<br>A_ne<br>w | 54<br>.6<br>6 | 53.<br>08 | 56.<br>95 | 3.8<br>7  | 21AA_<br>meredit<br>h | 49.<br>07      | 47.<br>40 | 51.<br>77      | 4.3<br>7  | 5.59  | 0.50  |
| Pilosa               | 21A<br>A_ne<br>w | 50<br>.8<br>1 | 40.<br>78 | 58.<br>84 | 18.<br>06 | 21AA_<br>meredit<br>h | 57.<br>93      | 52.<br>8  | 62.<br>44      | 9.6<br>4  | -7.12 | -8.42 |

|                  |                  |               |           |           |           |                       |           |           |           |           |                                      |                                |
|------------------|------------------|---------------|-----------|-----------|-----------|-----------------------|-----------|-----------|-----------|-----------|--------------------------------------|--------------------------------|
| Scandentia       | 21A<br>A_ne<br>w | 49<br>.9<br>1 | 36.<br>87 | 60.<br>58 | 23.<br>71 | 21AA_<br>meredit<br>h | 57.<br>54 | 51.<br>00 | 63.<br>05 | 12.<br>05 | -7.63                                | 11.66                          |
| Macroscelidea    | 21A<br>A_ne<br>w | 42<br>.3<br>7 | 31.<br>84 | 54.<br>39 | 22.<br>55 | 21AA_<br>meredit<br>h | 45.<br>70 | 38.<br>44 | 53.<br>25 | 14.<br>81 | -3.33                                | -7.74                          |
| Diprotodontia    | 21A<br>A_ne<br>w | 54<br>.5<br>1 | 49.<br>24 | 59.<br>92 | 10.<br>68 | 21AA_<br>meredit<br>h | 56.<br>32 | 51.<br>52 | 61.<br>30 | 9.7<br>8  | -1.81                                | -0.90                          |
| Didelphimorphia  | 21A<br>A_ne<br>w | 37<br>.8<br>4 | 25.<br>75 | 49.<br>13 | 23.<br>38 | 21AA_<br>meredit<br>h | 31.<br>09 | 26.<br>04 | 36.<br>45 | 10.<br>41 | 6.75                                 | -12.97                         |
| Sirenia          | 21A<br>A_ne<br>w | 33<br>.8<br>2 | 30.<br>77 | 38.<br>26 | 7.4<br>9  | 21AA_<br>meredit<br>h | 31.<br>86 | 30.<br>52 | 34.<br>09 | 3.5<br>7  | 1.96                                 | -3.92                          |
| Pholidota        | 21A<br>A_ne<br>w | 29<br>.9<br>1 | 15.<br>67 | 42.<br>99 | 27.<br>32 | 21AA_<br>meredit<br>h | 27.<br>24 | 18.<br>98 | 35.<br>44 | 16.<br>46 | 2.67                                 | 10.86                          |
| Dasyuromorphia   | 21A<br>A_ne<br>w | 29<br>.5<br>2 | 18.<br>88 | 39.<br>35 | 20.<br>47 | 21AA_<br>meredit<br>h | 32.<br>02 | 25.<br>37 | 39.<br>6  | 14.<br>23 | -2.50                                | -6.24                          |
| Peramemorphia    | 21A<br>A_ne<br>w | 26<br>.6<br>2 | 16.<br>18 | 37.<br>76 | 21.<br>58 | 21AA_<br>meredit<br>h | 29.<br>35 | 24.<br>59 | 35.<br>06 | 10.<br>47 | -2.73                                | -11.11                         |
| Paucituberculata | 21A<br>A_ne<br>w | 13<br>.0<br>2 | 7.3<br>0  | 16.<br>84 | 9.5<br>4  | 21AA_<br>meredit<br>h | 13.<br>32 | 8.5<br>5  | 16.<br>18 | 7.6<br>3  | -0.30                                | -1.91                          |
| Dermoptera       | 21A<br>A_ne<br>w | 17<br>.1<br>4 | 6.5<br>0  | 26.<br>61 | 20.<br>11 | 21AA_<br>meredit<br>h | 7.3<br>8  | 5.9<br>1  | 10.<br>12 | 4.2<br>1  | 9.76                                 | 10.35                          |
| Hyracoidae       | 21A<br>A_ne<br>w | 7.<br>98      | 5.8<br>1  | 11.<br>08 | 5.2<br>7  | 21AA_<br>meredit<br>h | 6.0<br>9  | 4.6<br>2  | 7.7<br>5  | 3.1<br>3  | 1.89                                 | -2.14                          |
| Proboscidea      | 21A<br>A_ne<br>w | 9.<br>60      | 5.7<br>1  | 15.<br>81 | 10.<br>1  | 21AA_<br>meredit<br>h | 5.1<br>9  | 3.2<br>2  | 7.0<br>6  | 3.8<br>4  | 4.41                                 | -6.26                          |
| Sum              |                  |               |           |           |           |                       |           |           |           |           | -<br>124.72<br>(p =<br>2.84e-<br>04) | -65.58<br>(p=4.4<br>0e-<br>05) |

Note:  $\Delta$ mean represents the difference mean values of in this study and Meredith et al. (2011);  $\Delta$ width represents the difference width values of in this study and Meredith et al. (2011). P value is from paired Wilcoxon Signed Rank Test. P values was calculated by paired Wilcoxon

signed rank test.

**Supplementary Table S14. The comparison of the divergence time with different DNA datasets and fossil calibrations under the autocorrelated clock.**

| Order             | Old_data_new_c<br>alibration |                 | New_data_old_c<br>alibration |                 | Old_data_old_cal<br>ibration* |                  | New_data_new_c<br>alibration |                 |
|-------------------|------------------------------|-----------------|------------------------------|-----------------|-------------------------------|------------------|------------------------------|-----------------|
|                   | Mean                         | 95%<br>HPD      | Mean                         | 95% HPD         | Mean                          | 95%HPD           | Mea<br>n                     | 95%HPD          |
| Agreodontia       | 61.03                        | 55.27-<br>66.40 | 60.97                        | 56.14-<br>65.07 | 63.03                         | 61.71-<br>68.28  | 61.00                        | 55.99-<br>65.06 |
| Eomarsupialia     | 62.34                        | 56.61-<br>67.61 | 62.35                        | 57.68-<br>66.37 | 65.01                         | 62.35-<br>68.88  | 61.38                        | 57.55-<br>66.44 |
| Australidelphia   | 64.87                        | 55.34-<br>70.16 | 65.03                        | 60.51-<br>69.08 | 66.69                         | 63.88-<br>70.66  | 65.05                        | 60.42-<br>69.16 |
| Xenarthra         | 60.96                        | 51.15-<br>67.04 | 63.97                        | 59.49-<br>67.43 | 64.19                         | 60.18-<br>68.65  | 63.94                        | 59.39-<br>67.27 |
| Paenungulata      | 63.39                        | 56.21-<br>70.78 | 65.90                        | 61.65-<br>69.87 | 65.63                         | 62.77-<br>69.12  | 65.64                        | 61.16-<br>69.63 |
| Afroinsectivora   | 68.35                        | 60.35-<br>75.68 | 71.04                        | 66.28-<br>75.29 | 77.98                         | 74.83-<br>81.26  | 70.75                        | 65.55-<br>74.92 |
| Afroinsectiphilia | 70.33                        | 62.51-<br>77.79 | 73.03                        | 68.54-<br>77.28 | 79.10                         | 76.02-<br>82.33  | 72.78                        | 67.59-<br>76.95 |
| Ferae             | 73.91                        | 70.60-<br>77.23 | 74.91                        | 72.89-<br>77.04 | 79.49                         | 77.48-<br>81.50  | 74.96                        | 72.94-<br>77.31 |
| Glires            | 72.28                        | 69.56-<br>74.97 | 74.09                        | 72.32-<br>75.87 | 78.50                         | 76.69-<br>80.23  | 74.08                        | 72.25-<br>75.93 |
| Afrotheria        | 71.98                        | 64.10-<br>79.44 | 74.64                        | 70.20-<br>78.81 | 80.66                         | 77.70-<br>83.78  | 74.40                        | 69.26-<br>78.69 |
| Primateomorphia   | 75.24                        | 72.18-<br>78.45 | 77.11                        | 75.11-<br>79.14 | 81.69                         | 79.90-<br>83.45  | 77.09                        | 74.96-<br>79.14 |
| Variamana         | 76.60                        | 73.05-<br>80.16 | 77.87                        | 75.80-<br>80.08 | 81.71                         | 79.85-<br>83.62  | 77.94                        | 75.73-<br>80.22 |
| Marsupialia       | 79.13                        | 74.71-<br>84.03 | 80.76                        | 77.40-<br>84.11 | 82.21                         | 78.81-<br>86.72  | 80.78                        | 77.28-<br>84.27 |
| Euarchontoglires  | 76.59                        | 73.23-<br>79.91 | 78.49                        | 76.47-<br>80.61 | 81.91                         | 80.16-<br>83.64  | 92.81                        | 88.17-<br>97.36 |
| Laurasiatheria    | 78.53                        | 74.53-<br>82.29 | 79.94                        | 77.60-<br>82.19 | 83.81                         | 81.85-<br>85.81  | 80.00                        | 77.52-<br>82.45 |
| Boreoeutheria     | 85.22                        | 79.67-<br>90.56 | 86.91                        | 83.93-<br>89.89 | 90.05                         | 88.06-<br>92.11  | 86.93                        | 83.74-<br>90.25 |
| Placentalia       | 92.07                        | 84.35-<br>99.80 | 94.31                        | 90.17-<br>98.66 | 99.19                         | 96.55-<br>102.00 | 94.29                        | 89.75-<br>99.13 |
| Eulipotyphla      | 71.88                        | 68.14-<br>75.93 | 72.90                        | 70.44-<br>75.26 | 77.02                         | 74.58-<br>79.45  | 72.98                        | 70.39-<br>75.51 |

|                  |                                                                                          |                 |       |                 |       |                 |       |                 |
|------------------|------------------------------------------------------------------------------------------|-----------------|-------|-----------------|-------|-----------------|-------|-----------------|
| Rodentia         | 65.15                                                                                    | 63.33-<br>66.51 | 65.99 | 65.10-<br>66.85 | 68.20 | 66.70-<br>69.64 | 66.00 | 65.06-<br>66.91 |
| Afrosoricida     | 62.54                                                                                    | 54.70-<br>71.00 | 65.37 | 60.77-<br>69.78 | 71.05 | 67.11-<br>75.01 | 74.40 | 69.26-<br>78.69 |
| Artiodactyla     | 64.28                                                                                    | 62.10-<br>66.17 | 64.68 | 63.24-<br>66.04 | 66.67 | 65.31-<br>68.46 | 64.90 | 63.24-<br>66.07 |
| Primates         | 66.22                                                                                    | 63.82-<br>68.73 | 69.62 | 67.45-<br>71.60 | 75.47 | 73.42-<br>77.54 | 69.62 | 67.52-<br>71.76 |
| Chiroptera       | 71.88                                                                                    | 68.14-<br>75.93 | 72.90 | 70.44-<br>75.26 | 66.98 | 64.96-<br>68.91 | 65.13 | 63.29-<br>66.57 |
| Perissodactyla   | 58.37                                                                                    | 55.60-<br>61.12 | 58.45 | 55.69-<br>61.09 | 56.07 | 55.14-<br>57.81 | 58.38 | 55.47-<br>60.84 |
| Carnivora        | 59.43                                                                                    | 55.04-<br>63.70 | 58.32 | 55.40-<br>61.41 | 57.68 | 55.29-<br>60.02 | 58.35 | 55.29-<br>61.43 |
| Lagomorpha       | 54.89                                                                                    | 53.12-<br>57.47 | 54.03 | 52.91-<br>55.57 | 49.11 | 47.49-<br>51.78 | 54.05 | 52.88-<br>55.62 |
| Pilosa           | 52.38                                                                                    | 42.13-<br>59.93 | 55.60 | 50.72-<br>59.71 | 56.50 | 18.84-<br>32.41 | 55.55 | 50.53-<br>59.72 |
| Scandentia       | 49.98                                                                                    | 37.14-<br>60.57 | 54.00 | 47.78-<br>59.90 | 56.30 | 51.51-<br>60.77 | 53.91 | 47.29-<br>60.24 |
| Macroscelidea    | 44.34                                                                                    | 34.43-<br>56.01 | 48.25 | 41.14-<br>54.59 | 48.02 | 38.44-<br>53.25 | 47.89 | 40.50-<br>54.57 |
| Diprotodontia    | 55.50                                                                                    | 50.13-<br>61.09 | 54.93 | 50.37-<br>59.11 | 55.74 | 51.52-<br>61.30 | 54.92 | 50.45-<br>59.03 |
| Didelphimorphia  | 38.33                                                                                    | 24.64-<br>50.94 | 43.10 | 34.50-<br>50.45 | 34.96 | 26.04-<br>36.45 | 42.52 | 33.83-<br>52.94 |
| Sirenia          | 33.98                                                                                    | 30.84-<br>38.72 | 32.18 | 30.58-<br>34.43 | 31.35 | 30.52-<br>34.09 | 32.19 | 30.55-<br>34.57 |
| Pholidota        | 30.59                                                                                    | 15.31-<br>44.24 | 32.11 | 22.09-<br>40.25 | 25.47 | 19.15-<br>35.44 | 32.10 | 22.81-<br>41.15 |
| Dasyuromorphia   | 27.99                                                                                    | 17.32-<br>39.06 | 28.15 | 21.01-<br>34.61 | 29.72 | 22.15-<br>32.32 | 28.32 | 21.15-<br>34.78 |
| Peramelemorphia  | 28.32                                                                                    | 17.21-<br>39.74 | 25.71 | 19.95-<br>32.61 | 28.92 | 21.05-<br>30.36 | 25.63 | 19.33-<br>32.79 |
| Paucituberculata | 12.81                                                                                    | 7.00-<br>16.93  | 13.49 | 9.57-<br>16.67  | 12.49 | 7.96-<br>13.71  | 13.47 | 9.38-<br>16.57  |
| Dermoptera       | 18.39                                                                                    | 6.70-<br>28.65  | 15.69 | 10.37-<br>22.34 | 7.44  | 5.91-<br>10.12  | 15.48 | 10.36-<br>22.62 |
| Hyracoidea       | 8.02                                                                                     | 5.89-<br>11.22  | 6.87  | 5.66-<br>8.76   | 5.62  | 3.87-<br>6.94   | 6.86  | 5.65-8.71       |
| Proboscidea      | 10.26                                                                                    | 5.85-<br>16.99  | 7.45  | 5.46-<br>9.99   | 2.92  | 1.79-<br>7.21   | 7.45  | 5.40-9.96       |
| <i>P</i> value   | (Δmean-oldold/oldnew = 86.2; p=7.16e-03); (Δ95%HPD-oldold/oldnew = -233.46; p=3.64e-12); |                 |       |                 |       |                 |       |                 |



|  |                                                                                                                                                                                                                                                                                                                      |
|--|----------------------------------------------------------------------------------------------------------------------------------------------------------------------------------------------------------------------------------------------------------------------------------------------------------------------|
|  | ( $\Delta$ mean-newold/newnew = -12.81; p=0.283); ( $\Delta$ 95%HPD-newold/newnew = -16.1; p=6.141e-06);<br>( $\Delta$ mean-oldold/newold = 43.44; p=0.053); ( $\Delta$ 95%HPD-oldold/newold = -42.76; p=1.73e-03)<br>( $\Delta$ mean-oldnew/newnew = -55.57; p=5.70e-03);95%HPD-oldnew/newnew = 174.6; p=4.00e-10); |
|--|----------------------------------------------------------------------------------------------------------------------------------------------------------------------------------------------------------------------------------------------------------------------------------------------------------------------|

Old\_data\_new\_calibration was the Meredith et al.'s (2011) DNA dataset and new (in this study we updated) fossil calibrations; New\_data\_old\_calibration was the new DNA dataset generated in this study and Meredith et al.'s (2011) fossil calibrations; Old\_data\_old\_calibration was Meredith et al.'s (2011) DNA dataset and fossil calibrations and the mean value and 95% was from the Meredith et al. (2011) study; New\_data\_new\_calibration was new dataset and fossil calibration generated in this study.  $\Delta$ mean-oldold/oldnew and  $\Delta$ 95%HPD-oldold/oldnew was the comparison of the mean value and 95%HPD between Old\_data\_old\_calibration and Old\_data\_new\_calibration, respectively. The front part of the bracket was the different value and the latter part of the bracket was the p value calculated by paired Wilcoxon signed rank test. \*: the results from Meredith et al. (2011) study.

**Supplementary Table S15. The likelihood tests of rate-constant (RC) and rate-variable (RV) models of mammalian diversification from R packages.**

| Models           | LH              | AIC             | r1           | r2                                                            | r3           | Package |
|------------------|-----------------|-----------------|--------------|---------------------------------------------------------------|--------------|---------|
| <b>PB</b>        | <b>-114.036</b> | <b>230.071</b>  | <b>0.022</b> |                                                               |              | laser   |
| BD               | -111.036        | 232.071         | 0.022        |                                                               |              | laser   |
| DDX              | -106.394        | 216.788         | 0.066        |                                                               |              | laser   |
| DDL              | -95.800         | 192.598         | 0.033        |                                                               |              | laser   |
| yule2rate        | -78.601         | 163.202         | 0.028        | 0.001                                                         |              | laser   |
| <b>yule3rate</b> | <b>-69.722</b>  | <b>149.444</b>  | <b>0.036</b> | <b>0.014</b>                                                  | <b>0.002</b> | laser   |
| Models           | LH              | AICc            | Lamb_par     | Mu_par                                                        |              | Package |
| <b>PB</b>        | <b>-773.751</b> | <b>1549.528</b> | <b>0.022</b> | <b>0</b>                                                      |              | RPANDA  |
| BD               | -773.752        | 1551.578        | 0.022        | 1.310×10 <sup>-08</sup>                                       |              | RPANDA  |
| B-Exp            | -767.392        | 1538.86         | 0.017,0.007  | 0                                                             |              | RPANDA  |
| B-Exp_D          | -767.392        | 1540.936        | 0.017,0.007  | 7.209×10 <sup>-09</sup>                                       |              | RPANDA  |
| B_D-Exp          | -751.382        | 1508.916        | 0.039        | 8.136×10 <sup>02</sup> ,<br>7.431×10 <sup>02</sup>            | -            | RPANDA  |
| B-Exp_D-Exp      | -747.715        | 1503.684        | 0.012,0.020  | 1.460×10 <sup>-03</sup> ,<br>3.362×10 <sup>-02</sup>          |              | RPANDA  |
| B-Lin            | -752.352        | 1508.778        | 0.002,0.001  | 0                                                             |              | RPANDA  |
| B-Lin_D          | -752.352        | 1510.855        | 0.002,0.001  | 4.557×10 <sup>-09</sup>                                       |              | RPANDA  |
| <b>B_D-Lin</b>   | <b>-741.540</b> | <b>1489.232</b> | <b>0.059</b> | <b>1.398×10<sup>01</sup>,</b><br><b>4.122×10<sup>01</sup></b> |              | RPANDA  |
| B-Lin_D-Lin      | -752.352        | 1512.958        | 0.002,0.001  | -1.28×10 <sup>-02</sup> ,<br>7.500×10 <sup>-04</sup>          | -            | RPANDA  |

Abbreviations: LH, log-likelihood; AIC, Aaike Information Criterion; AICc, corrected Akaike

Information Criterion;  $r_1$ ,  $r_2$ ,  $r_3$ , net diversification rates, as applicable for models; Lamb\_par, speciation rate  $\lambda$  parameter; Mu\_par, extinction rate  $\mu$  parameter; PB, pure birth model with constant speciation rate; BD, birth-death model with constant speciation and extinction rate; DDX, fit exponential variants of the density-dependent speciation rate model; DDL, fit logistic variants of the density-dependent speciation rate model; yule2rate, pure birth (Yule) model assumes that the clade has diversified under net diversification rate  $r_1$  until some time point  $st$ , at which point the diversification rate shifts to a new rate  $r_2$ , yule3rate assumes diversification rate  $r_1$  until some time point  $st1$  shifts to a new rate  $r_2$ , then to another time point  $st2$  shifts to a new rate  $r_2$ ; B-Exp, pure birth with exponential variation of the speciation rate; D-Exp, birth-death model with exponential variation of the extinction rate; B-Lin, pure birth with linear variation of speciation rate; D-Lin, birth-death model with linear variation of the extinction rate.

**Supplementary Table S16. The zombie and ghost lineages implied from mammalian timetree.**

| Dataset            | Molecular clock | Calibration clade     | Fossil record from Minage to Maxage | 95% HPD of divergence time | Lineages types |
|--------------------|-----------------|-----------------------|-------------------------------------|----------------------------|----------------|
| Dataset A DNAs     | AR              | Octodontoidea         | (24.5, 38.0)                        | (19.6, 23.9)               | ghost          |
|                    |                 | Lorisidae + Galagidae | (38.0, 56.0)                        | (30.2, 37.3)               | ghost          |
|                    |                 | Primates              | (38.0, 66.0)                        | (67.5, 71.7)               | zombie         |
|                    |                 | Haplorrhini           | (38.0, 59.2)                        | (62.2, 67.5)               | zombie         |
| Dataset B DNAs     | IR              | Scandentia            | (34.0, 66.0)                        | (1.4, 12.2)                | ghost          |
|                    |                 | Anthropoidea          | (28.3, 56.0)                        | (6.4, 27.5)                | ghost          |
|                    |                 | Scandentia            | (34.0, 66.0)                        | (6.4, 27.5)                | ghost          |
| Dataset B proteins | IR              | Scandentia            | (34.0, 66.0)                        | (2.5, 16.3)                | ghost          |
|                    |                 | Anthropoidea          | (28.3, 56.0)                        | (6.9, 26.7)                | ghost          |
|                    |                 | Scandentia            | (34.0, 66.0)                        | (5.0, 28.6)                | ghost          |

Abbreviations: AR, autocorrelated rates model; IR, independent rates model; Minage, Minimum Age; MaxAge, Maximum Age; HPD, highest posterior density intervals.

**Supplementary Table S17. The divergence time difference between all and partial calibrations from DNA alignments under the independent clock.**

| Order             | Class       | Mean  | Lower | Upper | Width | Class               | Mean  | Lower | Upper | Width | $\Delta$ mean | $\Delta$ width |
|-------------------|-------------|-------|-------|-------|-------|---------------------|-------|-------|-------|-------|---------------|----------------|
| Agreodontia       | 26DNA_A_new | 55.04 | 49.69 | 61.33 | 11.64 | 26DNA_recalibration | 54.65 | 49.29 | 61.05 | 11.76 | 0.39          | -0.12          |
| Eomarsupialia     | 26DNA_A_new | 56.61 | 51.37 | 62.76 | 11.39 | 26DNA_recalibration | 56.19 | 50.87 | 62.44 | 11.57 | 0.42          | -0.18          |
| Australidelphia   | 26DNA_A_new | 59.88 | 54.40 | 66.39 | 11.99 | 26DNA_recalibration | 59.45 | 53.86 | 66.07 | 12.21 | 0.43          | -0.22          |
| Xenarthra         | 26DNA_A_new | 60.33 | 51.72 | 66.70 | 14.98 | 26DNA_recalibration | 60.58 | 51.97 | 66.83 | 14.86 | -0.25         | 0.12           |
| Paenungulata      | 26DNA_A_new | 63.42 | 55.51 | 70.18 | 14.67 | 26DNA_recalibration | 63.90 | 55.53 | 70.68 | 15.15 | -0.48         | -0.48          |
| Afroinsectivora   | 26DNA_A_new | 73.25 | 61.51 | 79.63 | 18.12 | 26DNA_recalibration | 73.52 | 62.16 | 80.15 | 17.99 | -0.27         | 0.13           |
| Afroinsectiphilia | 26DNA_A_new | 75.78 | 64.37 | 81.88 | 17.51 | 26DNA_recalibration | 76.07 | 65.25 | 82.50 | 17.25 | -0.29         | 0.26           |
| Ferae             | 26DNA_A_new | 76.01 | 72.06 | 80.02 | 7.96  | 26DNA_recalibration | 76.55 | 72.33 | 80.69 | 8.36  | -0.54         | -0.40          |
| Glires            | 26DNA_A_new | 76.99 | 73.59 | 80.54 | 6.95  | 26DNA_recalibration | 77.68 | 74.15 | 81.31 | 7.16  | -0.69         | -0.21          |
| Afrotheria        | 26DNA_A_new | 77.80 | 66.45 | 83.76 | 17.31 | 26DNA_recalibration | 78.10 | 67.08 | 84.31 | 17.23 | -0.30         | 0.08           |
| Primateomorpha    | 26DNA_A_new | 79.40 | 75.65 | 83.63 | 7.98  | 26DNA_recalibration | 80.44 | 76.63 | 84.19 | 7.56  | -1.04         | 0.42           |
| Variamina         | 26DNA_A_new | 80.39 | 76.93 | 83.84 | 6.91  | 26DNA_recalibration | 80.84 | 76.91 | 84.33 | 7.42  | -0.45         | -0.51          |
| Marsupialia       | 26DNA_A_new | 80.44 | 72.75 | 84.81 | 12.06 | 26DNA_recalibration | 79.72 | 71.41 | 84.62 | 13.21 | 0.72          | -1.15          |

|                      |                   |                |           |                |           |                             |                |           |                |           |       |            |
|----------------------|-------------------|----------------|-----------|----------------|-----------|-----------------------------|----------------|-----------|----------------|-----------|-------|------------|
| Euarcho<br>ntoglires | 26DN<br>A_ne<br>w | 81.<br>30      | 77.<br>78 | 85.<br>05      | 7.2<br>7  | 26DNA_re<br>calibratio<br>n | 82.<br>19      | 78.<br>44 | 85.<br>86      | 7.4<br>2  | -0.89 | -0.15      |
| Laurasia<br>theria   | 26DN<br>A_ne<br>w | 84.<br>09      | 80.<br>01 | 88.<br>50      | 8.4<br>9  | 26DNA_re<br>calibratio<br>n | 84.<br>46      | 80.<br>03 | 88.<br>83      | 8.8<br>0  | -0.37 | -0.31      |
| Boreoeu<br>theria    | 26DN<br>A_ne<br>w | 91.<br>84      | 86.<br>92 | 97.<br>03      | 10.<br>11 | 26DNA_re<br>calibratio<br>n | 92.<br>33      | 87.<br>39 | 97.<br>48      | 10.<br>09 | -0.49 | 0.02       |
| Placenta<br>lia      | 26DN<br>A_ne<br>w | 10<br>1.3<br>7 | 94.<br>58 | 10<br>8.2<br>1 | 13.<br>63 | 26DNA_re<br>calibratio<br>n | 10<br>1.6<br>8 | 94.<br>67 | 10<br>8.5<br>8 | 13.<br>91 | -0.31 | -0.28      |
| Eulipoty<br>phla     | 26DN<br>A_ne<br>w | 78.<br>10      | 73.<br>29 | 82.<br>91      | 9.6<br>2  | 26DNA_re<br>calibratio<br>n | 78.<br>21      | 72.<br>87 | 83.<br>09      | 10.<br>22 | -0.11 | -0.60      |
| Rodenti<br>a         | 26DN<br>A_ne<br>w | 67.<br>02      | 65.<br>63 | 68.<br>84      | 3.2<br>1  | 26DNA_re<br>calibratio<br>n | 67.<br>28      | 65.<br>76 | 69.<br>22      | 3.4<br>6  | -0.26 | -0.25      |
| Afrosori<br>cida     | 26DN<br>A_ne<br>w | 64.<br>88      | 54.<br>14 | 73.<br>37      | 19.<br>23 | 26DNA_re<br>calibratio<br>n | 65.<br>46      | 54.<br>51 | 73.<br>61      | 19.<br>10 | -0.58 | 0.13       |
| Artiodac<br>tyla     | 26DN<br>A_ne<br>w | 64.<br>85      | 62.<br>50 | 66.<br>57      | 4.0<br>7  | 26DNA_re<br>calibratio<br>n | 64.<br>95      | 62.<br>76 | 66.<br>64      | 3.8<br>8  | -0.10 | 0.19       |
| Primates             | 26DN<br>A_ne<br>w | 64.<br>70      | 64.<br>35 | 67.<br>43      | 3.0<br>8  | 26DNA_re<br>calibratio<br>n | 69.<br>74      | 63.<br>09 | 78.<br>18      | 15.<br>09 | -5.04 | -<br>12.01 |
| Chiropte<br>ra       | 26DN<br>A_ne<br>w | 64.<br>69      | 61.<br>49 | 66.<br>95      | 5.4<br>6  | 26DNA_re<br>calibratio<br>n | 64.<br>83      | 61.<br>81 | 67.<br>06      | 5.2<br>5  | -0.14 | 0.21       |
| Perissod<br>actyla   | 26DN<br>A_ne<br>w | 57.<br>62      | 55.<br>33 | 60.<br>85      | 5.5<br>2  | 26DNA_re<br>calibratio<br>n | 57.<br>57      | 55.<br>33 | 60.<br>81      | 5.4<br>8  | 0.05  | 0.04       |
| Carnivor<br>a        | 26DN<br>A_ne<br>w | 56.<br>28      | 50.<br>73 | 62.<br>25      | 11.<br>52 | 26DNA_re<br>calibratio<br>n | 56.<br>64      | 51.<br>45 | 62.<br>21      | 10.<br>76 | -0.36 | 0.76       |
| Lagomo<br>rpha       | 26DN<br>A_ne<br>w | 55.<br>69      | 53.<br>21 | 59.<br>80      | 6.5<br>9  | 26DNA_re<br>calibratio<br>n | 55.<br>74      | 53.<br>20 | 59.<br>92      | 6.7<br>2  | -0.05 | -0.13      |
| Pilosa               | 26DN<br>A_ne<br>w | 52.<br>56      | 43.<br>32 | 60.<br>59      | 17.<br>27 | 26DNA_re<br>calibratio<br>n | 52.<br>76      | 43.<br>39 | 60.<br>82      | 17.<br>43 | -0.20 | -0.16      |

|                  |               |       |       |       |       |                         |       |       |       |       |                                |                                    |
|------------------|---------------|-------|-------|-------|-------|-------------------------|-------|-------|-------|-------|--------------------------------|------------------------------------|
| Scandentia       | 26DN<br>A_new | 52.04 | 40.20 | 64.10 | 23.9  | 26DNA_re<br>calibration | 52.99 | 40.53 | 63.88 | 23.35 | -0.95                          | 0.55                               |
| Macroscelidea    | 26DN<br>A_new | 48.38 | 39.23 | 56.63 | 17.4  | 26DNA_re<br>calibration | 48.43 | 39.38 | 56.76 | 17.38 | -0.05                          | 0.02                               |
| Diprotodontia    | 26DN<br>A_new | 48.22 | 43.56 | 53.32 | 9.76  | 26DNA_re<br>calibration | 47.85 | 43.19 | 52.95 | 9.76  | 0.37                           | 0                                  |
| Didelphimorphia  | 26DN<br>A_new | 38.78 | 29.84 | 47.71 | 17.87 | 26DNA_re<br>calibration | 37.48 | 29.11 | 47.74 | 18.63 | 1.30                           | -0.76                              |
| Sirenia          | 26DN<br>A_new | 32.40 | 30.58 | 35.21 | 4.63  | 26DNA_re<br>calibration | 32.37 | 30.50 | 35.10 | 4.60  | 0.03                           | 0.03                               |
| Pholidota        | 26DN<br>A_new | 27.87 | 17.10 | 39.42 | 22.32 | 26DNA_re<br>calibration | 27.90 | 17.48 | 40.86 | 23.38 | -0.03                          | -1.06                              |
| Dasyromorphia    | 26DN<br>A_new | 27.01 | 18.61 | 34.18 | 15.57 | 26DNA_re<br>calibration | 26.63 | 18.92 | 34.22 | 15.30 | 0.38                           | 0.27                               |
| Peramelomorpha   | 26DN<br>A_new | 26.47 | 19.18 | 34.06 | 14.88 | 26DNA_re<br>calibration | 26.18 | 19.02 | 33.04 | 14.02 | 0.29                           | 0.86                               |
| Paucituberculata | 26DN<br>A_new | 11.81 | 7.70  | 16.00 | 8.30  | 26DNA_re<br>calibration | 11.78 | 7.72  | 16.07 | 8.35  | 0.03                           | -0.05                              |
| Dermoptera       | 26DN<br>A_new | 11.10 | 6.08  | 16.08 | 10.00 | 26DNA_re<br>calibration | 10.96 | 6.01  | 15.82 | 9.81  | 0.14                           | 0.19                               |
| Hyracoidae       | 26DN<br>A_new | 7.13  | 5.72  | 9.33  | 3.61  | 26DNA_re<br>calibration | 7.09  | 5.73  | 9.23  | 3.50  | 0.04                           | 0.11                               |
| Proboscidea      | 26DN<br>A_new | 6.04  | 4.04  | 7.73  | 3.69  | 26DNA_re<br>calibration | 5.96  | 4.02  | 7.66  | 3.64  | 0.08                           | 0.05                               |
| Sum              |               |       |       |       |       |                         |       |       |       |       | -9.57<br>(p =<br>8.89e-<br>01) | -<br>14.59<br>(p=2.7<br>4e-<br>01) |

*P* values was calculated by paired Wilcoxon signed rank test.

**Supplementary Table S18. The divergence time difference between all and partial calibrations from protein alignments under the autocorrelated clock.**

| Order             | Class     | M<br>ean | Lo<br>wer | Up<br>per | Wi<br>dth | Class                  | M<br>ean | Lo<br>wer | Up<br>per | Wi<br>dth | $\Delta$ mean | $\Delta$ width |
|-------------------|-----------|----------|-----------|-----------|-----------|------------------------|----------|-----------|-----------|-----------|---------------|----------------|
| Agreodontia       | 21A       | 59       |           |           |           | 21AA_<br>recalibration | 60       |           |           |           | -0.27         | -0.36          |
|                   | A_ne<br>w | .8<br>4  | 54.<br>70 | 65.<br>11 | 10.<br>41 |                        | .1<br>1  | 54.<br>74 | 65.<br>51 | 10.<br>77 |               |                |
| Eomarsupialia     | 21A       | 61       |           |           |           | 21AA_<br>recalibration | 62       |           |           |           | -0.37         | -0.27          |
|                   | A_ne<br>w | .8<br>3  | 56.<br>43 | 66.<br>67 | 10.<br>24 |                        | .2<br>0  | 56.<br>81 | 67.<br>32 | 10.<br>51 |               |                |
| Australidelphia   | 21A       | 64       |           |           |           | 21AA_<br>recalibration | 65       |           |           |           | -0.48         | -0.01          |
|                   | A_ne<br>w | .8<br>9  | 59.<br>83 | 69.<br>83 | 10.<br>00 |                        | .3<br>7  | 60.<br>30 | 70.<br>31 | 10.<br>01 |               |                |
| Xenarthra         | 21A       | 60       |           |           |           | 21AA_<br>recalibration | 62       |           |           |           | -1.16         | 1.49           |
|                   | A_ne<br>w | .8<br>9  | 51.<br>30 | 67.<br>00 | 15.<br>70 |                        | .0<br>5  | 53.<br>09 | 67.<br>30 | 14.<br>21 |               |                |
| Paenungulata      | 21A       | 63       |           |           |           | 21AA_<br>recalibration | 65       |           |           |           | -1.87         | 1.03           |
|                   | A_ne<br>w | .6<br>5  | 56.<br>48 | 70.<br>56 | 14.<br>08 |                        | .5<br>2  | 58.<br>21 | 71.<br>26 | 13.<br>05 |               |                |
| Afroinsectivora   | 21A       | 66       |           |           |           | 21AA_<br>recalibration | 68       |           |           |           | -2.10         | 0.87           |
|                   | A_ne<br>w | .6<br>3  | 59.<br>07 | 74.<br>38 | 15.<br>31 |                        | .7<br>3  | 60.<br>88 | 75.<br>32 | 14.<br>44 |               |                |
| Afroinsectiphilia | 21A       | 69       |           |           |           | 21AA_<br>recalibration | 71       |           |           |           | -2.33         | 0.96           |
|                   | A_ne<br>w | .5<br>8  | 61.<br>76 | 76.<br>97 | 15.<br>21 |                        | .9<br>1  | 64.<br>15 | 78.<br>40 | 14.<br>25 |               |                |
| Ferae             | 21A       | 73       |           |           |           | 21AA_<br>recalibration | 74       |           |           |           | -1.50         | -0.03          |
|                   | A_ne<br>w | .4<br>2  | 70.<br>41 | 76.<br>59 | 6.1<br>8  |                        | .9<br>2  | 71.<br>91 | 78.<br>12 | 6.2<br>1  |               |                |
| Glires            | 21A       | 72       |           |           |           | 21AA_<br>recalibration | 73       |           |           |           | -1.93         | 0.53           |
|                   | A_ne<br>w | .0<br>0  | 69.<br>61 | 75.<br>54 | 5.9<br>3  |                        | .9<br>3  | 71.<br>26 | 76.<br>66 | 5.4<br>0  |               |                |
| Afrotheria        | 21A       | 72       |           |           |           | 21AA_<br>recalibration | 74       |           |           |           | -2.53         | 0.71           |
|                   | A_ne<br>w | .0<br>8  | 64.<br>51 | 79.<br>52 | 15.<br>01 |                        | .6<br>1  | 66.<br>90 | 81.<br>20 | 14.<br>3  |               |                |
| Primate<br>morpha | 21A       | 75       |           |           |           | 21AA_<br>recalibration | 78       |           |           |           | -2.90         | -0.52          |
|                   | A_ne<br>w | .3<br>8  | 72.<br>38 | 78.<br>35 | 5.9<br>7  |                        | .2<br>8  | 75.<br>11 | 81.<br>60 | 6.4<br>9  |               |                |
| Variamina         | 21A       | 76       |           |           |           | 21AA_<br>recalibration | 78       |           |           |           | -1.84         | 0              |
|                   | A_ne<br>w | .7<br>0  | 73.<br>56 | 80.<br>04 | 6.4<br>8  |                        | .5<br>4  | 75.<br>30 | 81.<br>78 | 6.4<br>8  |               |                |

|                    |                  |               |           |           |           |                        |               |           |                |           |       |       |
|--------------------|------------------|---------------|-----------|-----------|-----------|------------------------|---------------|-----------|----------------|-----------|-------|-------|
| Marsupialia        | 21A<br>A_ne<br>w | 80<br>.5<br>8 | 76.<br>48 | 84.<br>38 | 7.9<br>0  | 21AA_rec<br>alibration | 82<br>.0<br>1 | 78.<br>33 | 84.<br>81      | 6.4<br>8  | -1.43 | 1.42  |
| Euarchontoglires   | 21A<br>A_ne<br>w | 77<br>.8<br>8 | 74.<br>72 | 81.<br>08 | 6.3<br>6  | 21AA_rec<br>alibration | 80<br>.5<br>8 | 77.<br>31 | 83.<br>96      | 6.6<br>5  | -2.70 | -0.29 |
| Laurasia<br>theria | 21A<br>A_ne<br>w | 79<br>.1<br>2 | 75.<br>68 | 82.<br>94 | 7.2<br>6  | 21AA_rec<br>alibration | 81<br>.1<br>8 | 77.<br>68 | 84.<br>88      | 7.2<br>0  | -2.06 | 0.06  |
| Boreoeu<br>theria  | 21A<br>A_ne<br>w | 85<br>.8<br>1 | 80.<br>79 | 90.<br>99 | 10.<br>20 | 21AA_rec<br>alibration | 88<br>.6<br>0 | 83.<br>72 | 93.<br>28      | 9.5<br>6  | -2.79 | 0.64  |
| Placenta<br>lia    | 21A<br>A_ne<br>w | 92<br>.2<br>2 | 85.<br>11 | 99.<br>78 | 14.<br>67 | 21AA_rec<br>alibration | 95<br>.5<br>3 | 88.<br>78 | 10<br>2.1<br>6 | 13.<br>38 | -3.31 | 1.29  |
| Eulipoty<br>phla   | 21A<br>A_ne<br>w | 71<br>.8<br>2 | 68.<br>31 | 75.<br>49 | 7.1<br>8  | 21AA_rec<br>alibration | 73<br>.0<br>1 | 69.<br>37 | 76.<br>60      | 7.2<br>3  | -1.19 | -0.05 |
| Rodenti<br>a       | 21A<br>A_ne<br>w | 65<br>.7<br>1 | 64.<br>21 | 66.<br>94 | 2.7<br>3  | 21AA_rec<br>alibration | 66<br>.0<br>9 | 64.<br>90 | 67.<br>30      | 2.4<br>0  | -0.38 | 0.33  |
| Afrosori<br>cida   | 21A<br>A_ne<br>w | 58<br>.2<br>0 | 50.<br>07 | 66.<br>57 | 16.<br>5  | 21AA_rec<br>alibration | 59<br>.8<br>1 | 51.<br>53 | 66.<br>97      | 15.<br>44 | -1.61 | 1.06  |
| Artiodac<br>tyla   | 21A<br>A_ne<br>w | 64<br>.2<br>3 | 62.<br>06 | 66.<br>21 | 4.1<br>5  | 21AA_rec<br>alibration | 64<br>.7<br>5 | 62.<br>75 | 66.<br>47      | 3.7<br>2  | -0.52 | 0.43  |
| Primates           | 21A<br>A_ne<br>w | 66<br>.1<br>9 | 63.<br>89 | 68.<br>59 | 4.7<br>0  | 21AA_rec<br>alibration | 71<br>.2<br>4 | 67.<br>50 | 75.<br>52      | 8.0<br>2  | -5.05 | -3.32 |
| Chiropte<br>ra     | 21A<br>A_ne<br>w | 64<br>.9<br>8 | 62.<br>58 | 67.<br>12 | 4.5<br>4  | 21AA_rec<br>alibration | 65<br>.3<br>4 | 63.<br>05 | 67.<br>38      | 4.3<br>3  | -0.36 | 0.21  |
| Perissod<br>actyla | 21A<br>A_ne<br>w | 58<br>.2<br>8 | 55.<br>58 | 61.<br>14 | 5.5<br>6  | 21AA_rec<br>alibration | 58<br>.2<br>7 | 55.<br>56 | 61.<br>13      | 5.5<br>7  | 0.01  | -0.01 |
| Carnivor<br>a      | 21A<br>A_ne<br>w | 58<br>.9<br>1 | 54.<br>41 | 63.<br>43 | 9.0<br>2  | 21AA_rec<br>alibration | 59<br>.4<br>2 | 55.<br>55 | 63.<br>59      | 8.0<br>4  | -0.51 | 0.98  |
| Lagomo<br>rpha     | 21A<br>A_ne<br>w | 54<br>.6<br>6 | 53.<br>08 | 56.<br>95 | 3.8<br>7  | 21AA_rec<br>alibration | 54<br>.6<br>8 | 53.<br>13 | 57.<br>05      | 3.9<br>2  | -0.02 | -0.05 |

|                  |                  |               |           |           |           |                        |               |           |           |           |                                |                               |
|------------------|------------------|---------------|-----------|-----------|-----------|------------------------|---------------|-----------|-----------|-----------|--------------------------------|-------------------------------|
| Pilosa           | 21A<br>A_ne<br>w | 50<br>.8<br>1 | 40.<br>78 | 58.<br>84 | 18.<br>06 | 21AA_rec<br>alibration | 51<br>.4<br>5 | 42.<br>07 | 58.<br>62 | 16.<br>55 | -0.64                          | 1.51                          |
| Scandentia       | 21A<br>A_ne<br>w | 49<br>.9<br>1 | 36.<br>87 | 60.<br>58 | 23.<br>71 | 21AA_rec<br>alibration | 52<br>.9<br>9 | 40.<br>53 | 63.<br>88 | 23.<br>35 | -3.08                          | 0.36                          |
| Macroscelidea    | 21A<br>A_ne<br>w | 42<br>.3<br>7 | 31.<br>84 | 54.<br>39 | 22.<br>55 | 21AA_rec<br>alibration | 48<br>.4<br>3 | 39.<br>38 | 56.<br>76 | 17.<br>38 | -6.06                          | 5.17                          |
| Diprotodontia    | 21A<br>A_ne<br>w | 54<br>.5<br>1 | 49.<br>24 | 59.<br>92 | 10.<br>68 | 21AA_rec<br>alibration | 47<br>.8<br>5 | 43.<br>19 | 52.<br>95 | 9.7<br>6  | 6.66                           | 0.92                          |
| Didelphimorphia  | 21A<br>A_ne<br>w | 37<br>.8<br>4 | 25.<br>75 | 49.<br>13 | 23.<br>38 | 21AA_rec<br>alibration | 37<br>.4<br>8 | 29.<br>11 | 47.<br>74 | 18.<br>63 | 0.36                           | 4.75                          |
| Sirenia          | 21A<br>A_ne<br>w | 33<br>.8<br>2 | 30.<br>77 | 38.<br>26 | 7.4<br>9  | 21AA_rec<br>alibration | 32<br>.3<br>7 | 30.<br>50 | 35.<br>10 | 4.6<br>0  | 1.45                           | 2.89                          |
| Pholidota        | 21A<br>A_ne<br>w | 29<br>.9<br>1 | 15.<br>67 | 42.<br>99 | 27.<br>32 | 21AA_rec<br>alibration | 27<br>.9<br>0 | 17.<br>48 | 40.<br>86 | 23.<br>38 | 2.01                           | 3.94                          |
| Dasyuromorphia   | 21A<br>A_ne<br>w | 29<br>.5<br>2 | 18.<br>88 | 39.<br>35 | 20.<br>47 | 21AA_rec<br>alibration | 26<br>.6<br>3 | 18.<br>92 | 34.<br>22 | 15.<br>30 | 2.89                           | 5.17                          |
| Peramelomorpha   | 21A<br>A_ne<br>w | 26<br>.6<br>2 | 16.<br>18 | 37.<br>76 | 21.<br>58 | 21AA_rec<br>alibration | 26<br>.1<br>8 | 19.<br>02 | 33.<br>04 | 14.<br>02 | 0.44                           | 7.56                          |
| Paucituberculata | 21A<br>A_ne<br>w | 13<br>.0<br>2 | 7.3<br>0  | 16.<br>84 | 9.5<br>4  | 21AA_rec<br>alibration | 11<br>.7<br>8 | 7.7<br>2  | 16.<br>07 | 8.3<br>5  | 1.24                           | 1.19                          |
| Dermoptera       | 21A<br>A_ne<br>w | 17<br>.1<br>4 | 6.5<br>0  | 26.<br>61 | 20.<br>11 | 21AA_rec<br>alibration | 10<br>.9<br>6 | 6.0<br>1  | 15.<br>82 | 9.8<br>1  | 6.18                           | 10.3                          |
| Hyracoidae       | 21A<br>A_ne<br>w | 7.<br>98      | 5.8<br>1  | 11.<br>08 | 5.2<br>7  | 21AA_rec<br>alibration | 7.<br>09      | 5.7<br>3  | 9.2<br>3  | 3.5<br>0  | 0.89                           | 1.77                          |
| Proboscidea      | 21A<br>A_ne<br>w | 9.<br>60      | 5.7<br>1  | 15.<br>81 | 10.<br>10 | 21AA_rec<br>alibration | 5.<br>96      | 4.0<br>2  | 7.6<br>6  | 3.6<br>4  | 3.64                           | 6.46                          |
| Sum              |                  |               |           |           |           |                        |               |           |           |           | -25.22<br>(p=2.3<br>0e-<br>02) | 59.09<br>(p=4.4<br>6e-<br>05) |

*P*-values was calculated by paired Wilcoxon signed rank test.



## Reference

Meredith RW, Janečka JE, Gatesy J, et al. 2011. Impacts of the Cretaceous Terrestrial Revolution and KPg extinction on mammal diversification. *Science*, **334**(6055): 521-524.

Springer MS, Emerling CA, Meredith RW, et al. 2017. Waking the undead: Implications of a soft explosive model for the timing of placental mammal diversification. *Molecular Phylogenetics and Evolution*, **106**: 86-102.

Zhou X, Xu S, Zhang P, et al. 2011. Developing a series of conservative anchor markers and their application to phylogenomics of Laurasiatherian mammals. *Molecular Ecology Resources*, **11**(1): 134-140.
